# Supplementary material
Source: PubMed Central journal article supplement (PMC6551522)

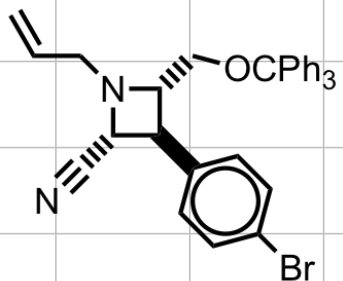

**64** (source A, CDCl<sub>3</sub>, 600 MHz)

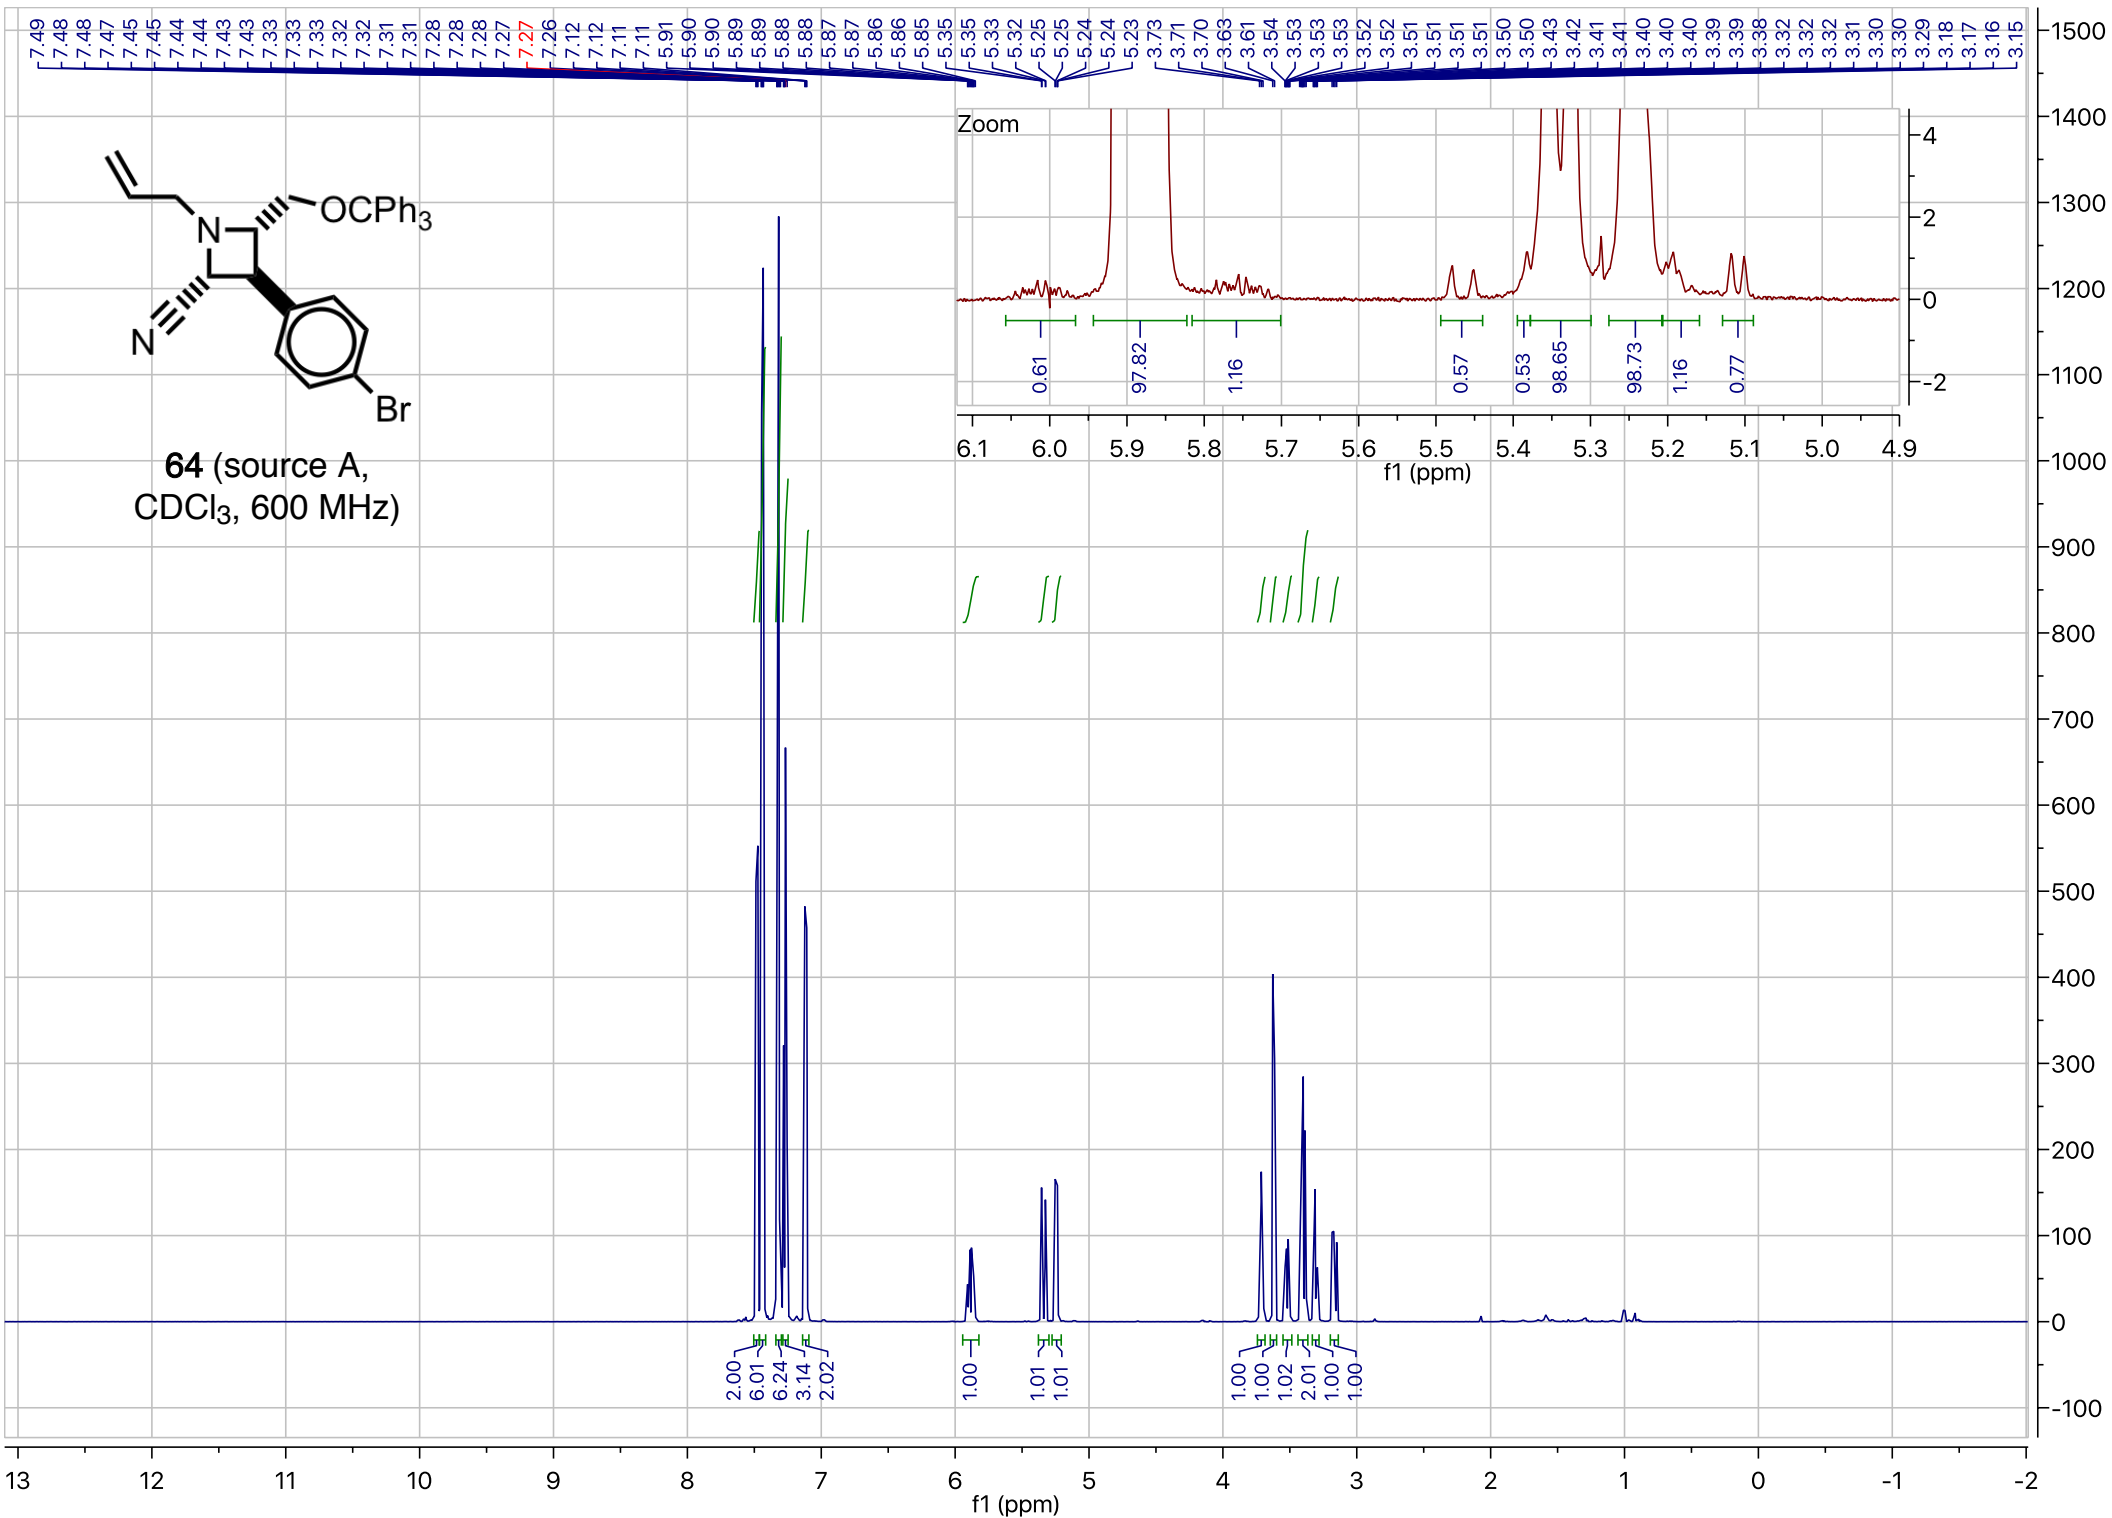

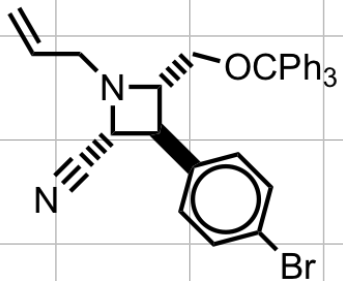

**64** (source B,  
CDCl<sub>3</sub>, 600 MHz)

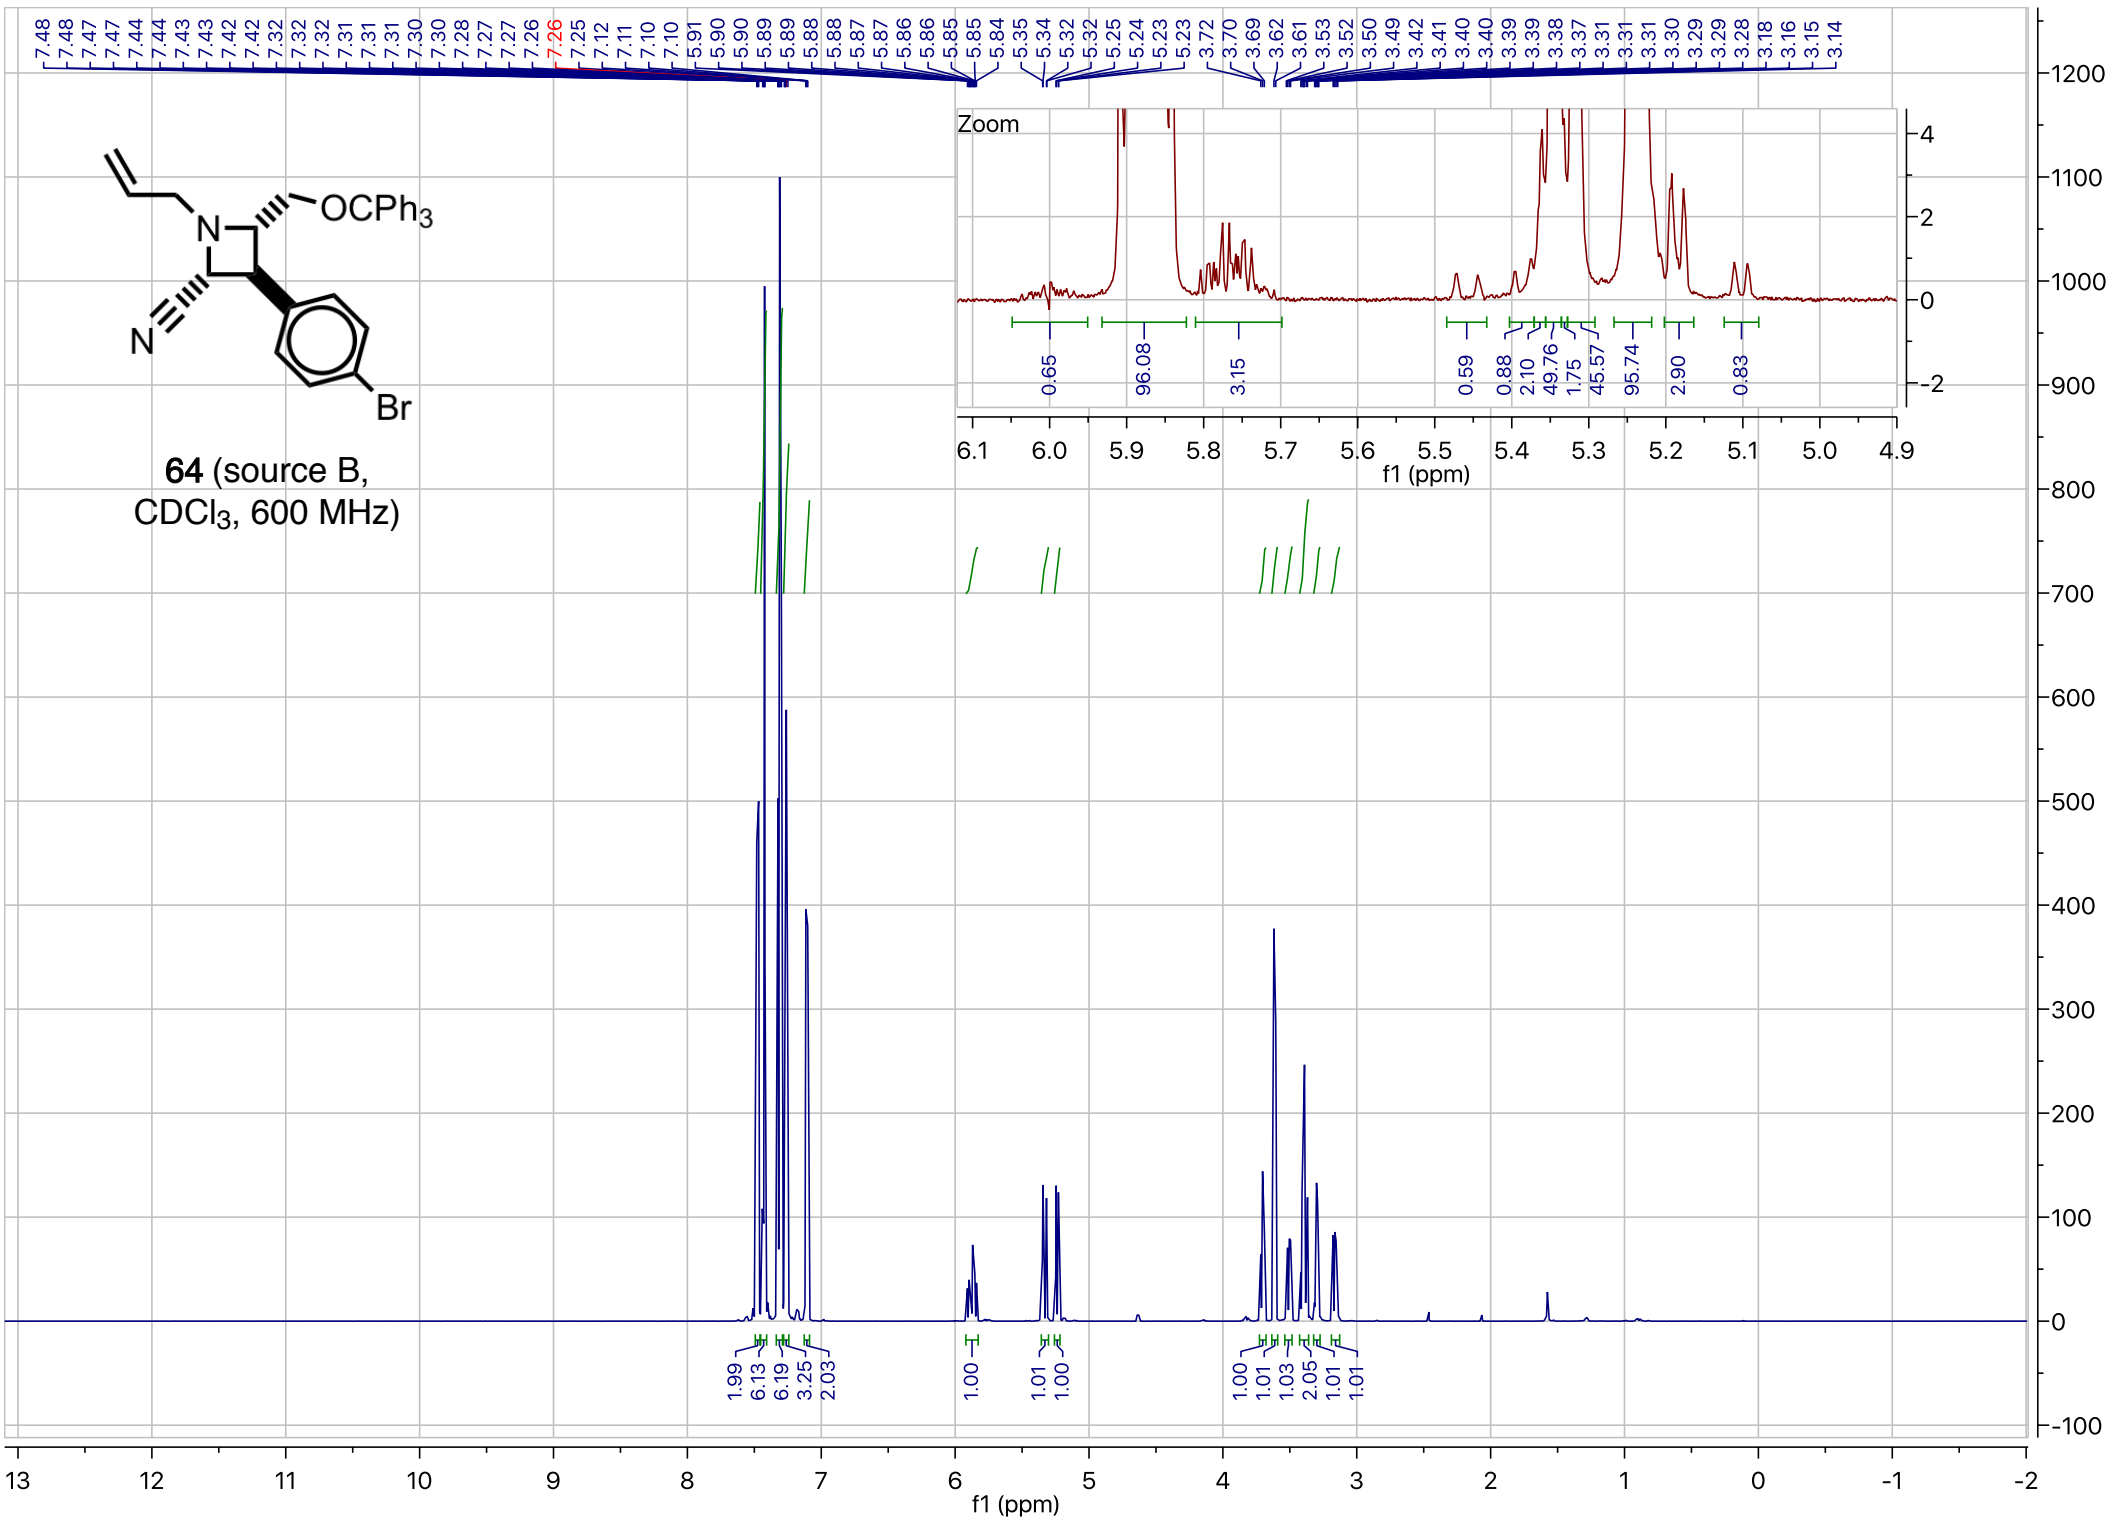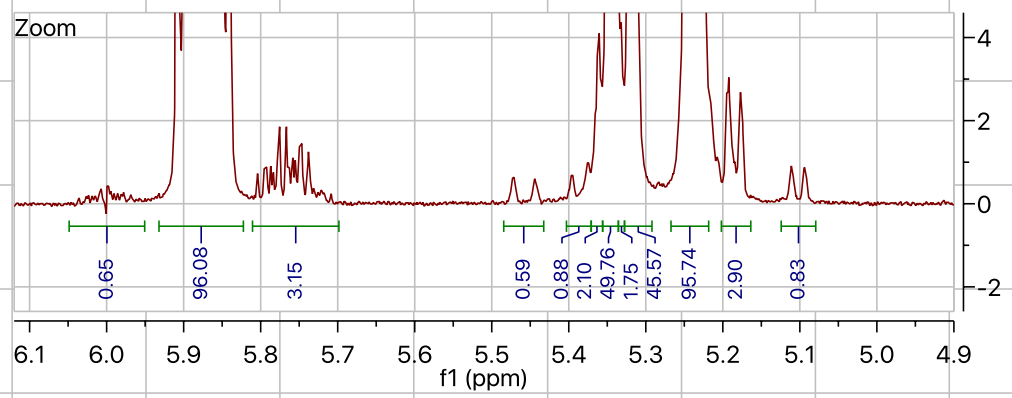

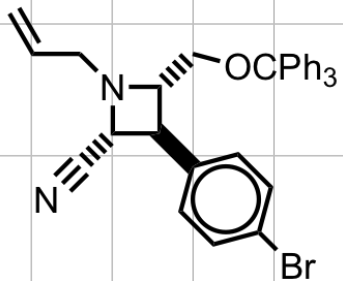

64 (source B,  
CDCl<sub>3</sub>, 600 MHz)

206.35

143.81  
136.75  
132.77  
131.98  
128.87  
128.73  
128.00  
127.26  
121.72  
119.89  
119.23

87.08

77.48

77.16

76.84

69.23

66.37

60.55

55.31

44.69

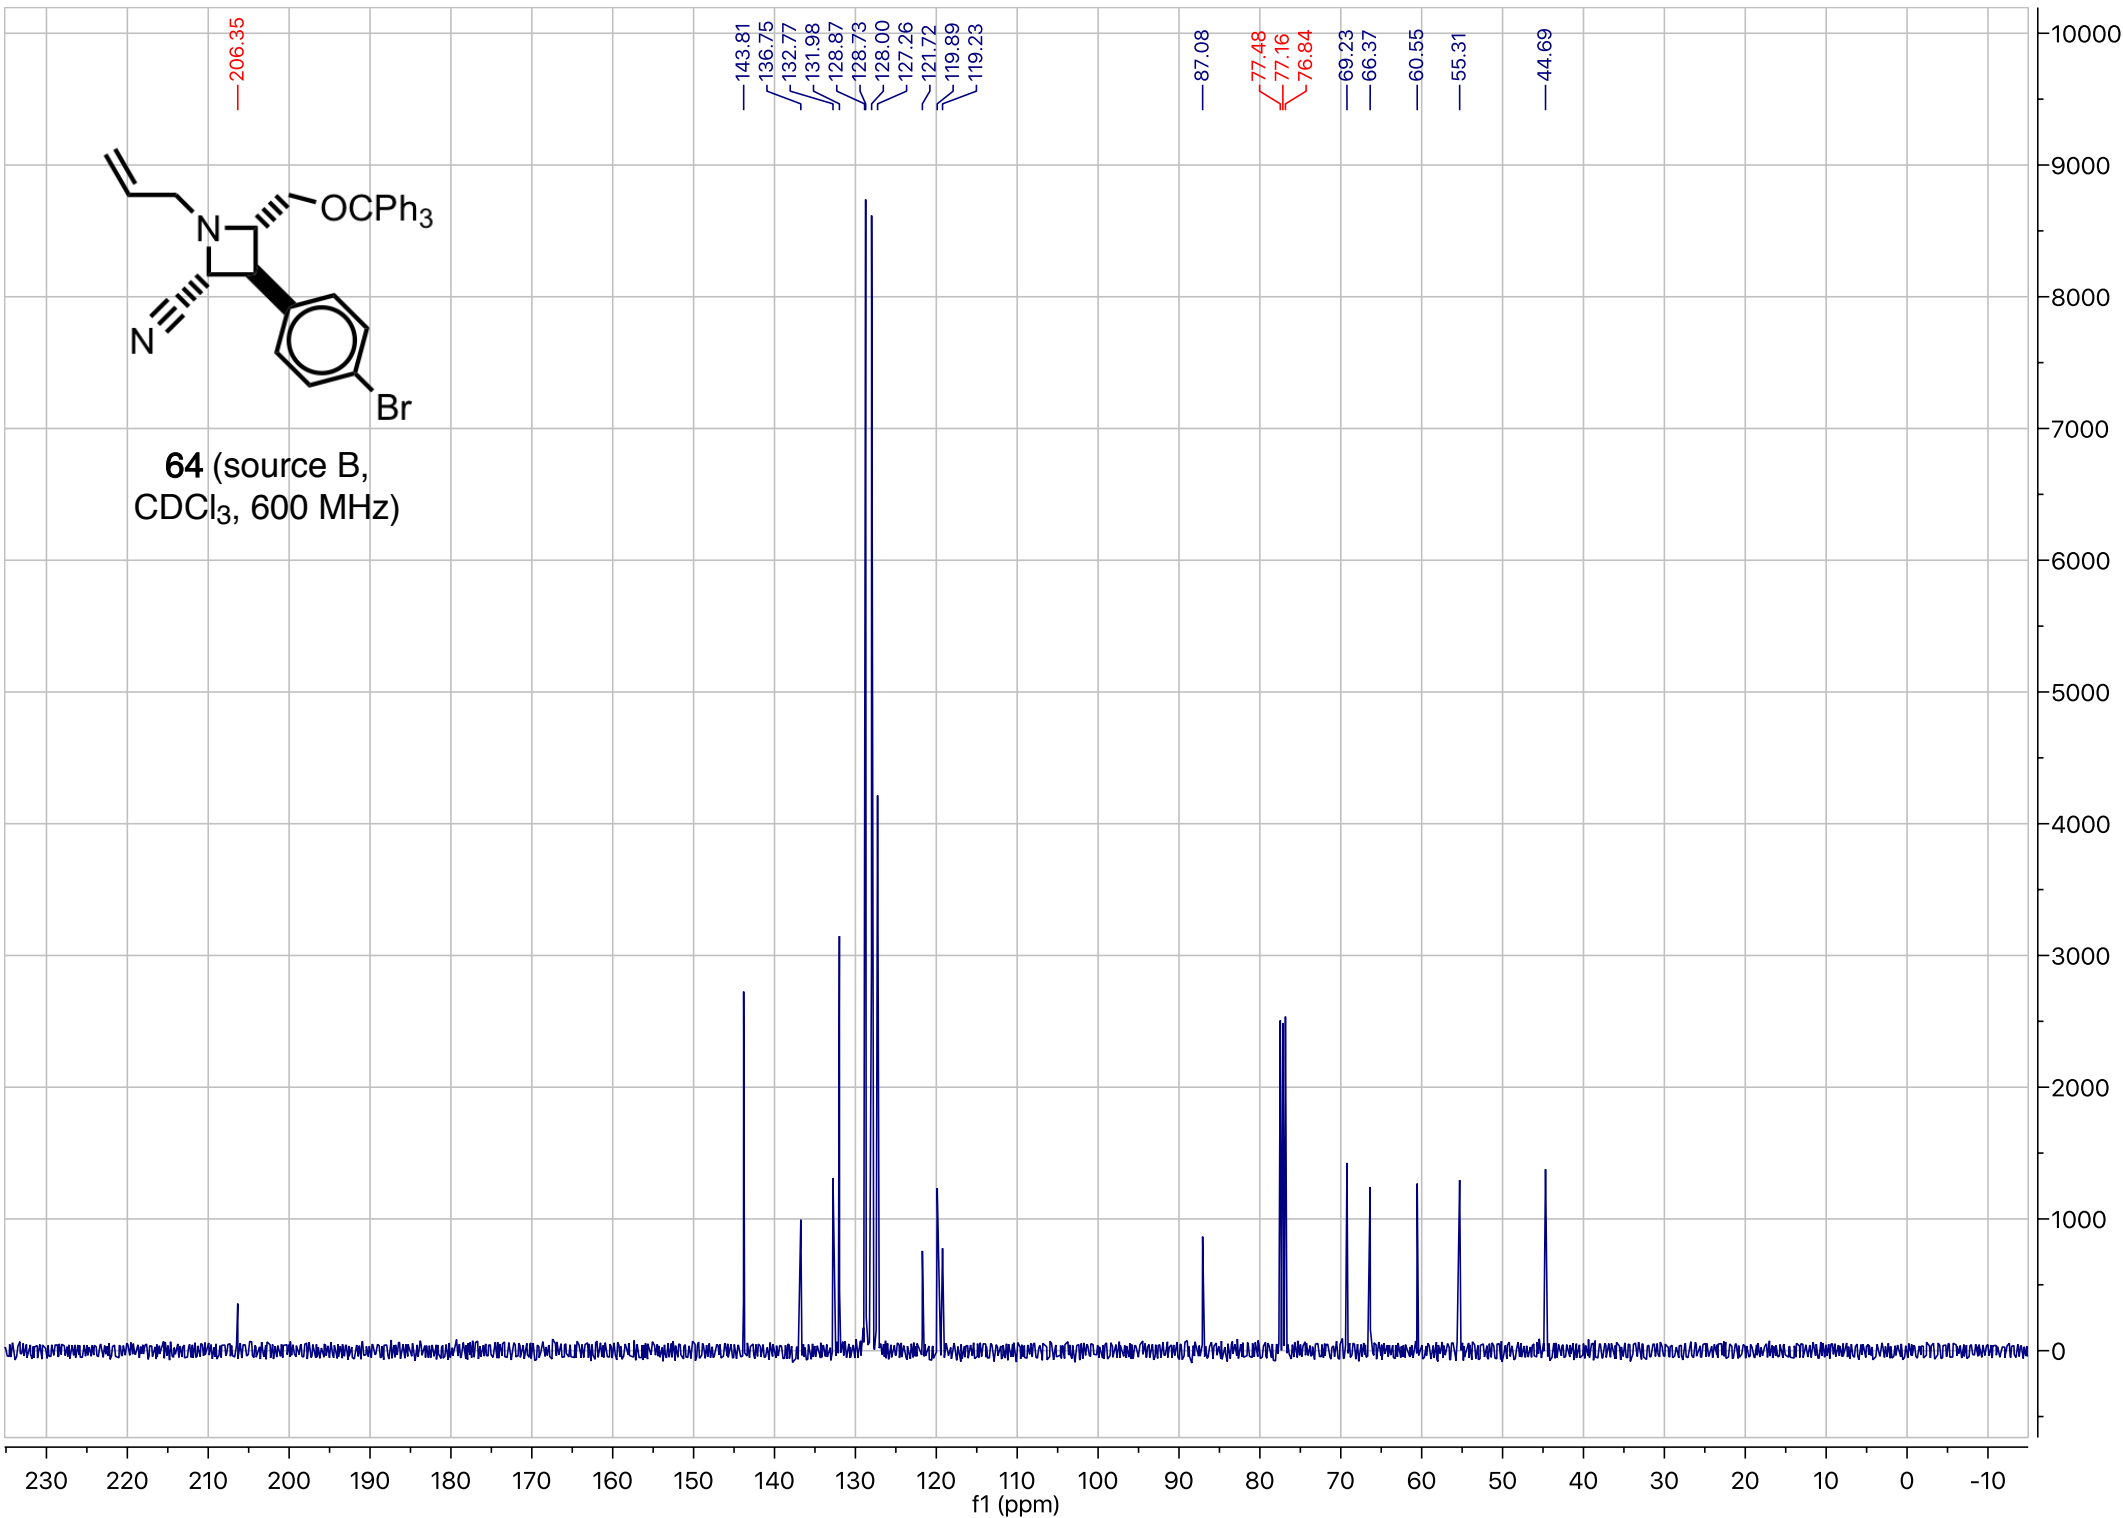

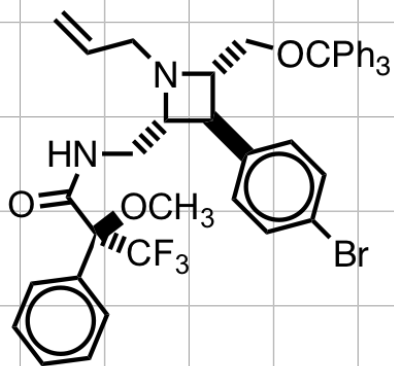

**65** (source A,  
CDCl<sub>3</sub>, 400 MHz)

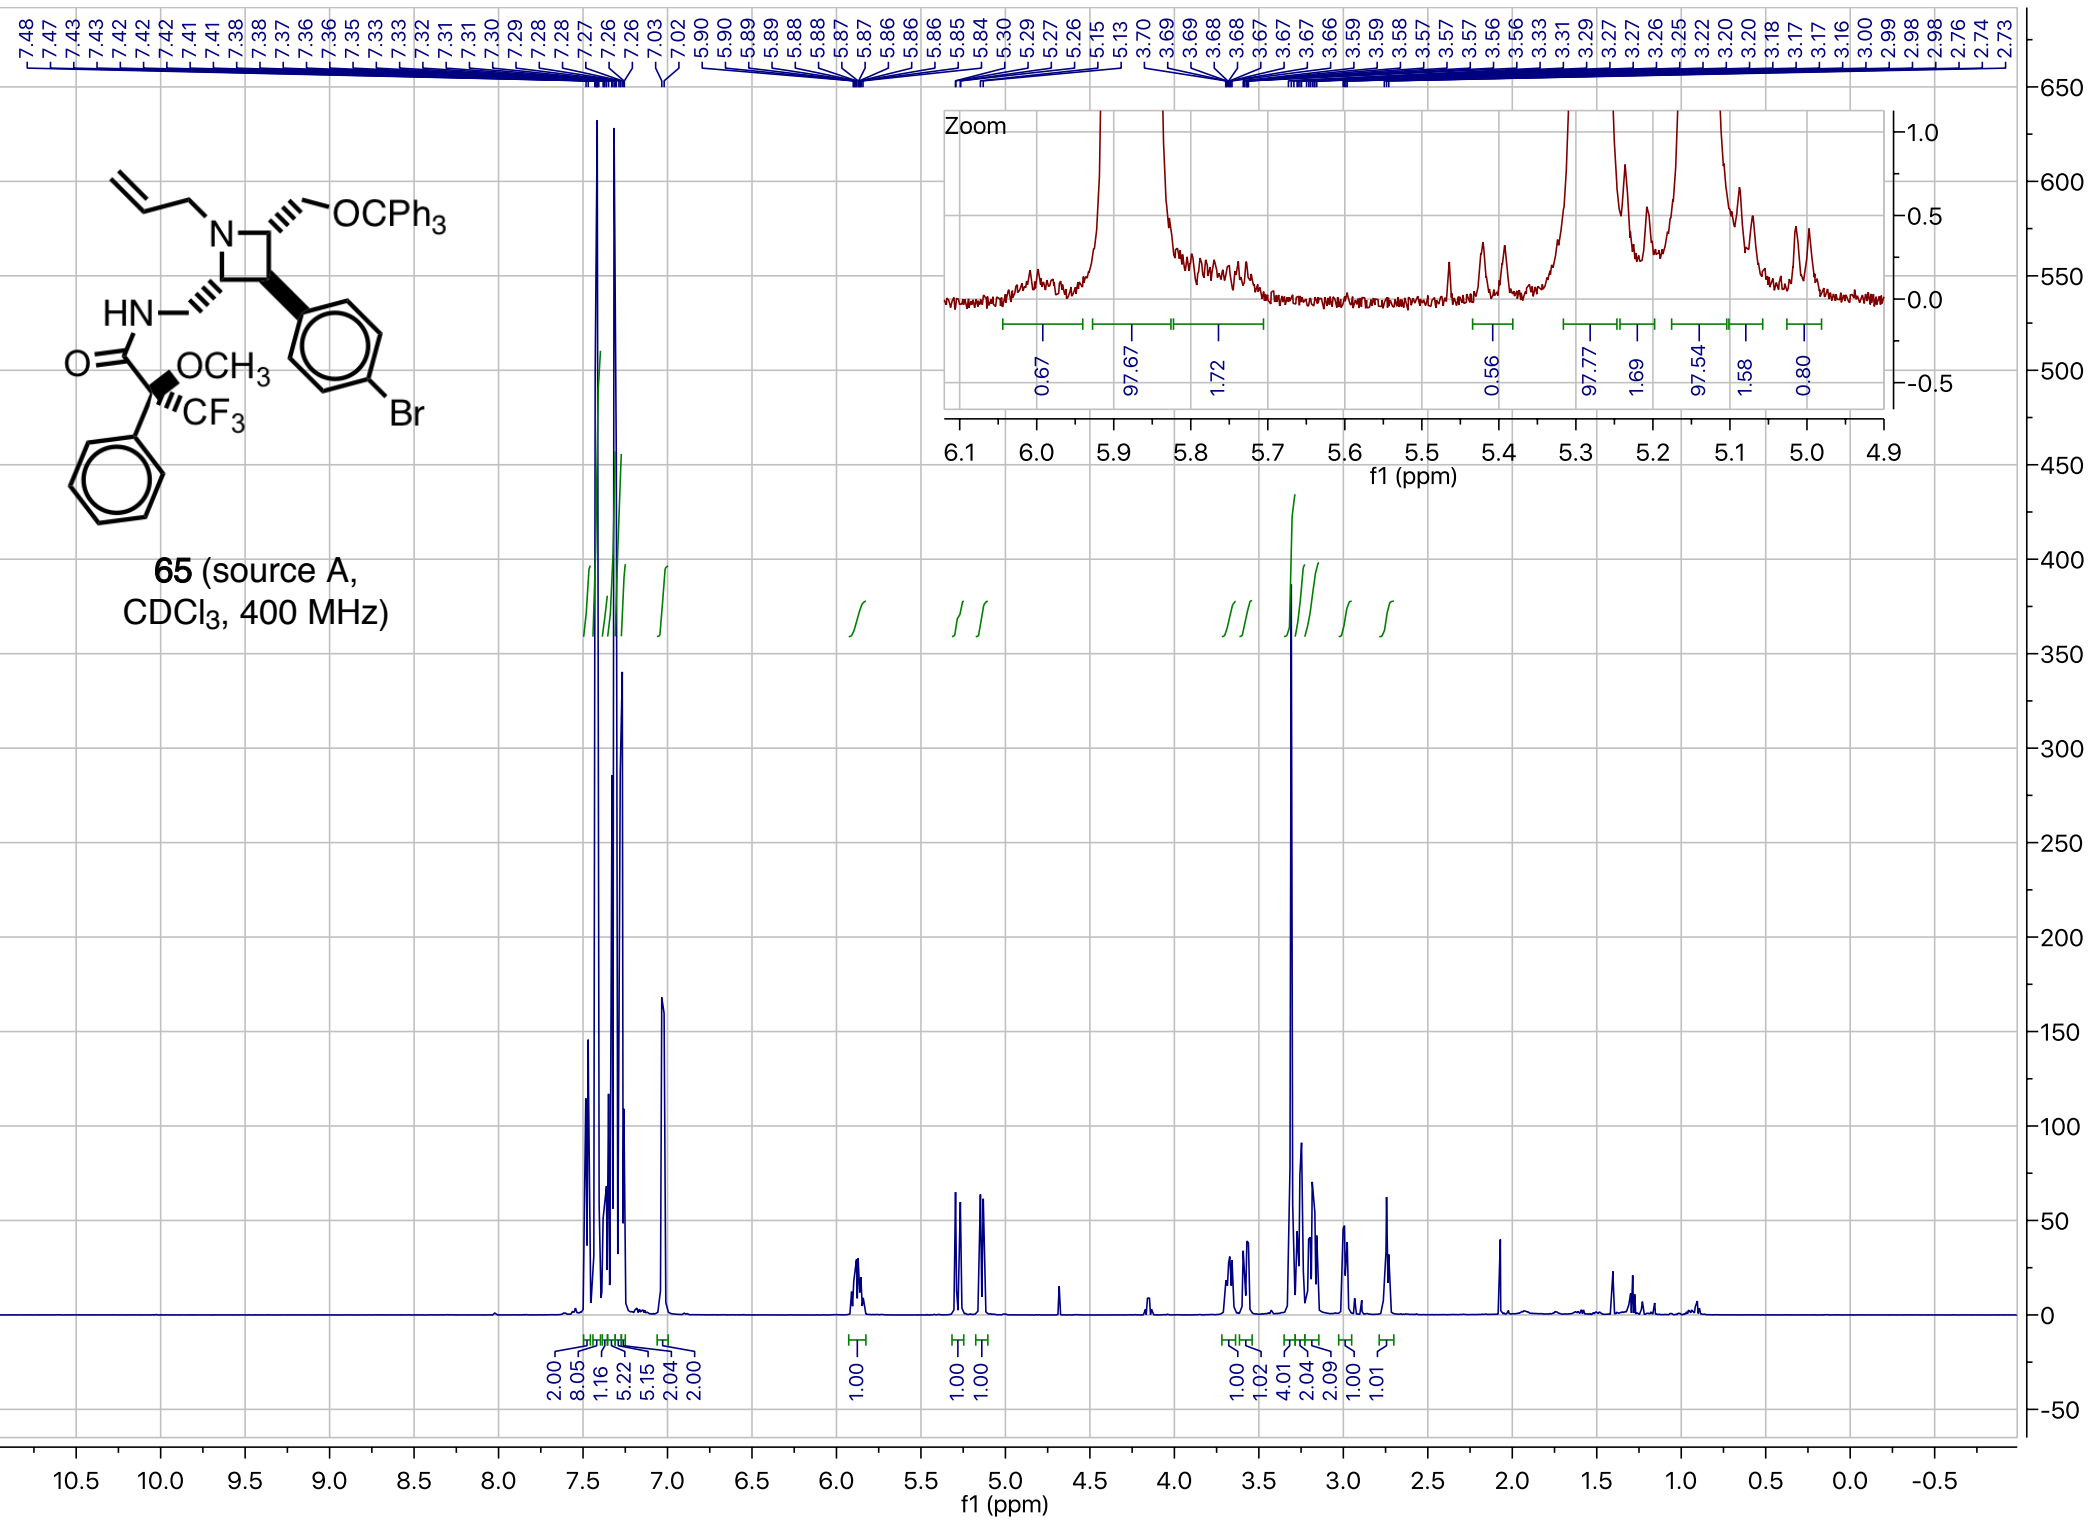

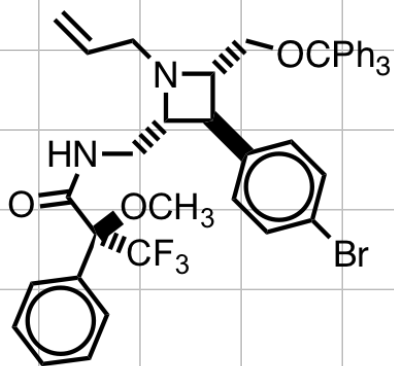

65 (source A, CDCl<sub>3</sub>, 400 MHz)

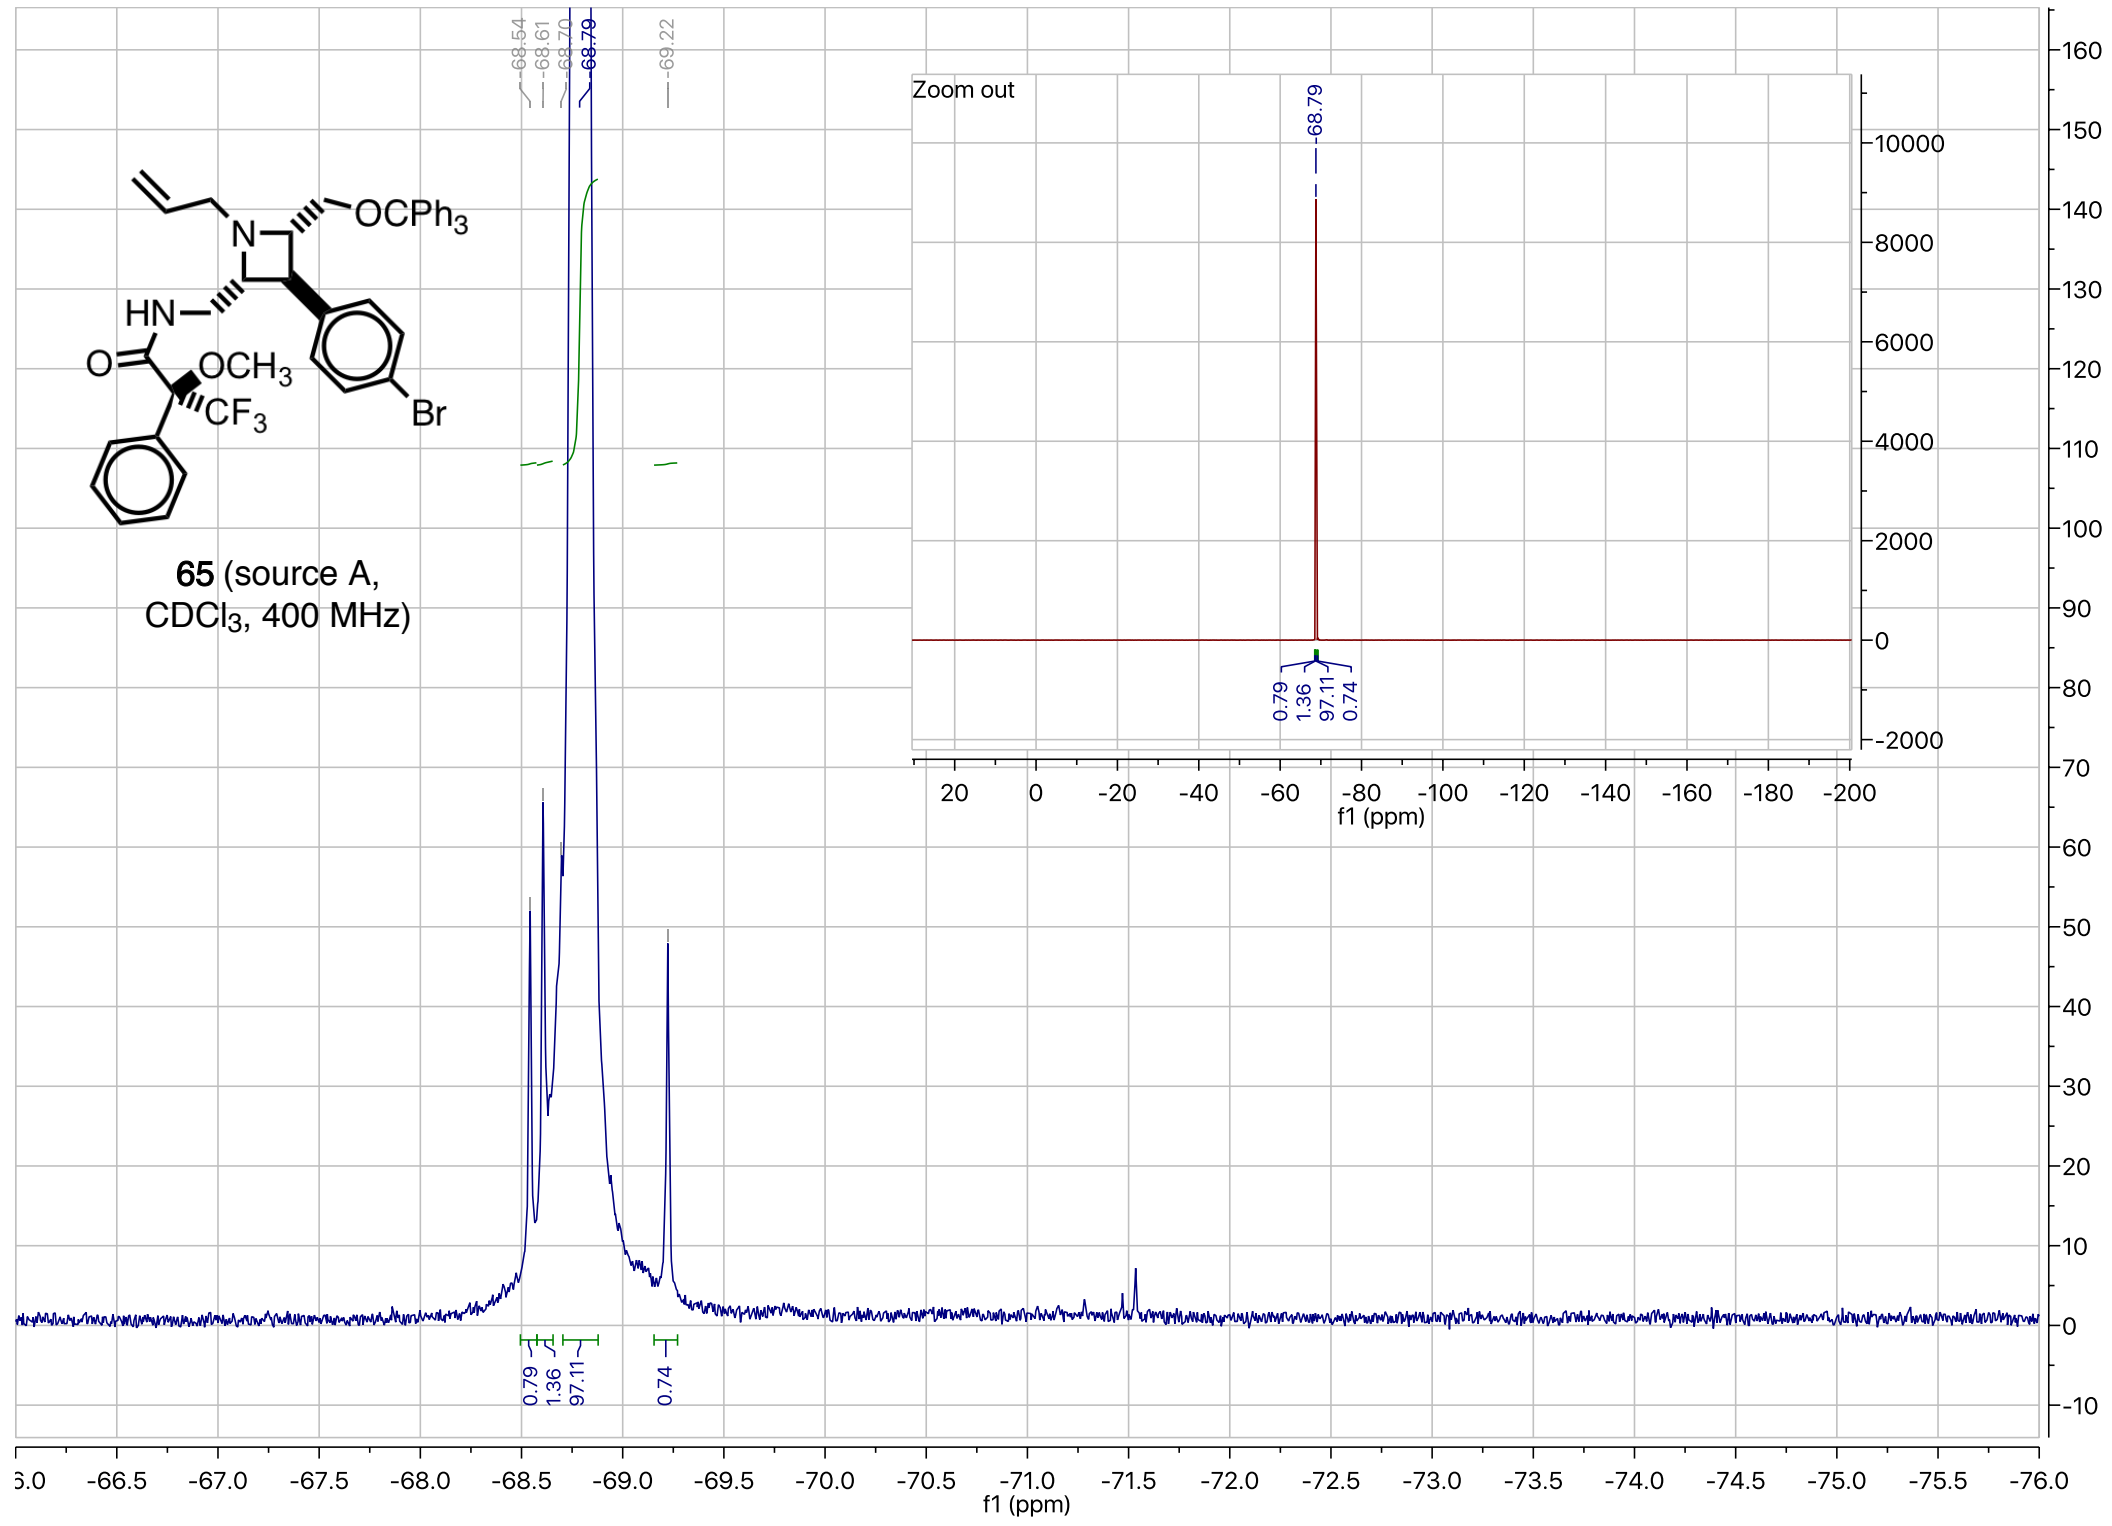



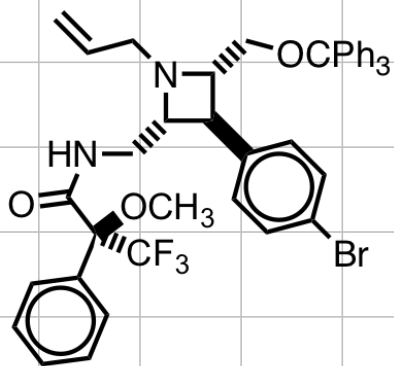

65 (source B, CDCl<sub>3</sub>, 400 MHz)

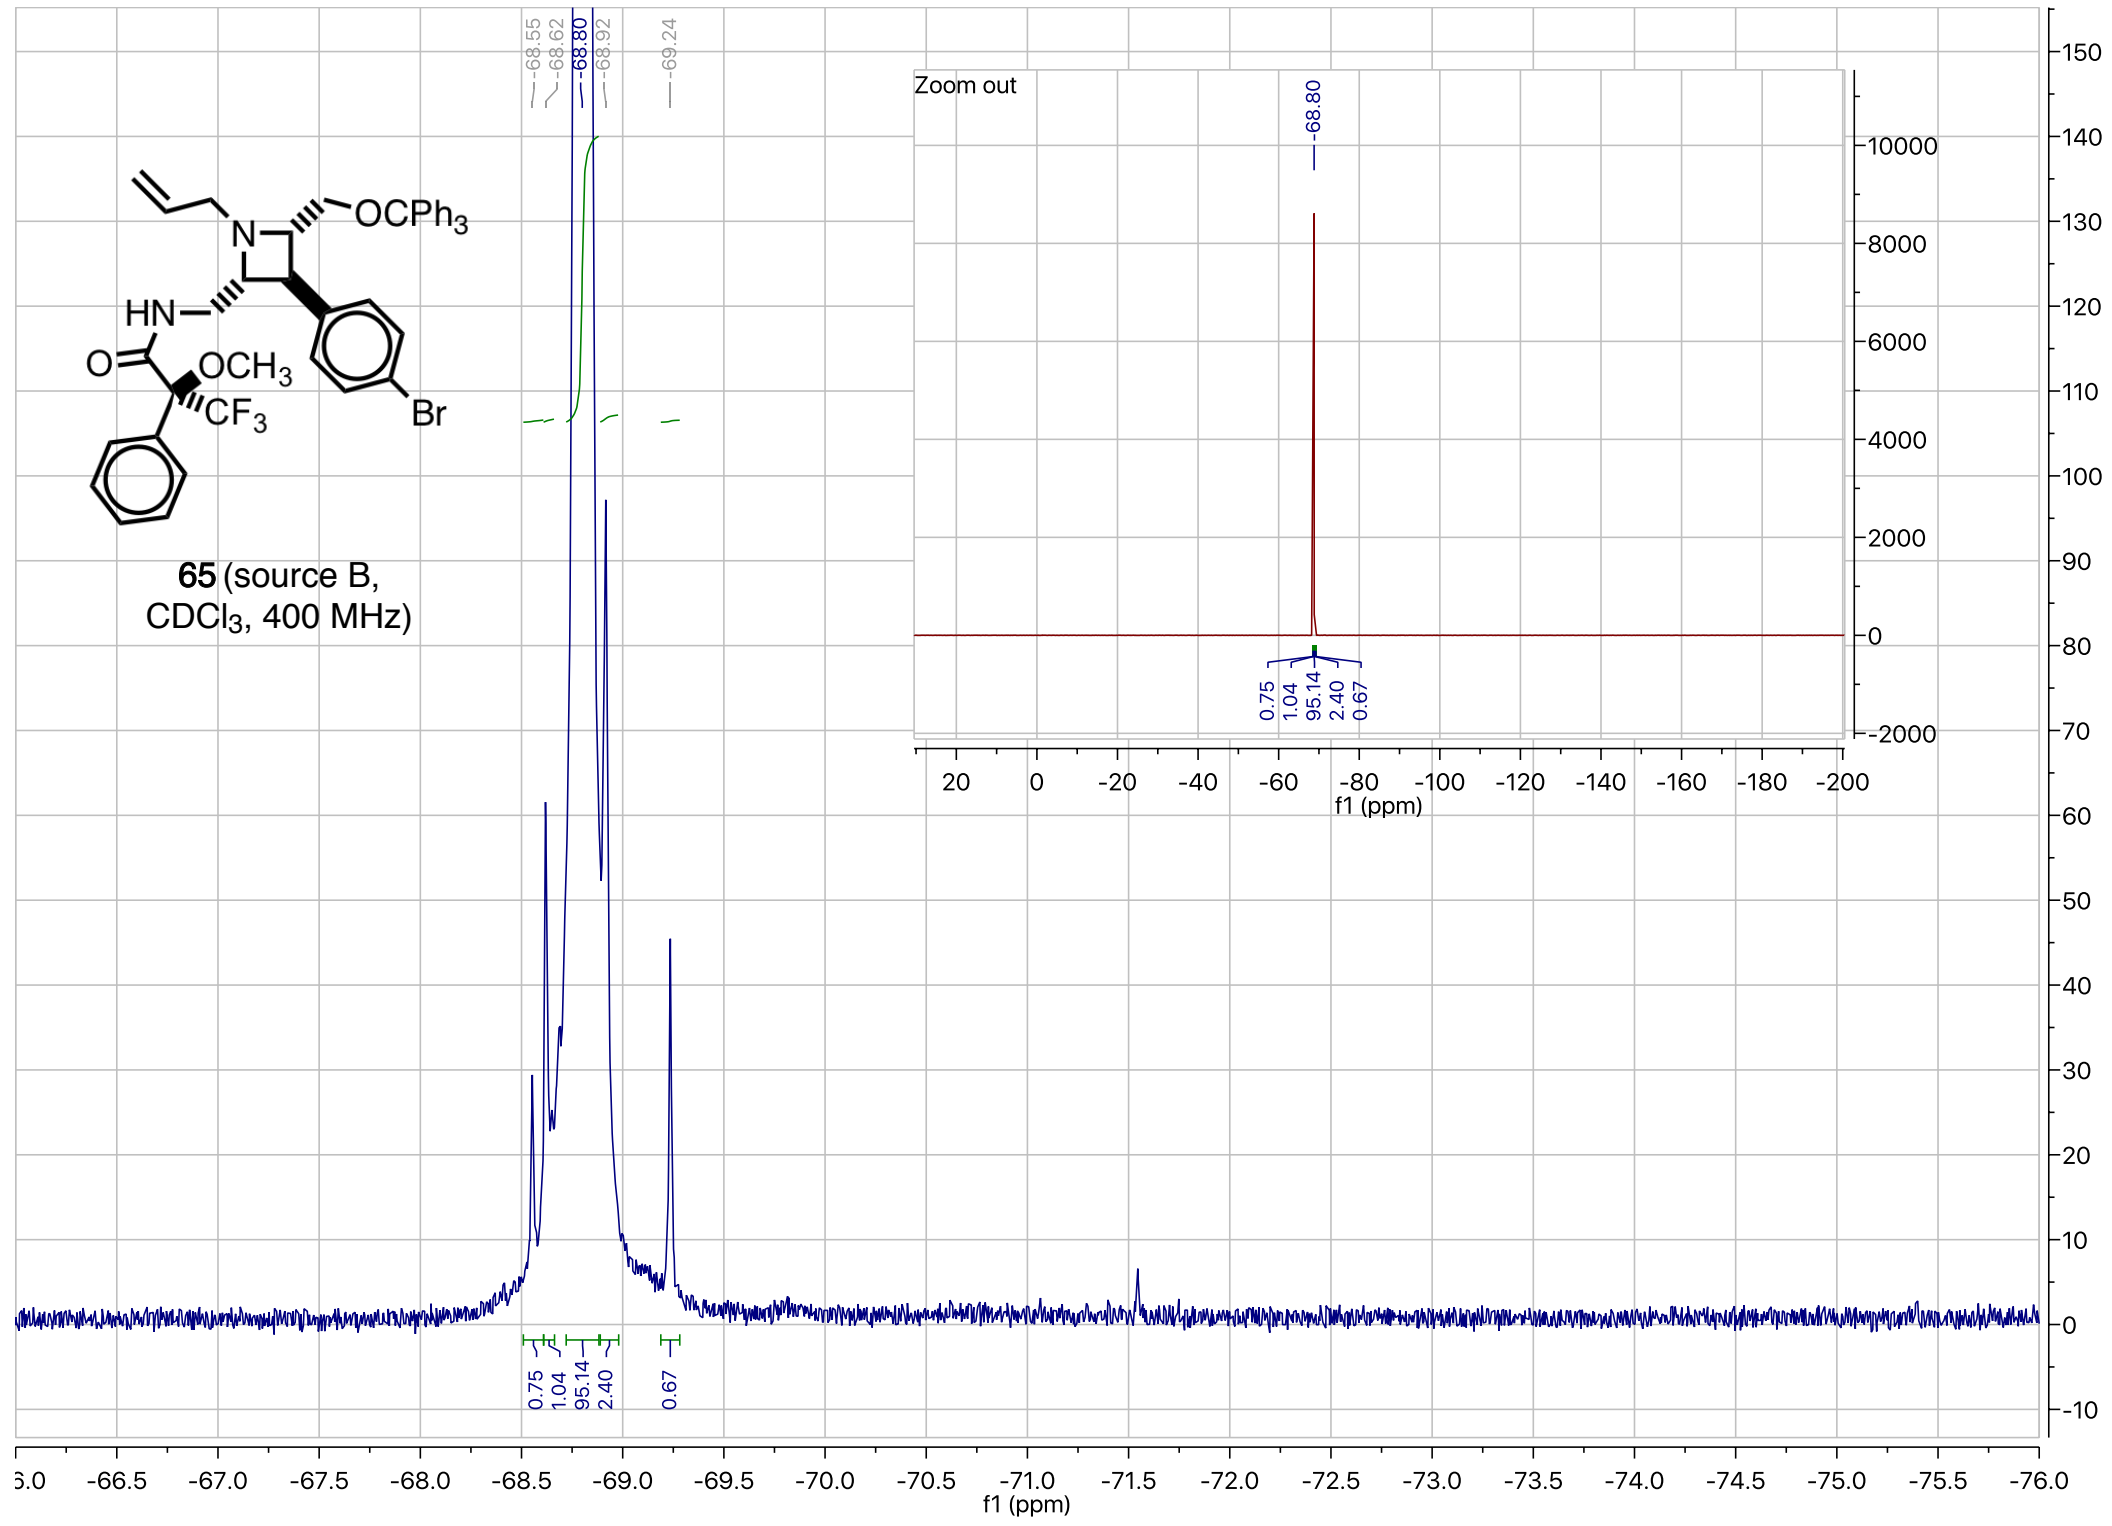

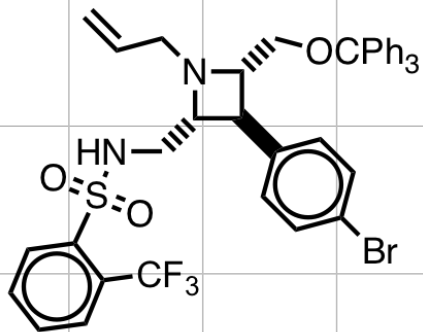

66 (CDCl<sub>3</sub>, 400 MHz)

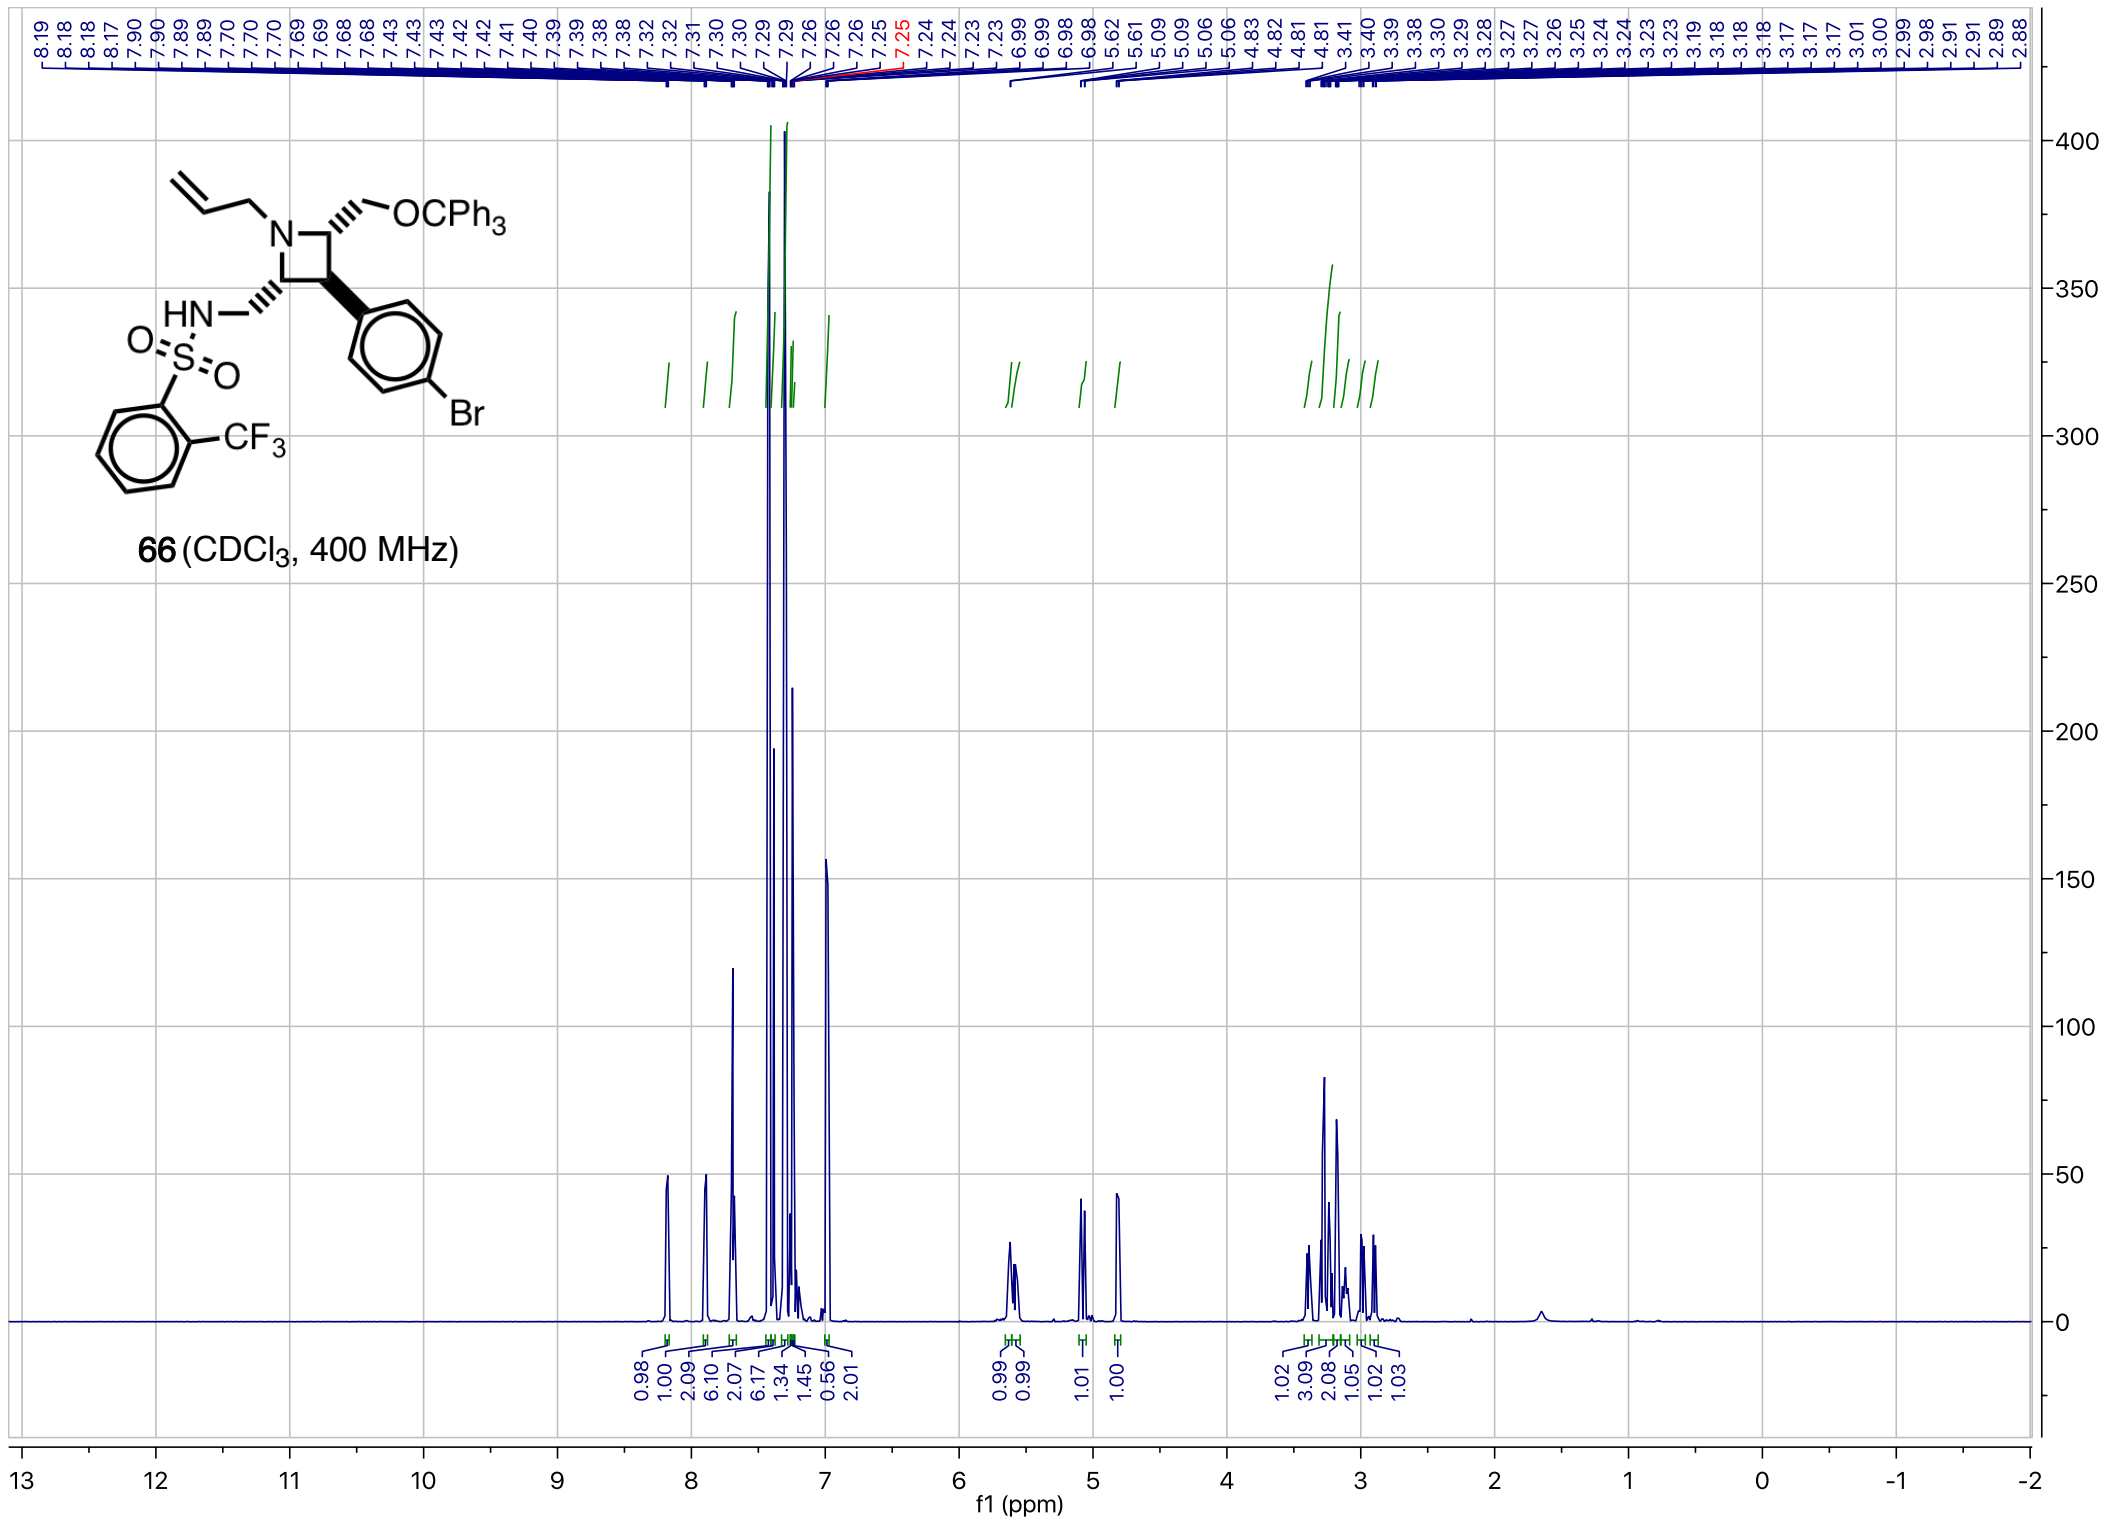



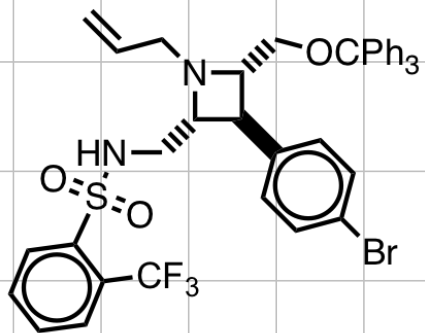

66 (CDCl<sub>3</sub>, 400 MHz)

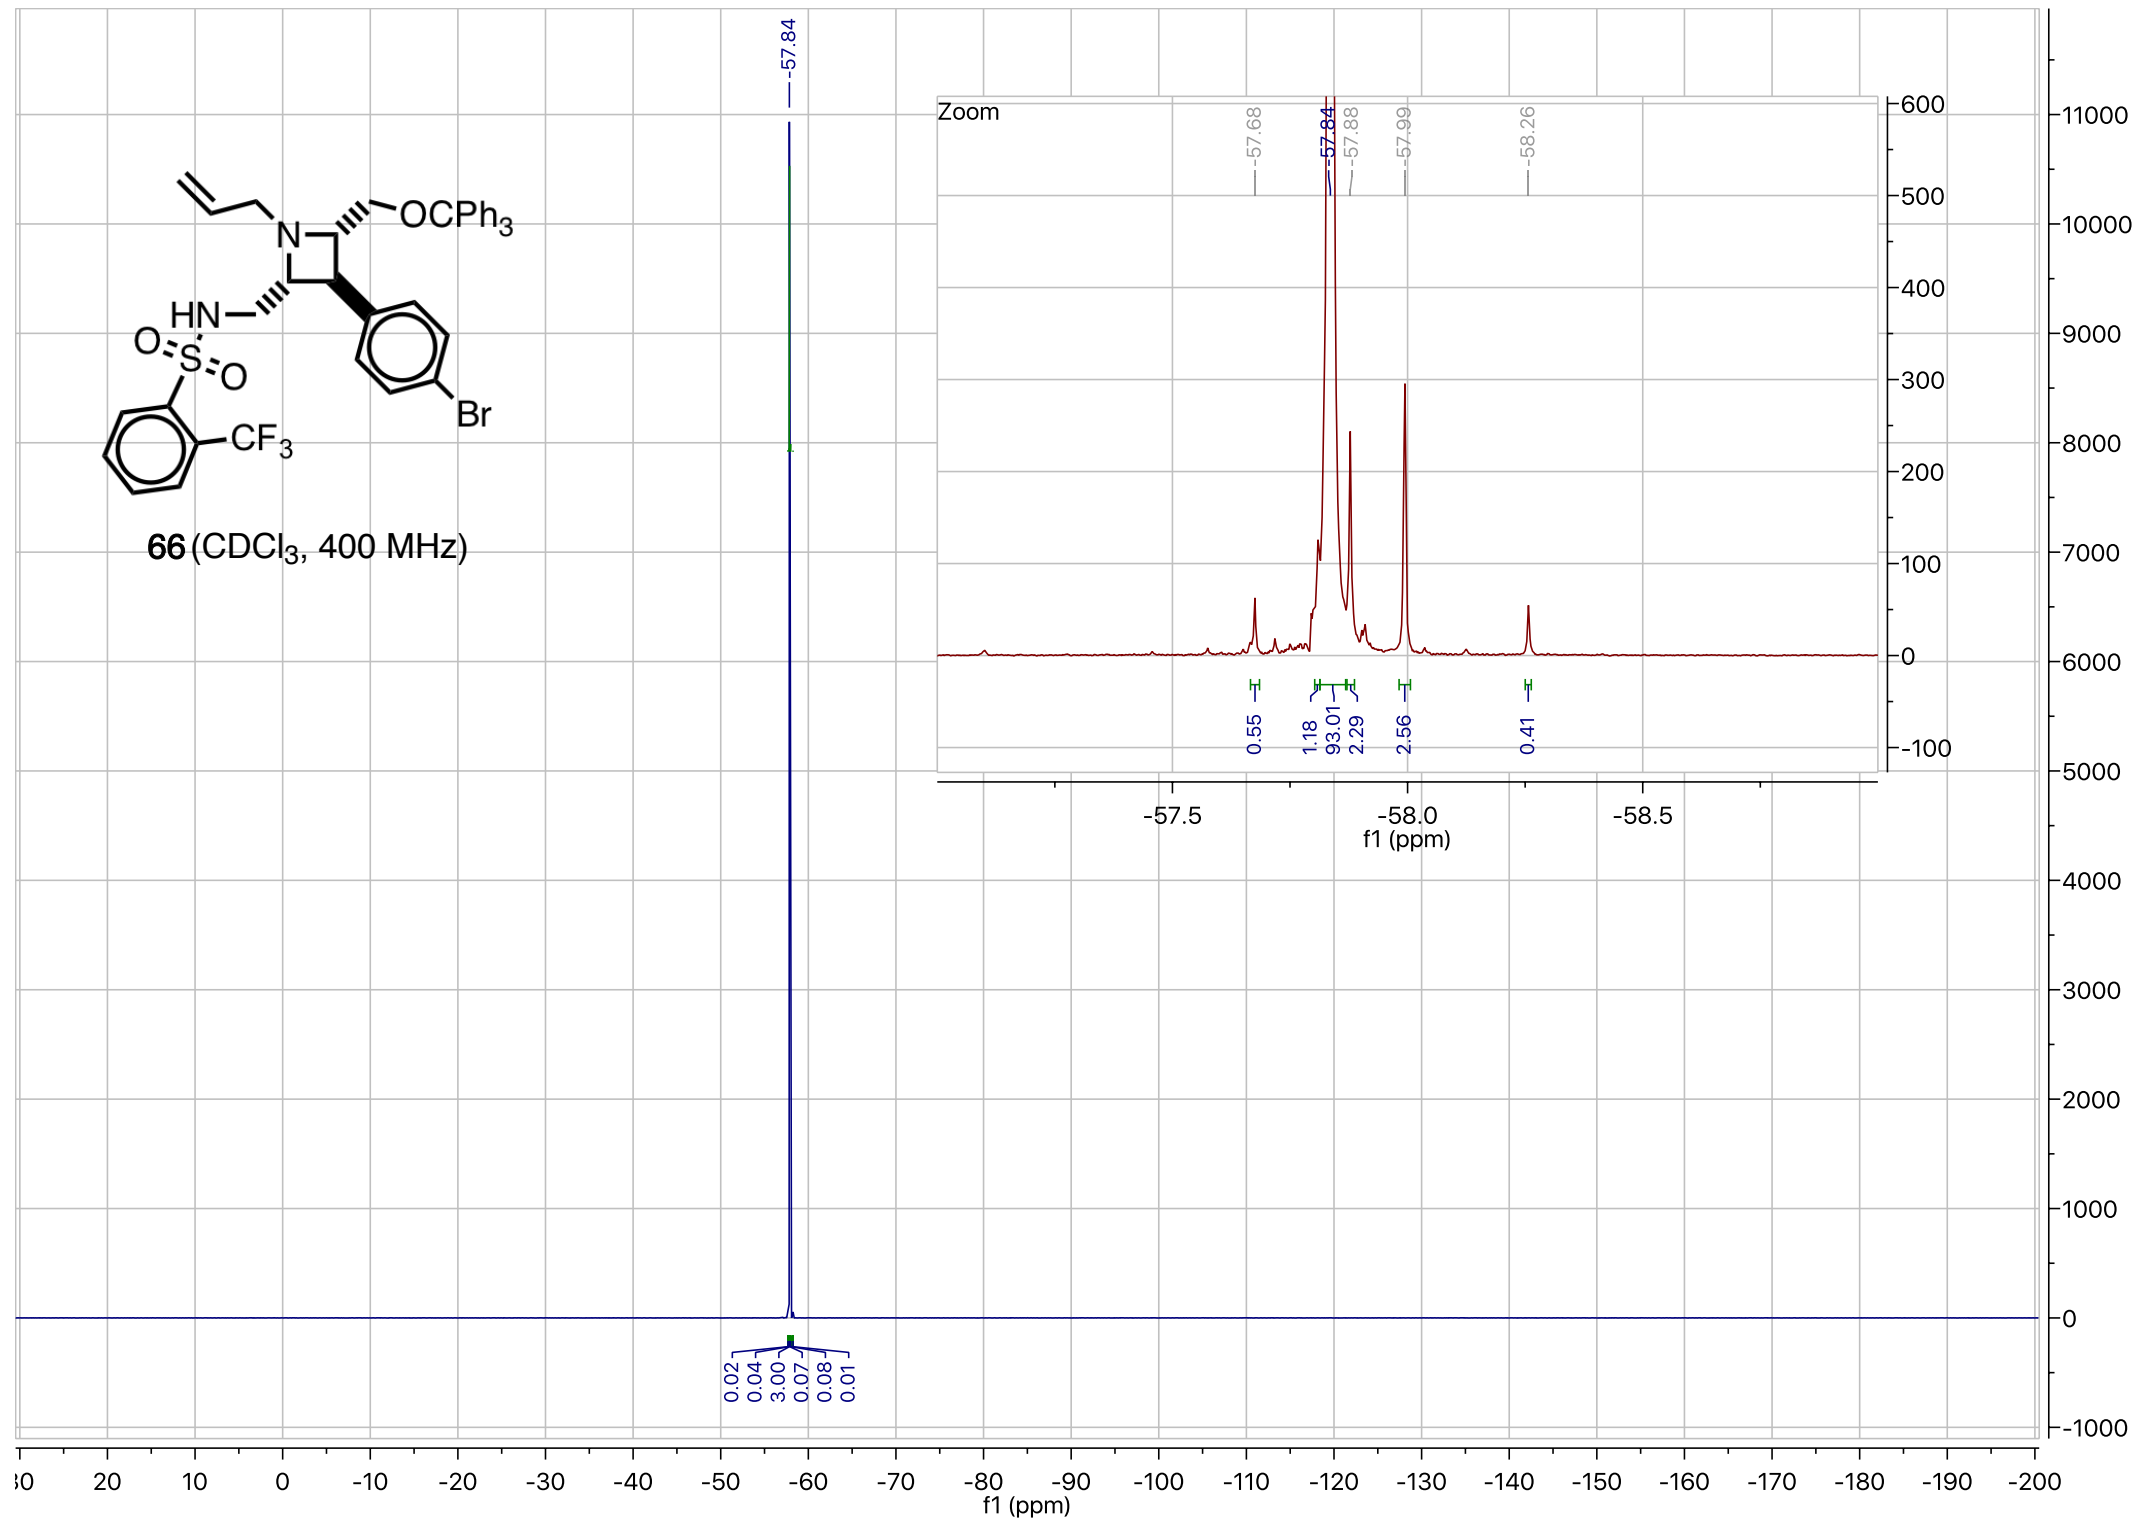

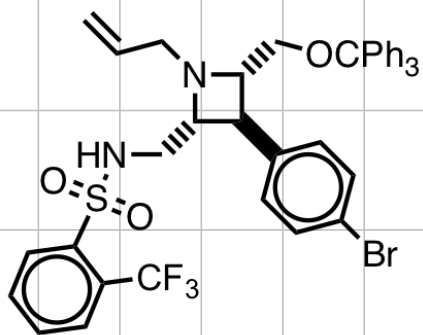

66 (CDCl<sub>3</sub>, 400 MHz)

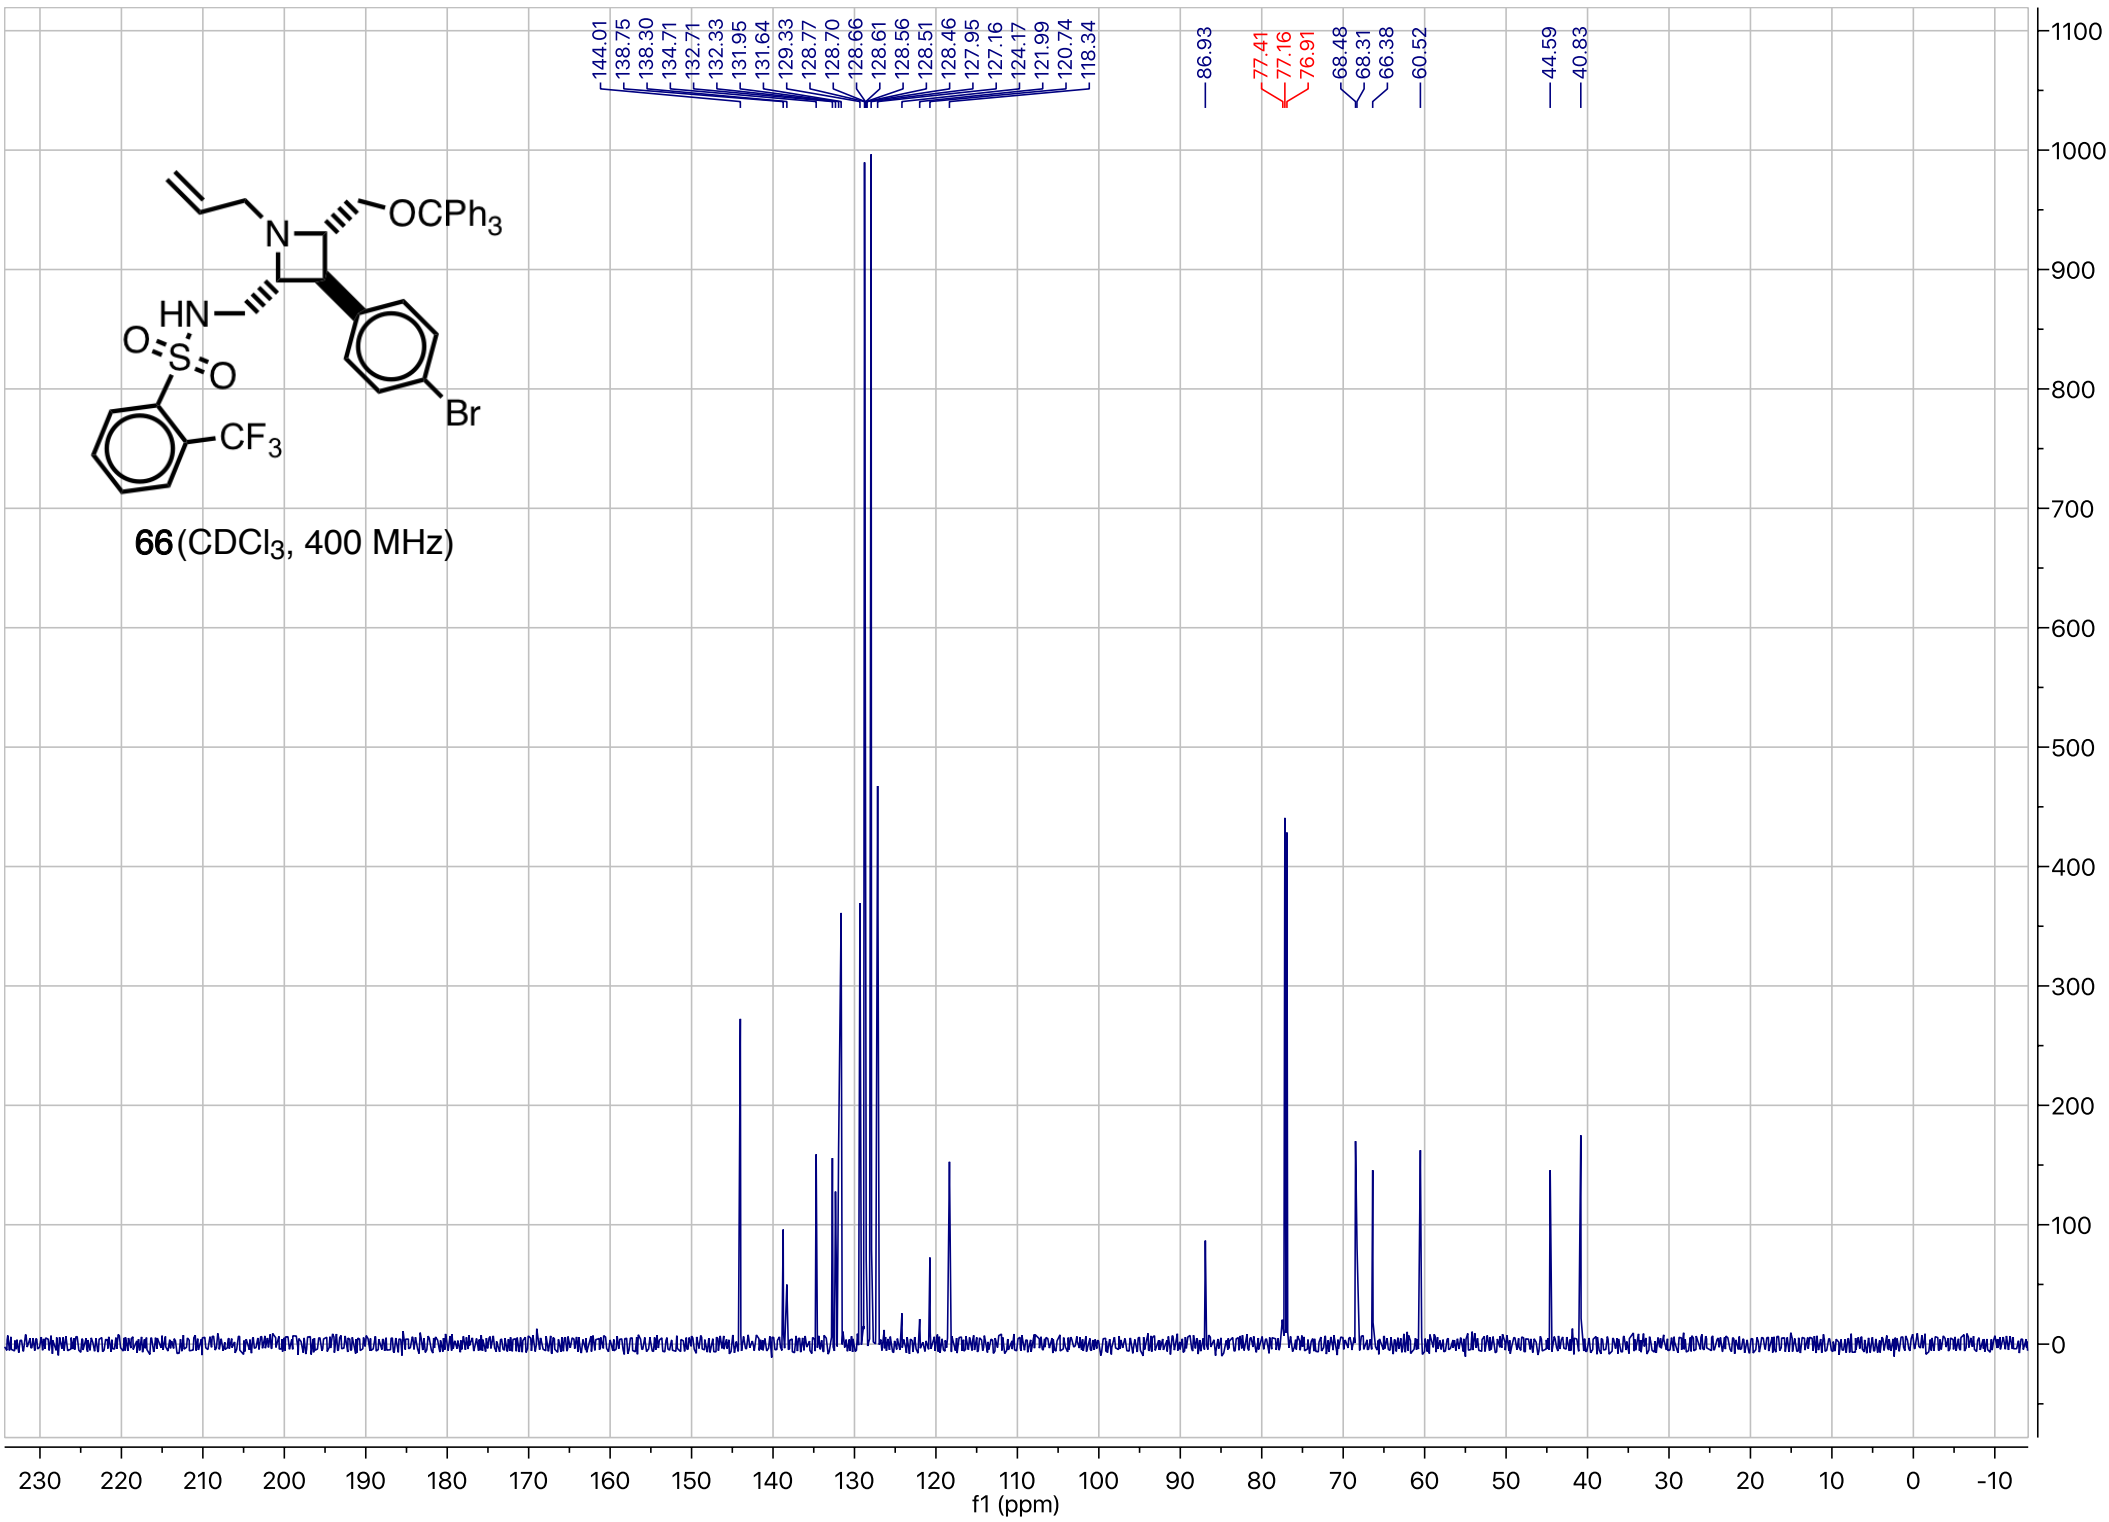

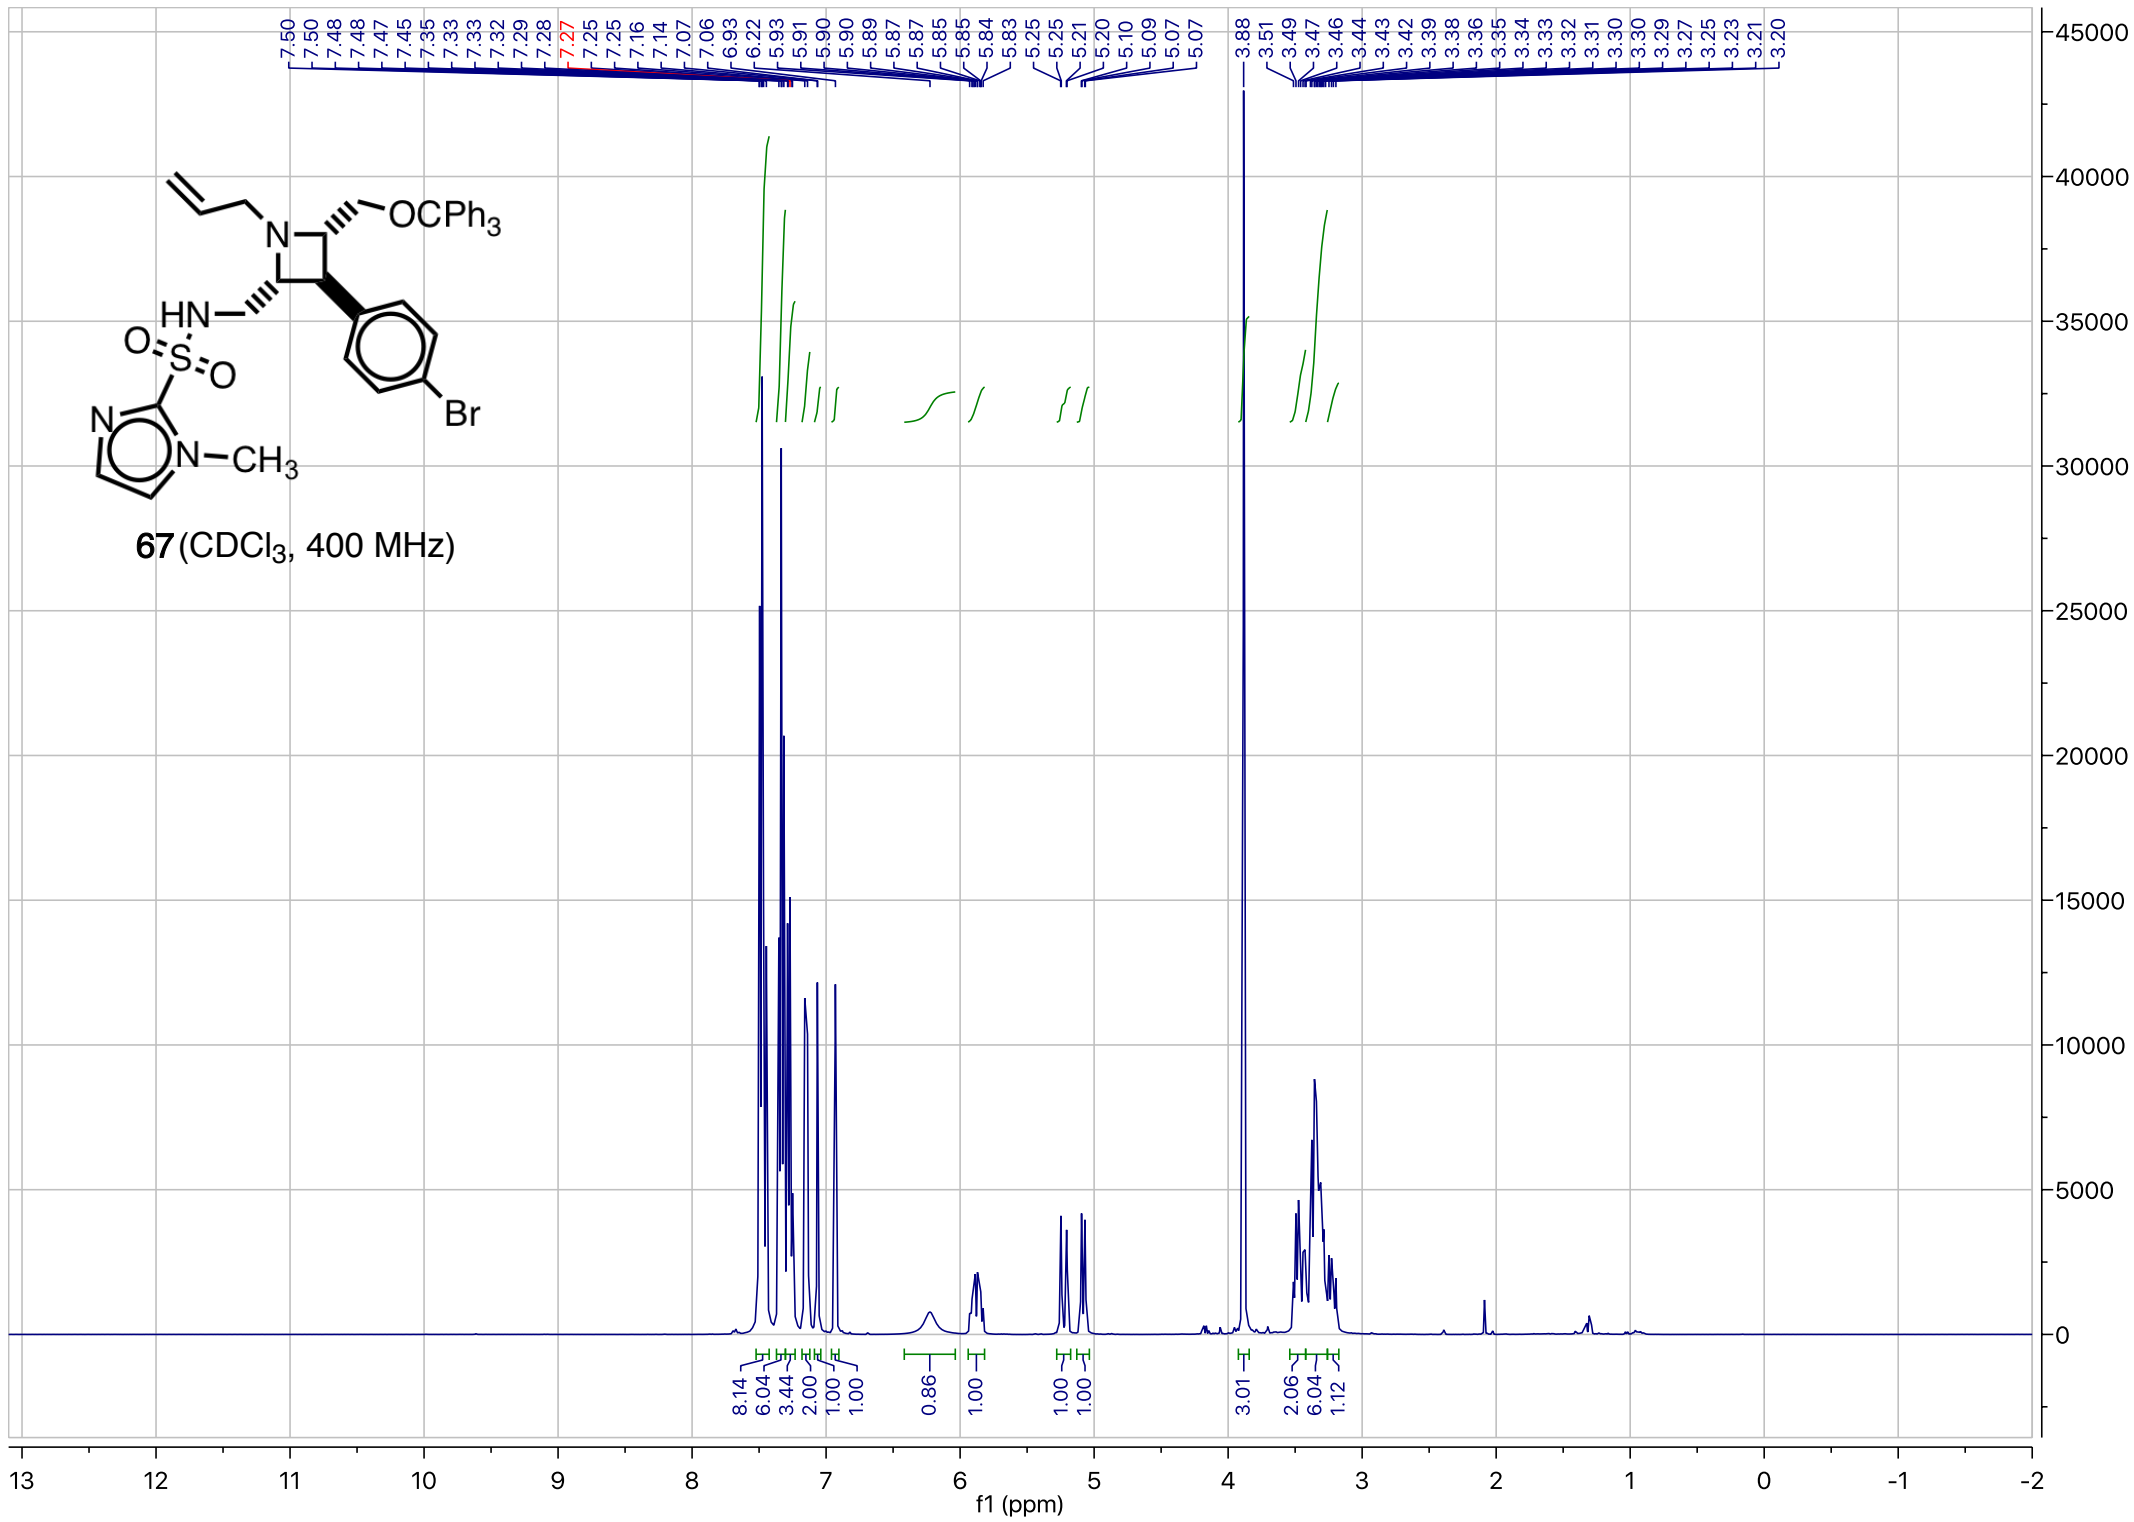

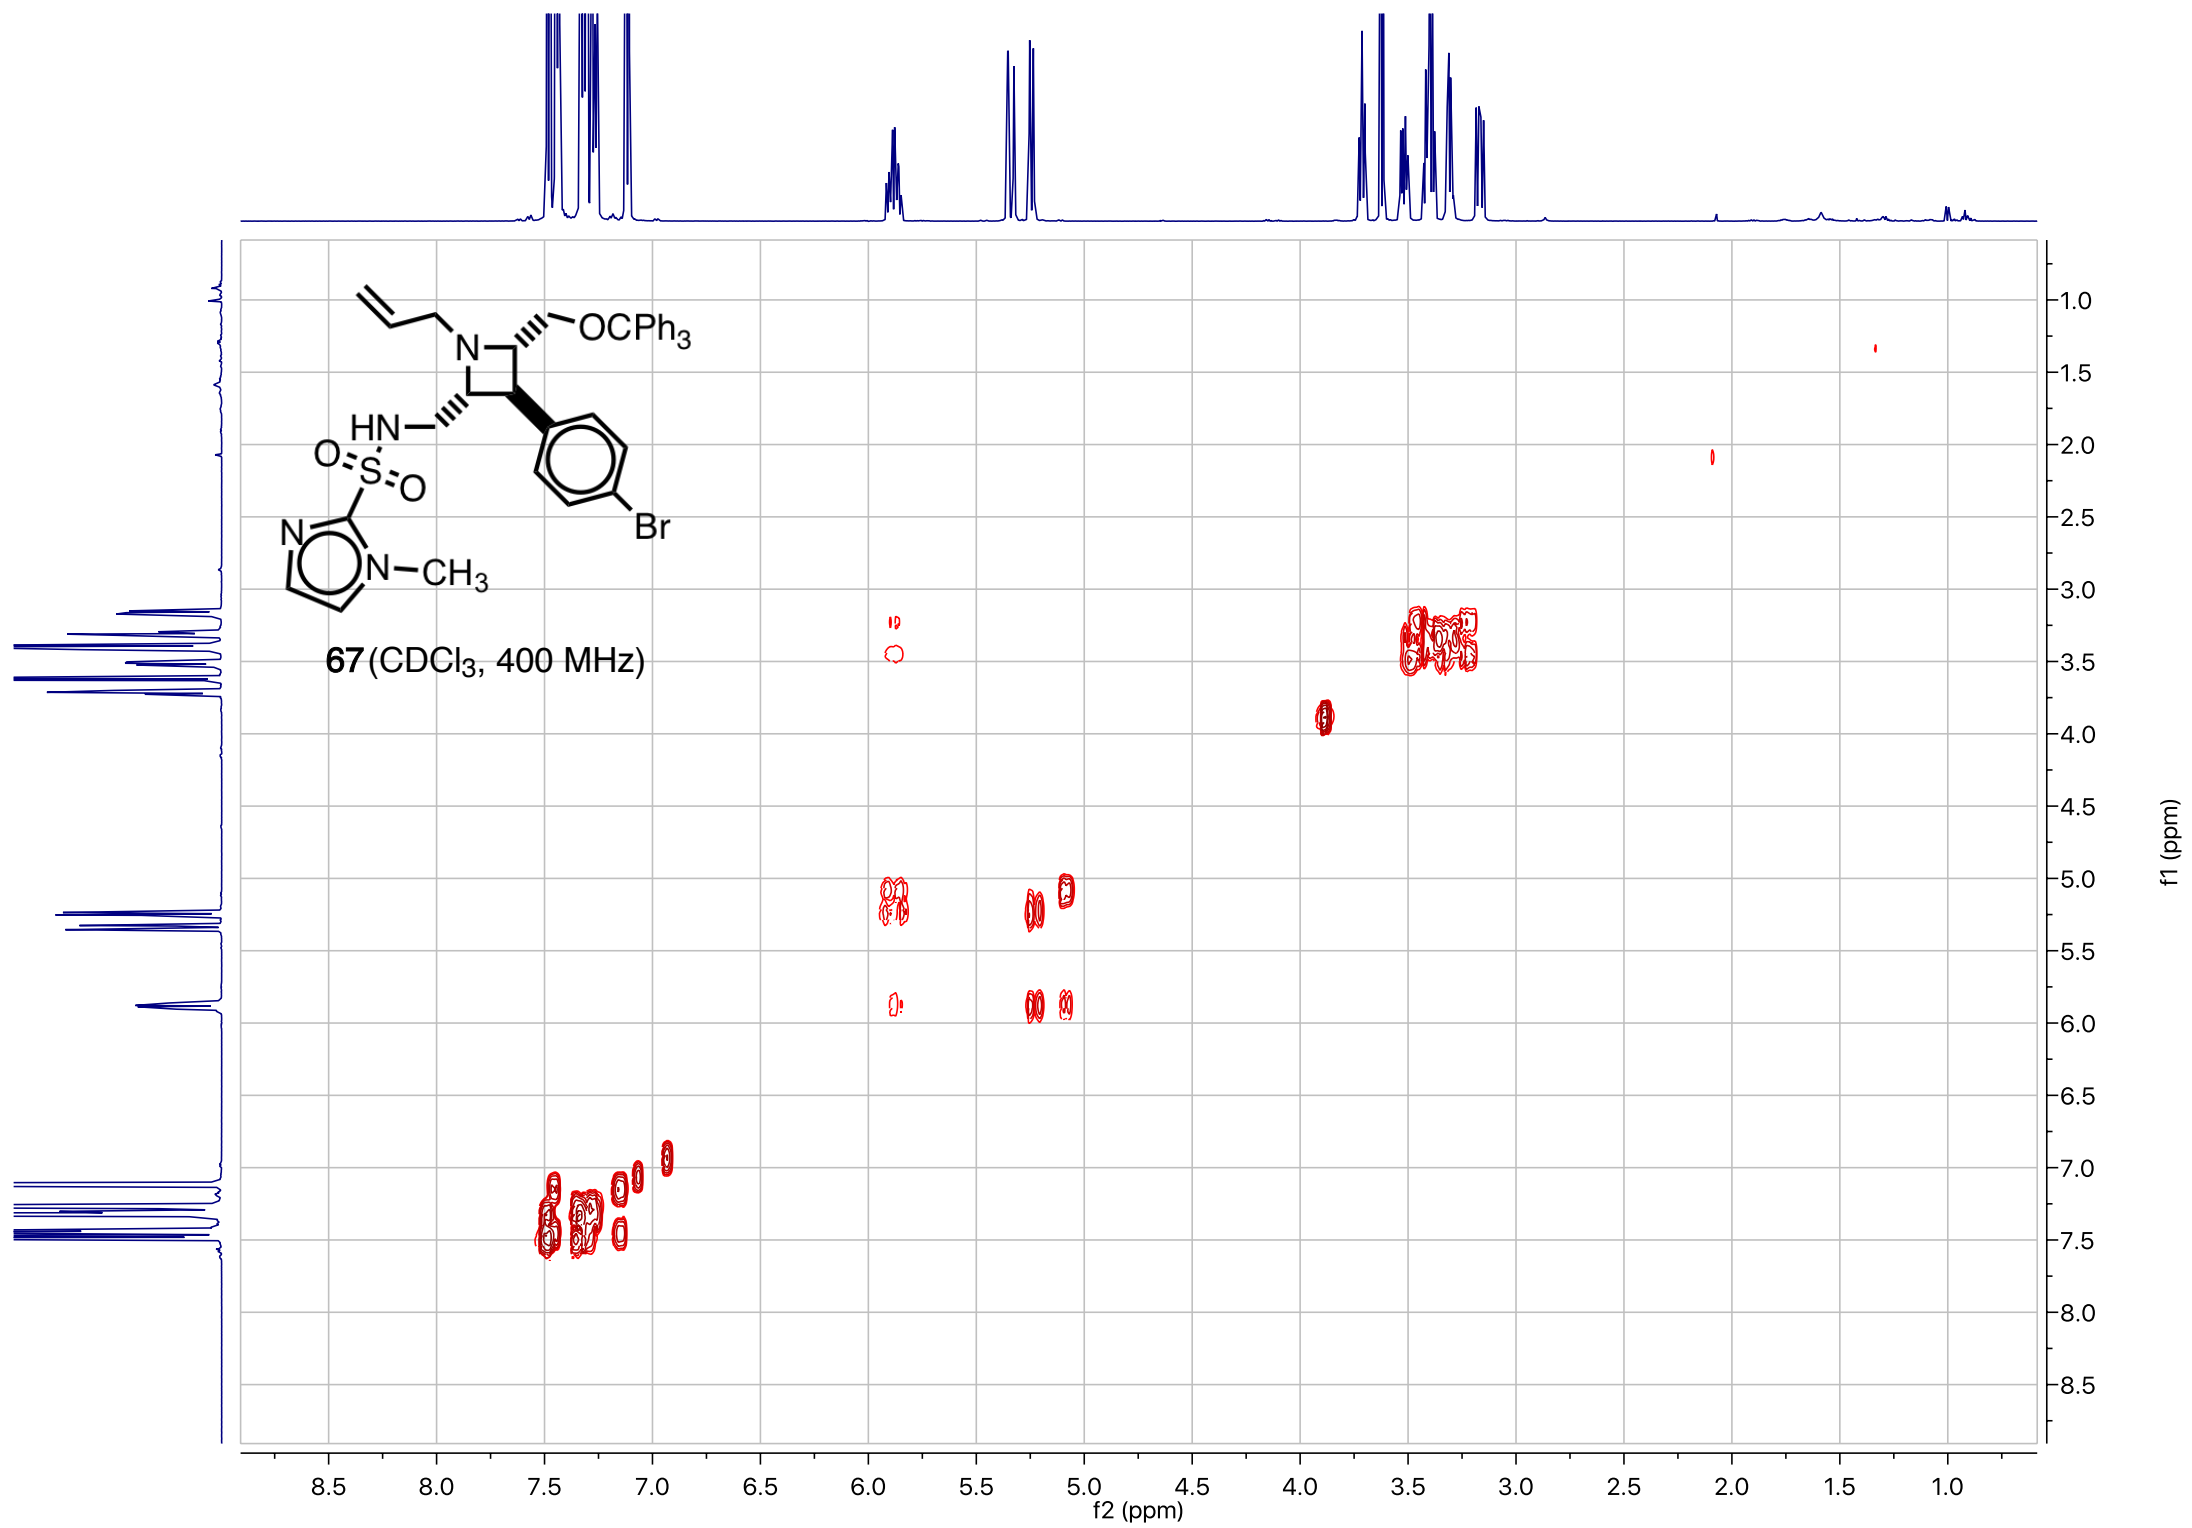

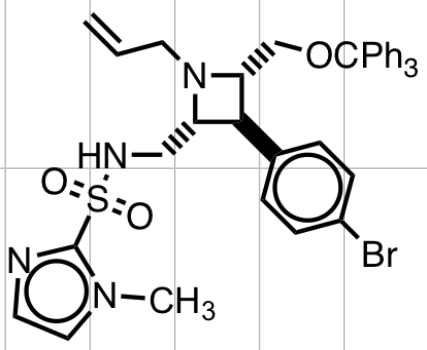

67 (CDCl<sub>3</sub>, 400 MHz)

143.99  
143.41  
139.18  
134.92  
131.50  
129.39  
128.73  
128.13  
127.87  
127.06  
124.69  
120.52  
118.29

86.85  
77.48  
77.16  
76.84  
68.23  
67.97  
66.41  
60.30

45.43  
40.93  
34.84

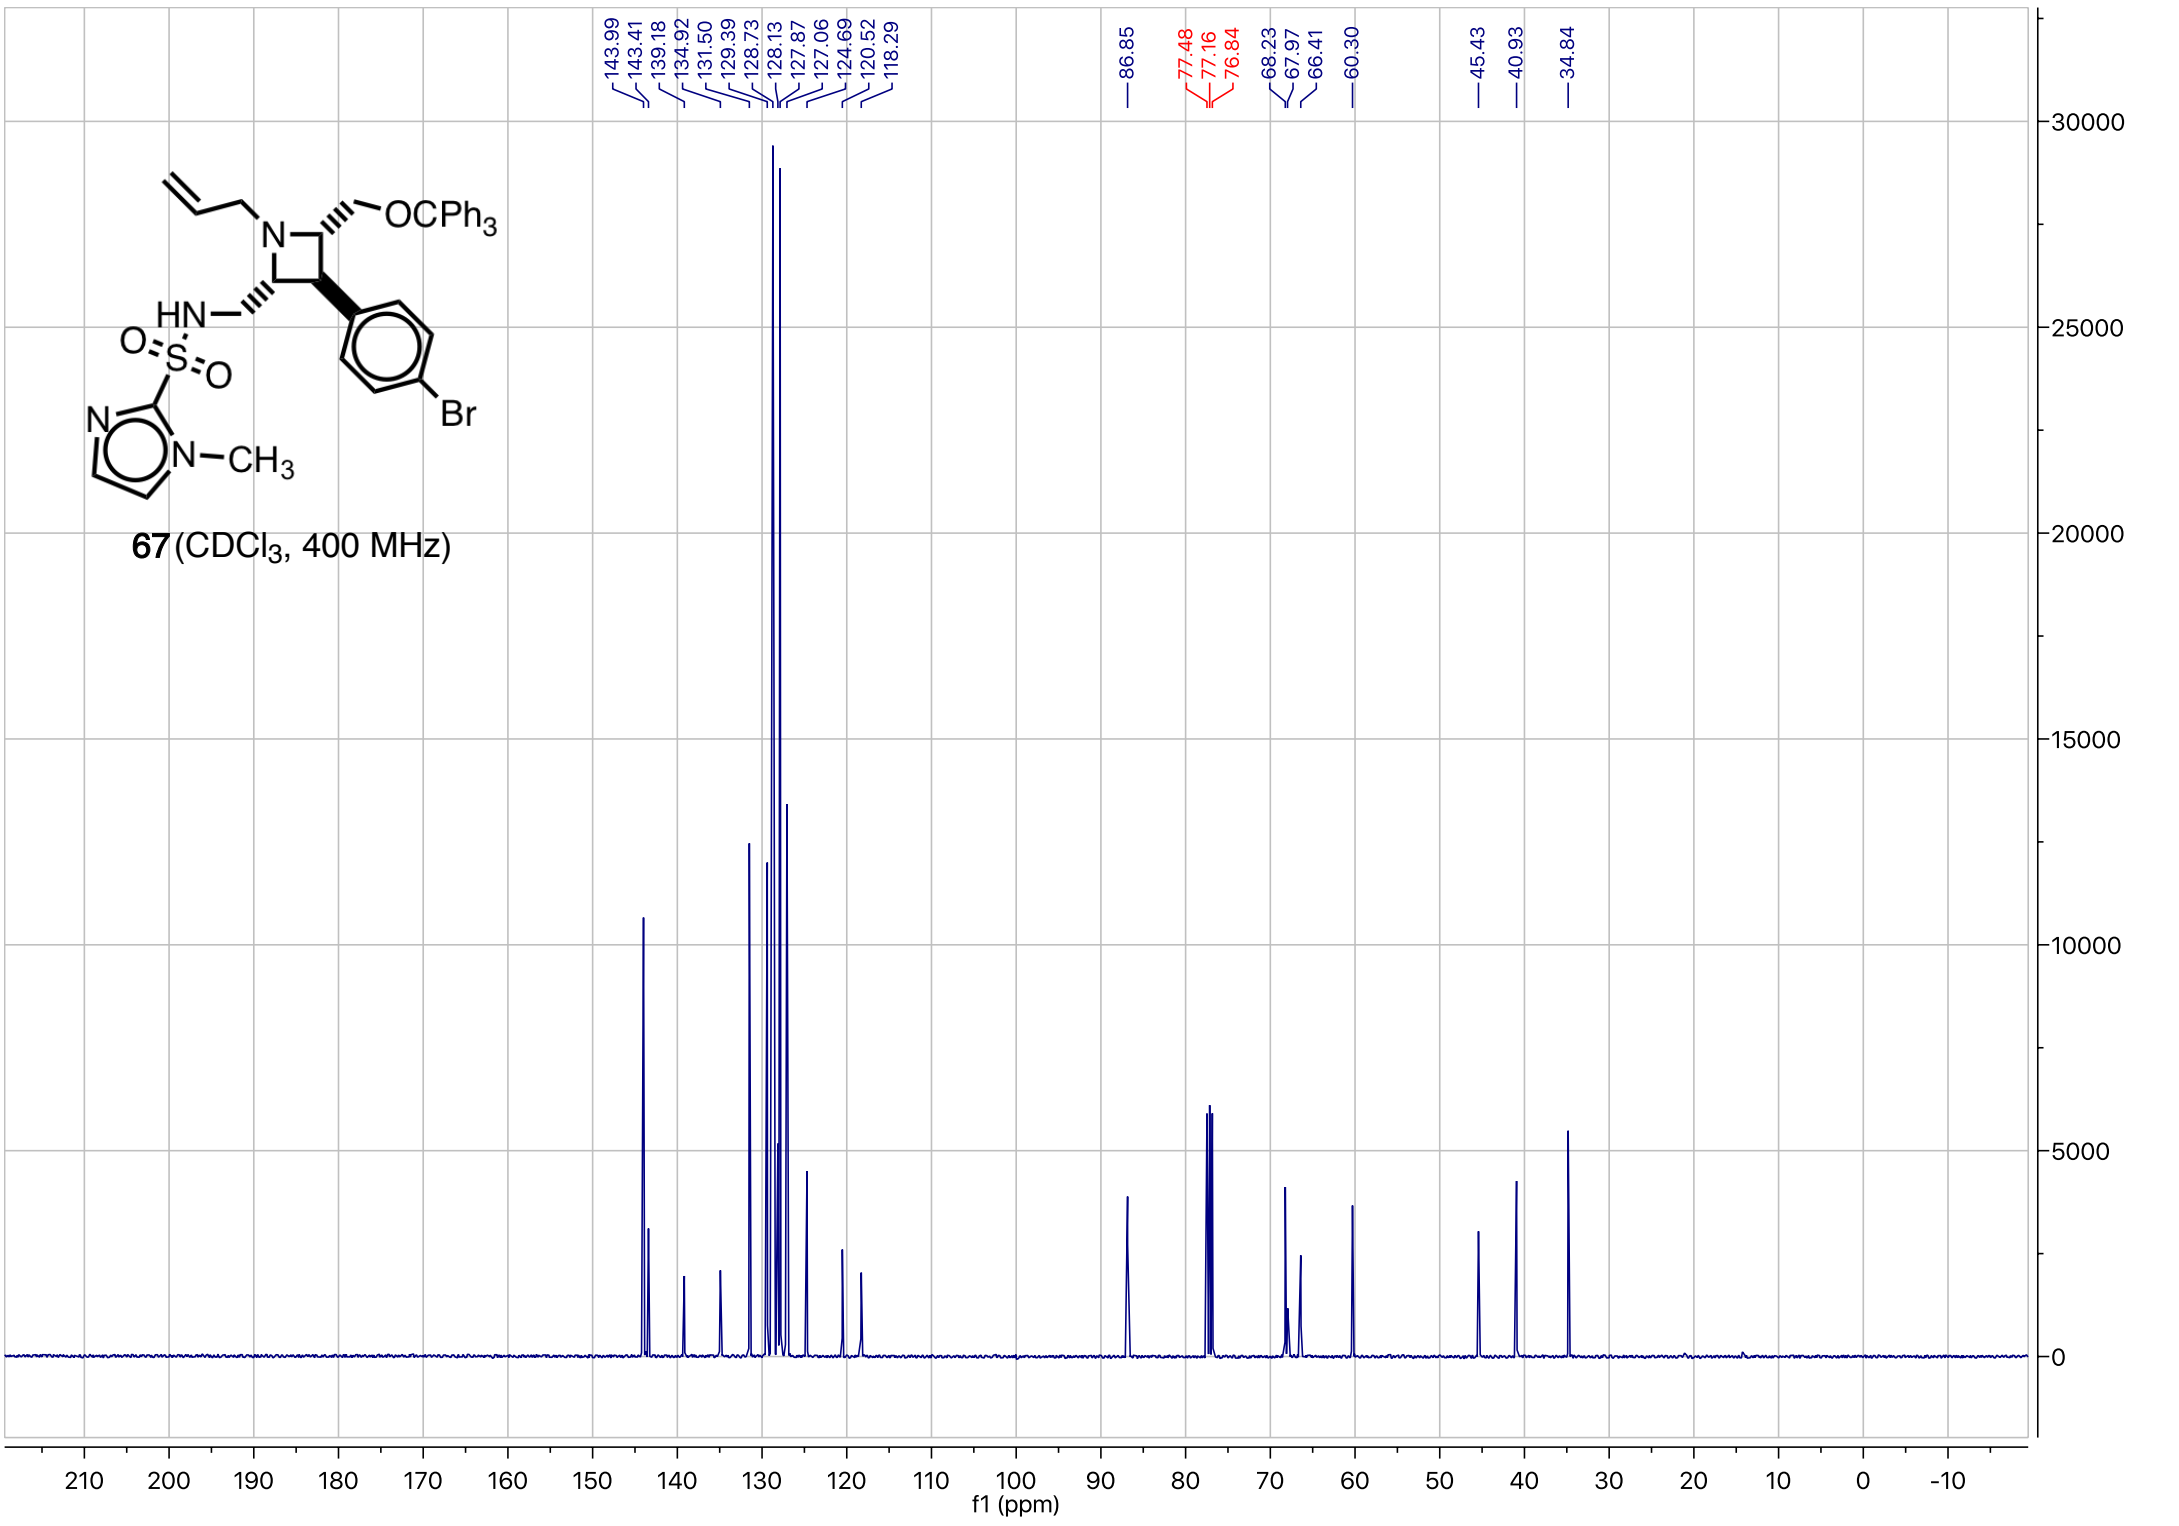

210 200 190 180 170 160 150 140 130 120 110 100 90 80 70 60 50 40 30 20 10 0 -10  
f1 (ppm)

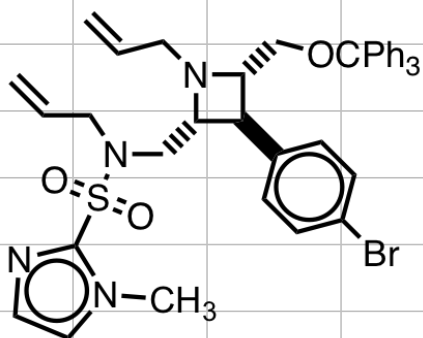

68 (CDCl<sub>3</sub>, 400 MHz)

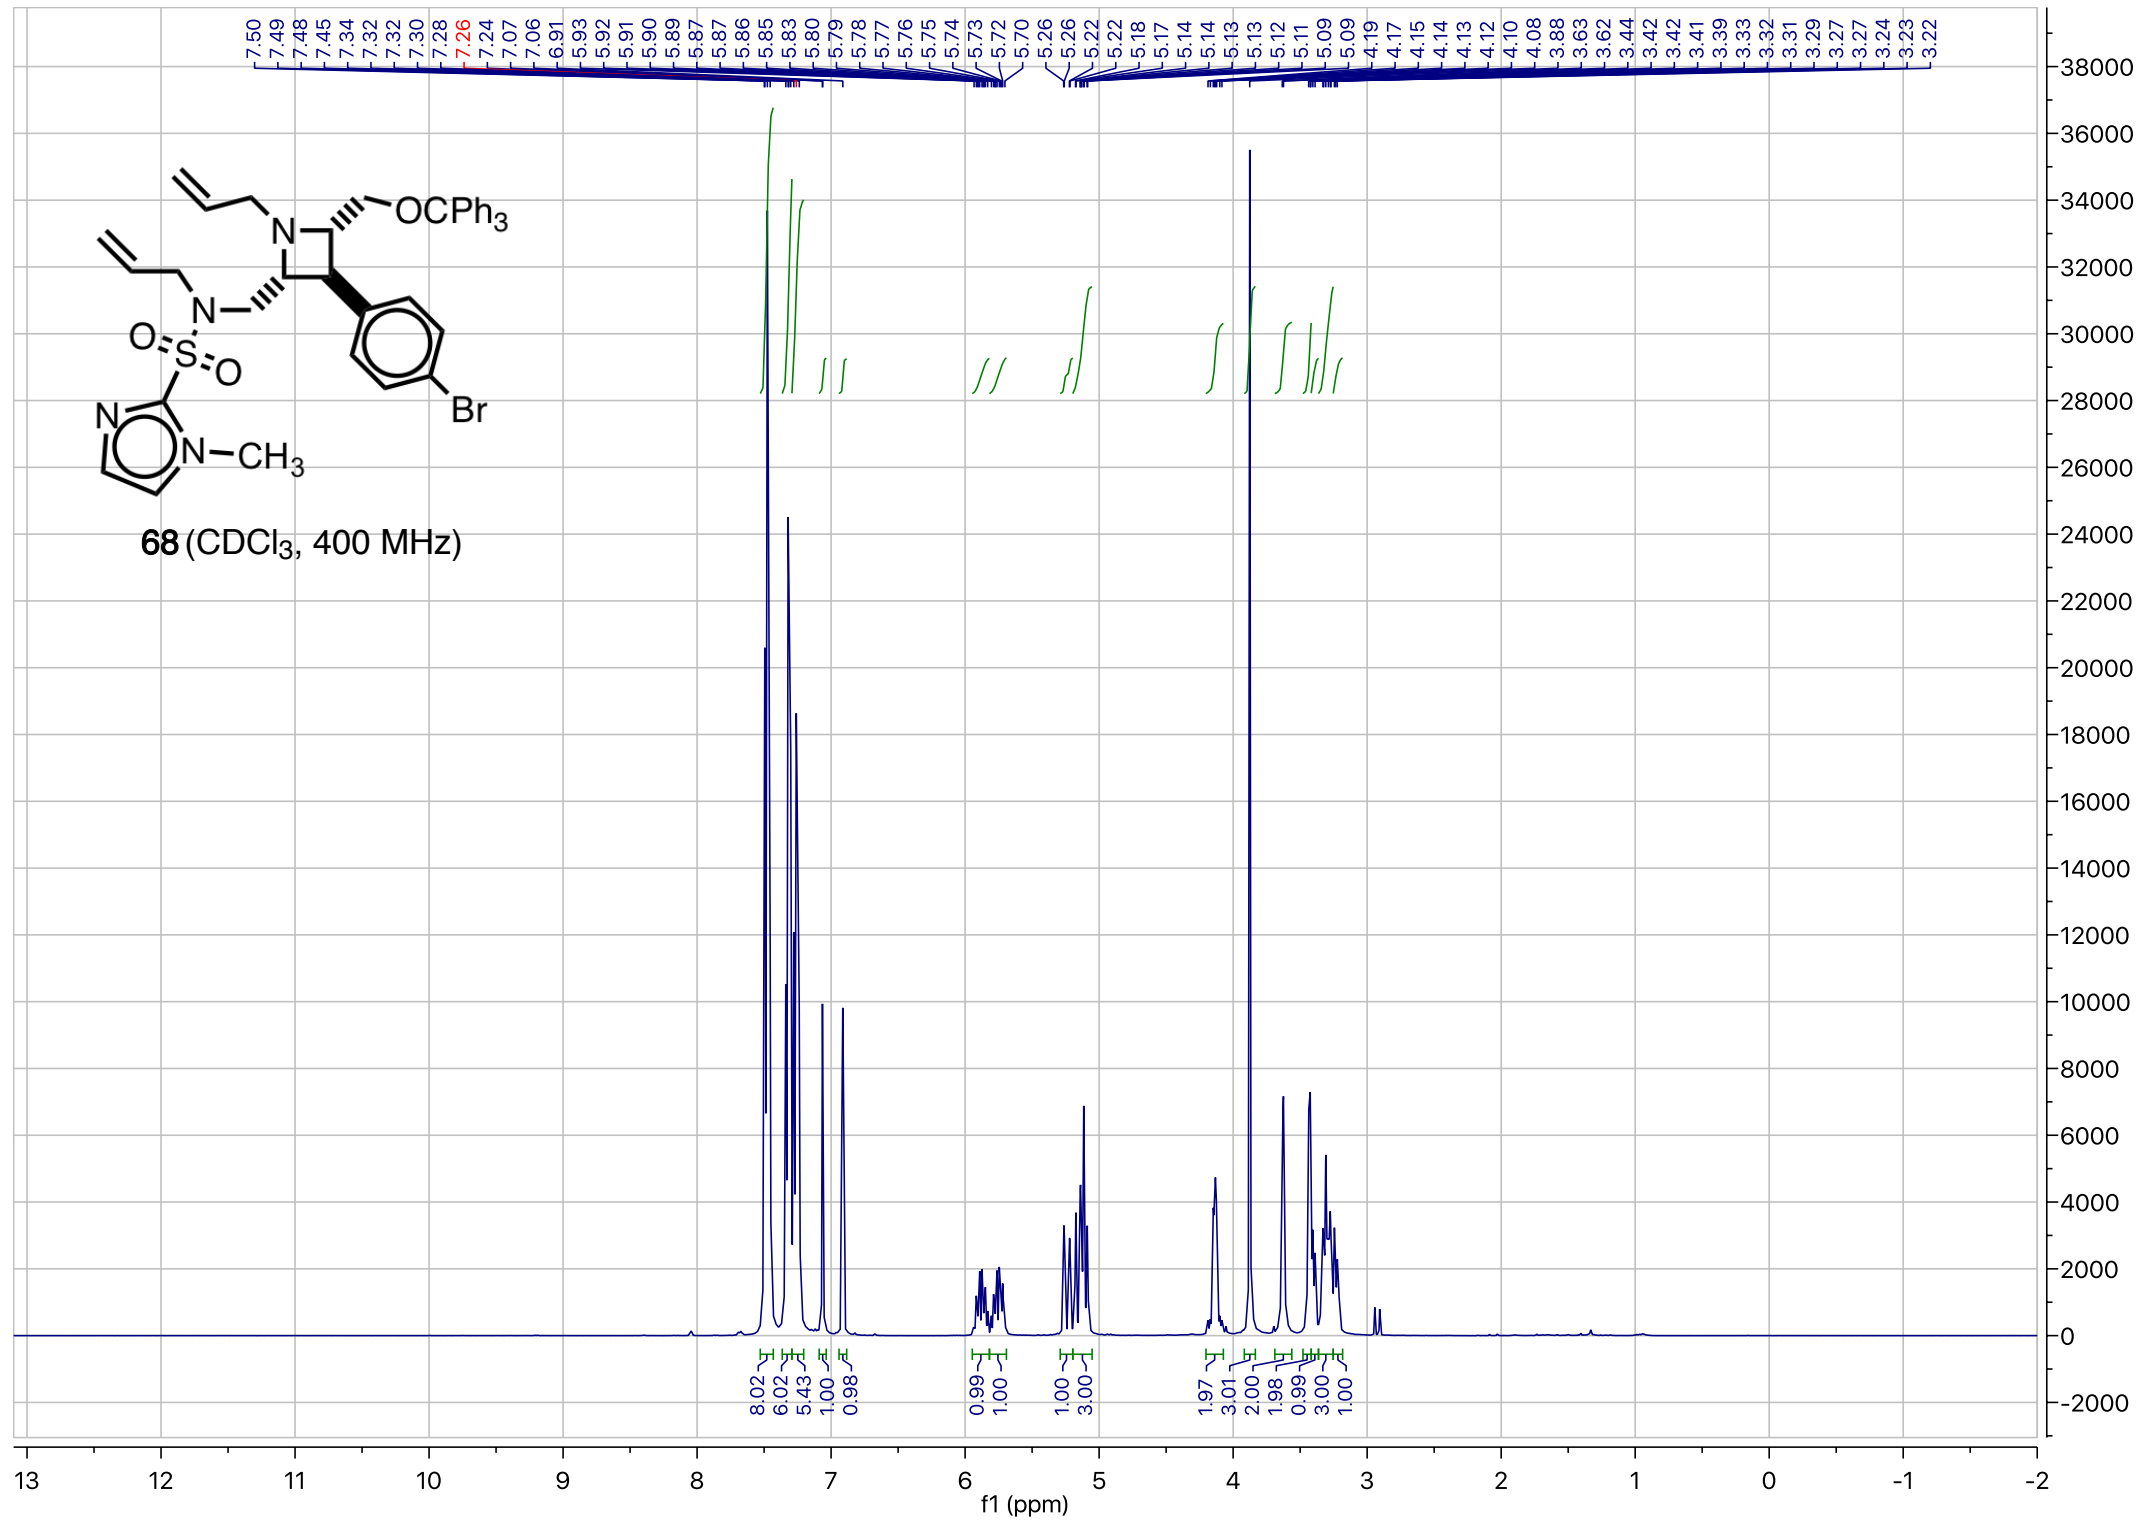

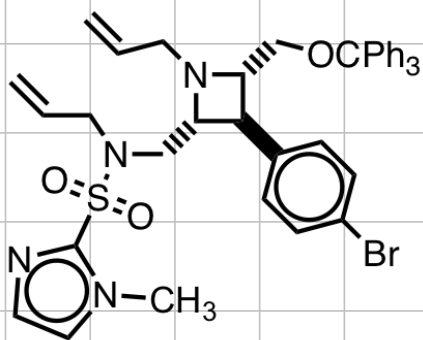

68 (CDCl<sub>3</sub>, 400 MHz)

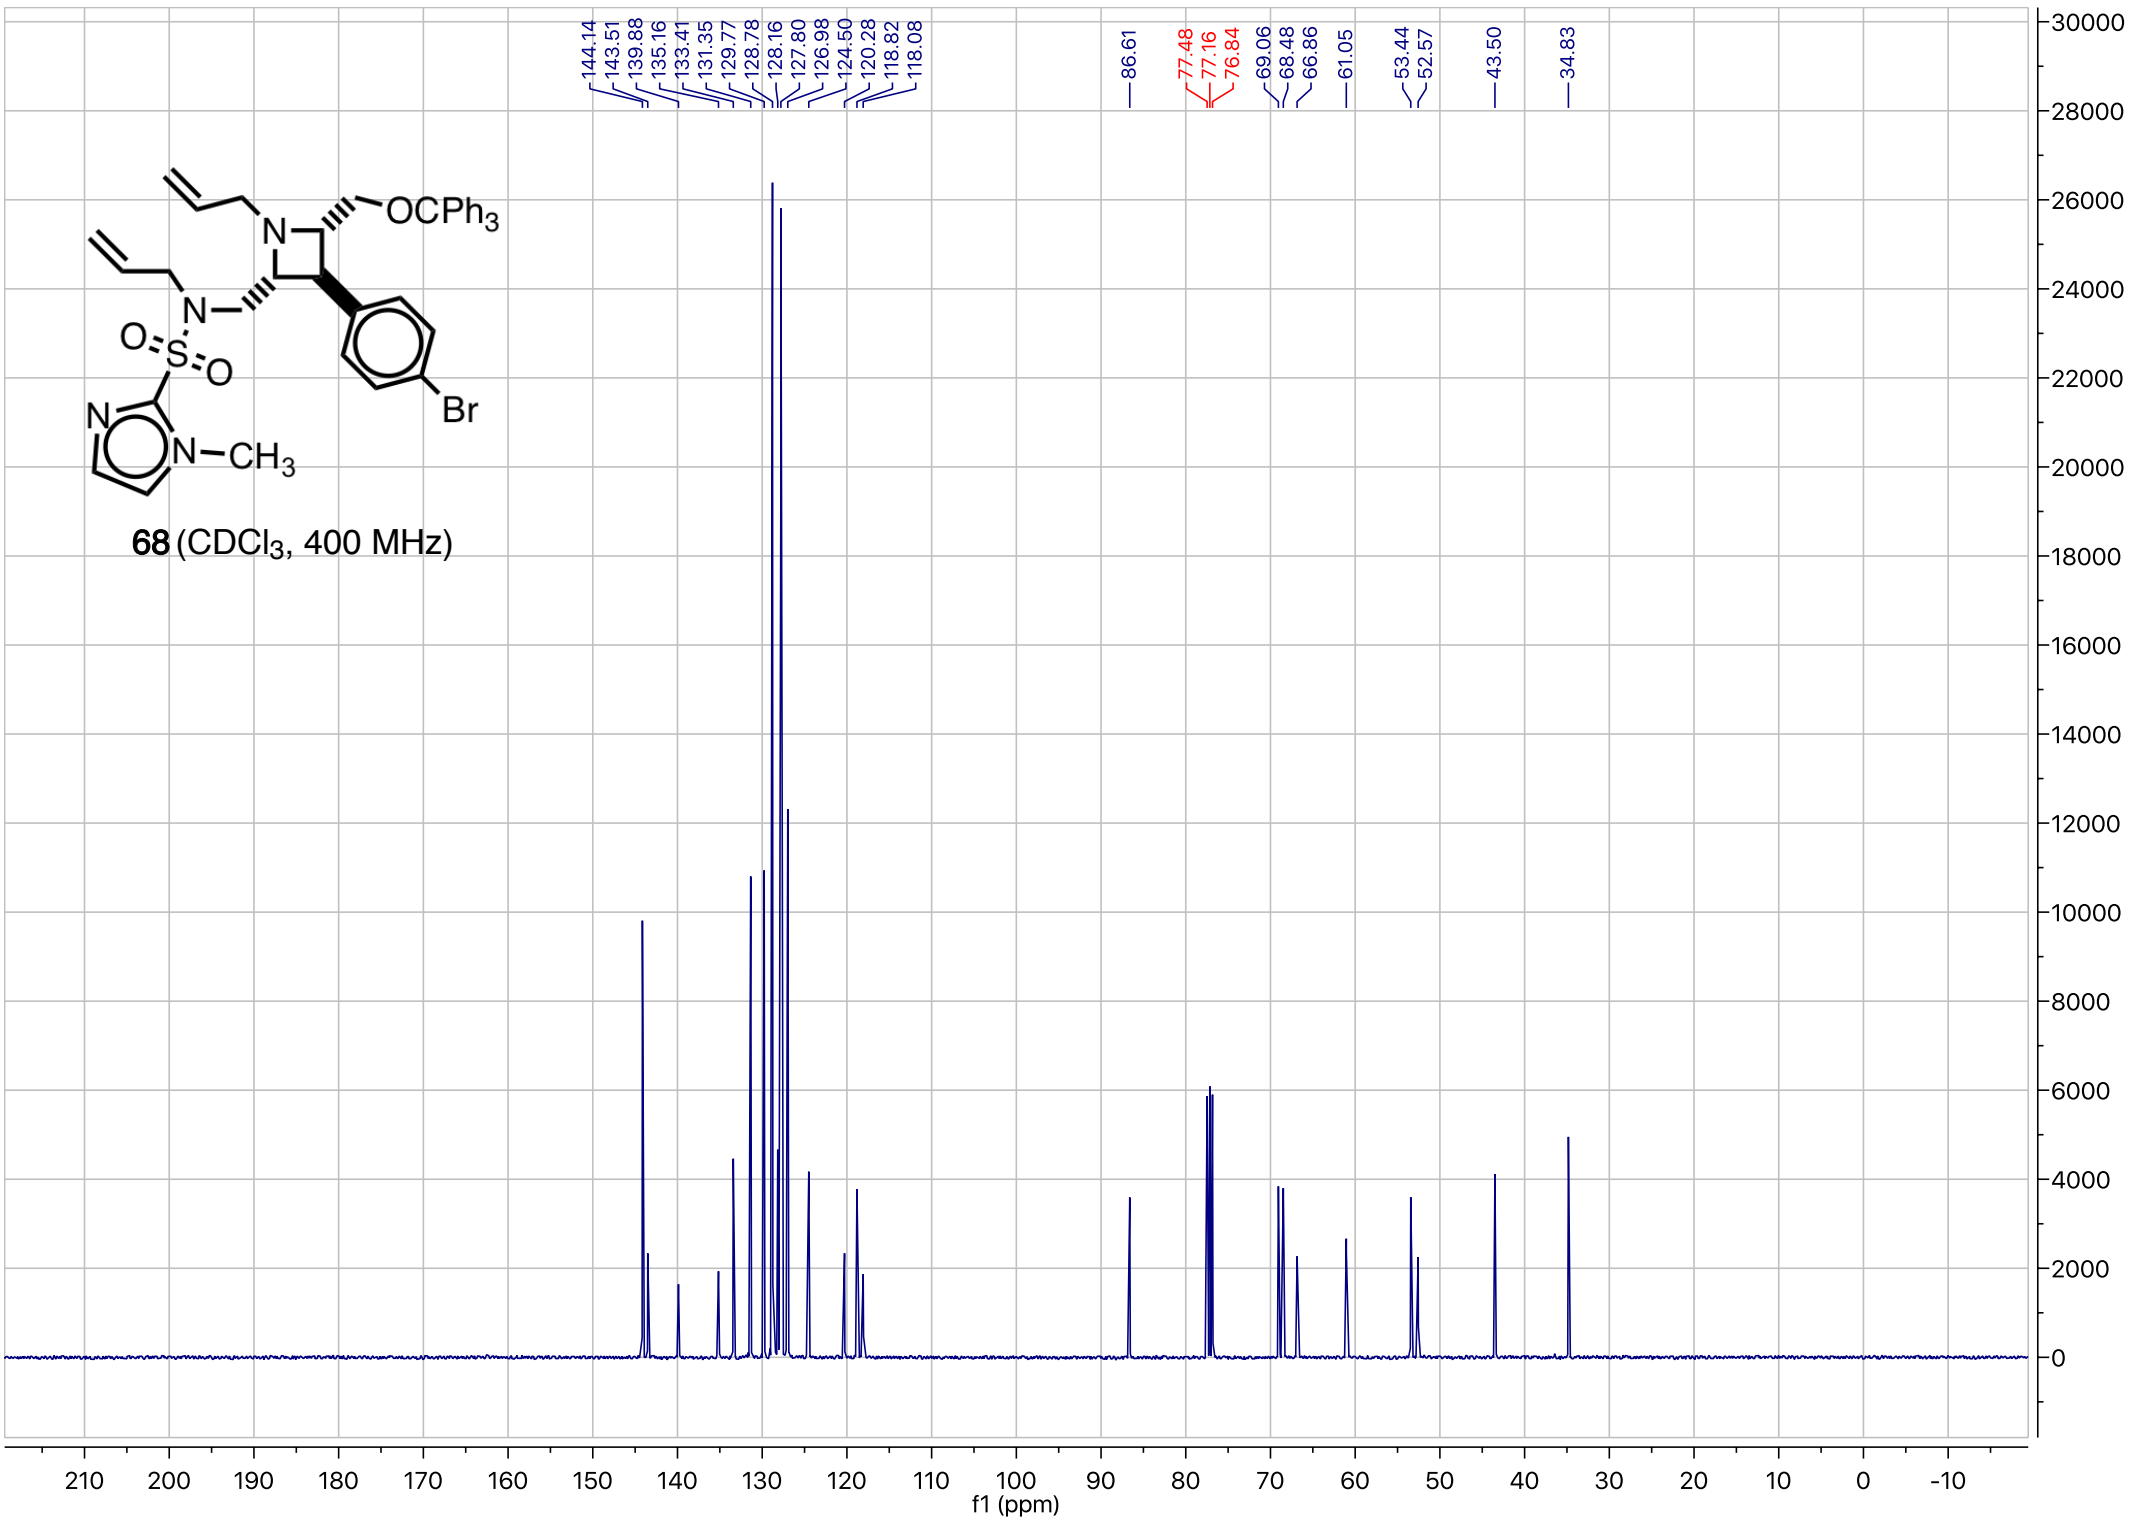

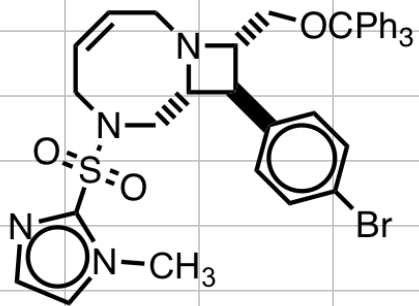

69 (CDCl<sub>3</sub>, 400 MHz)

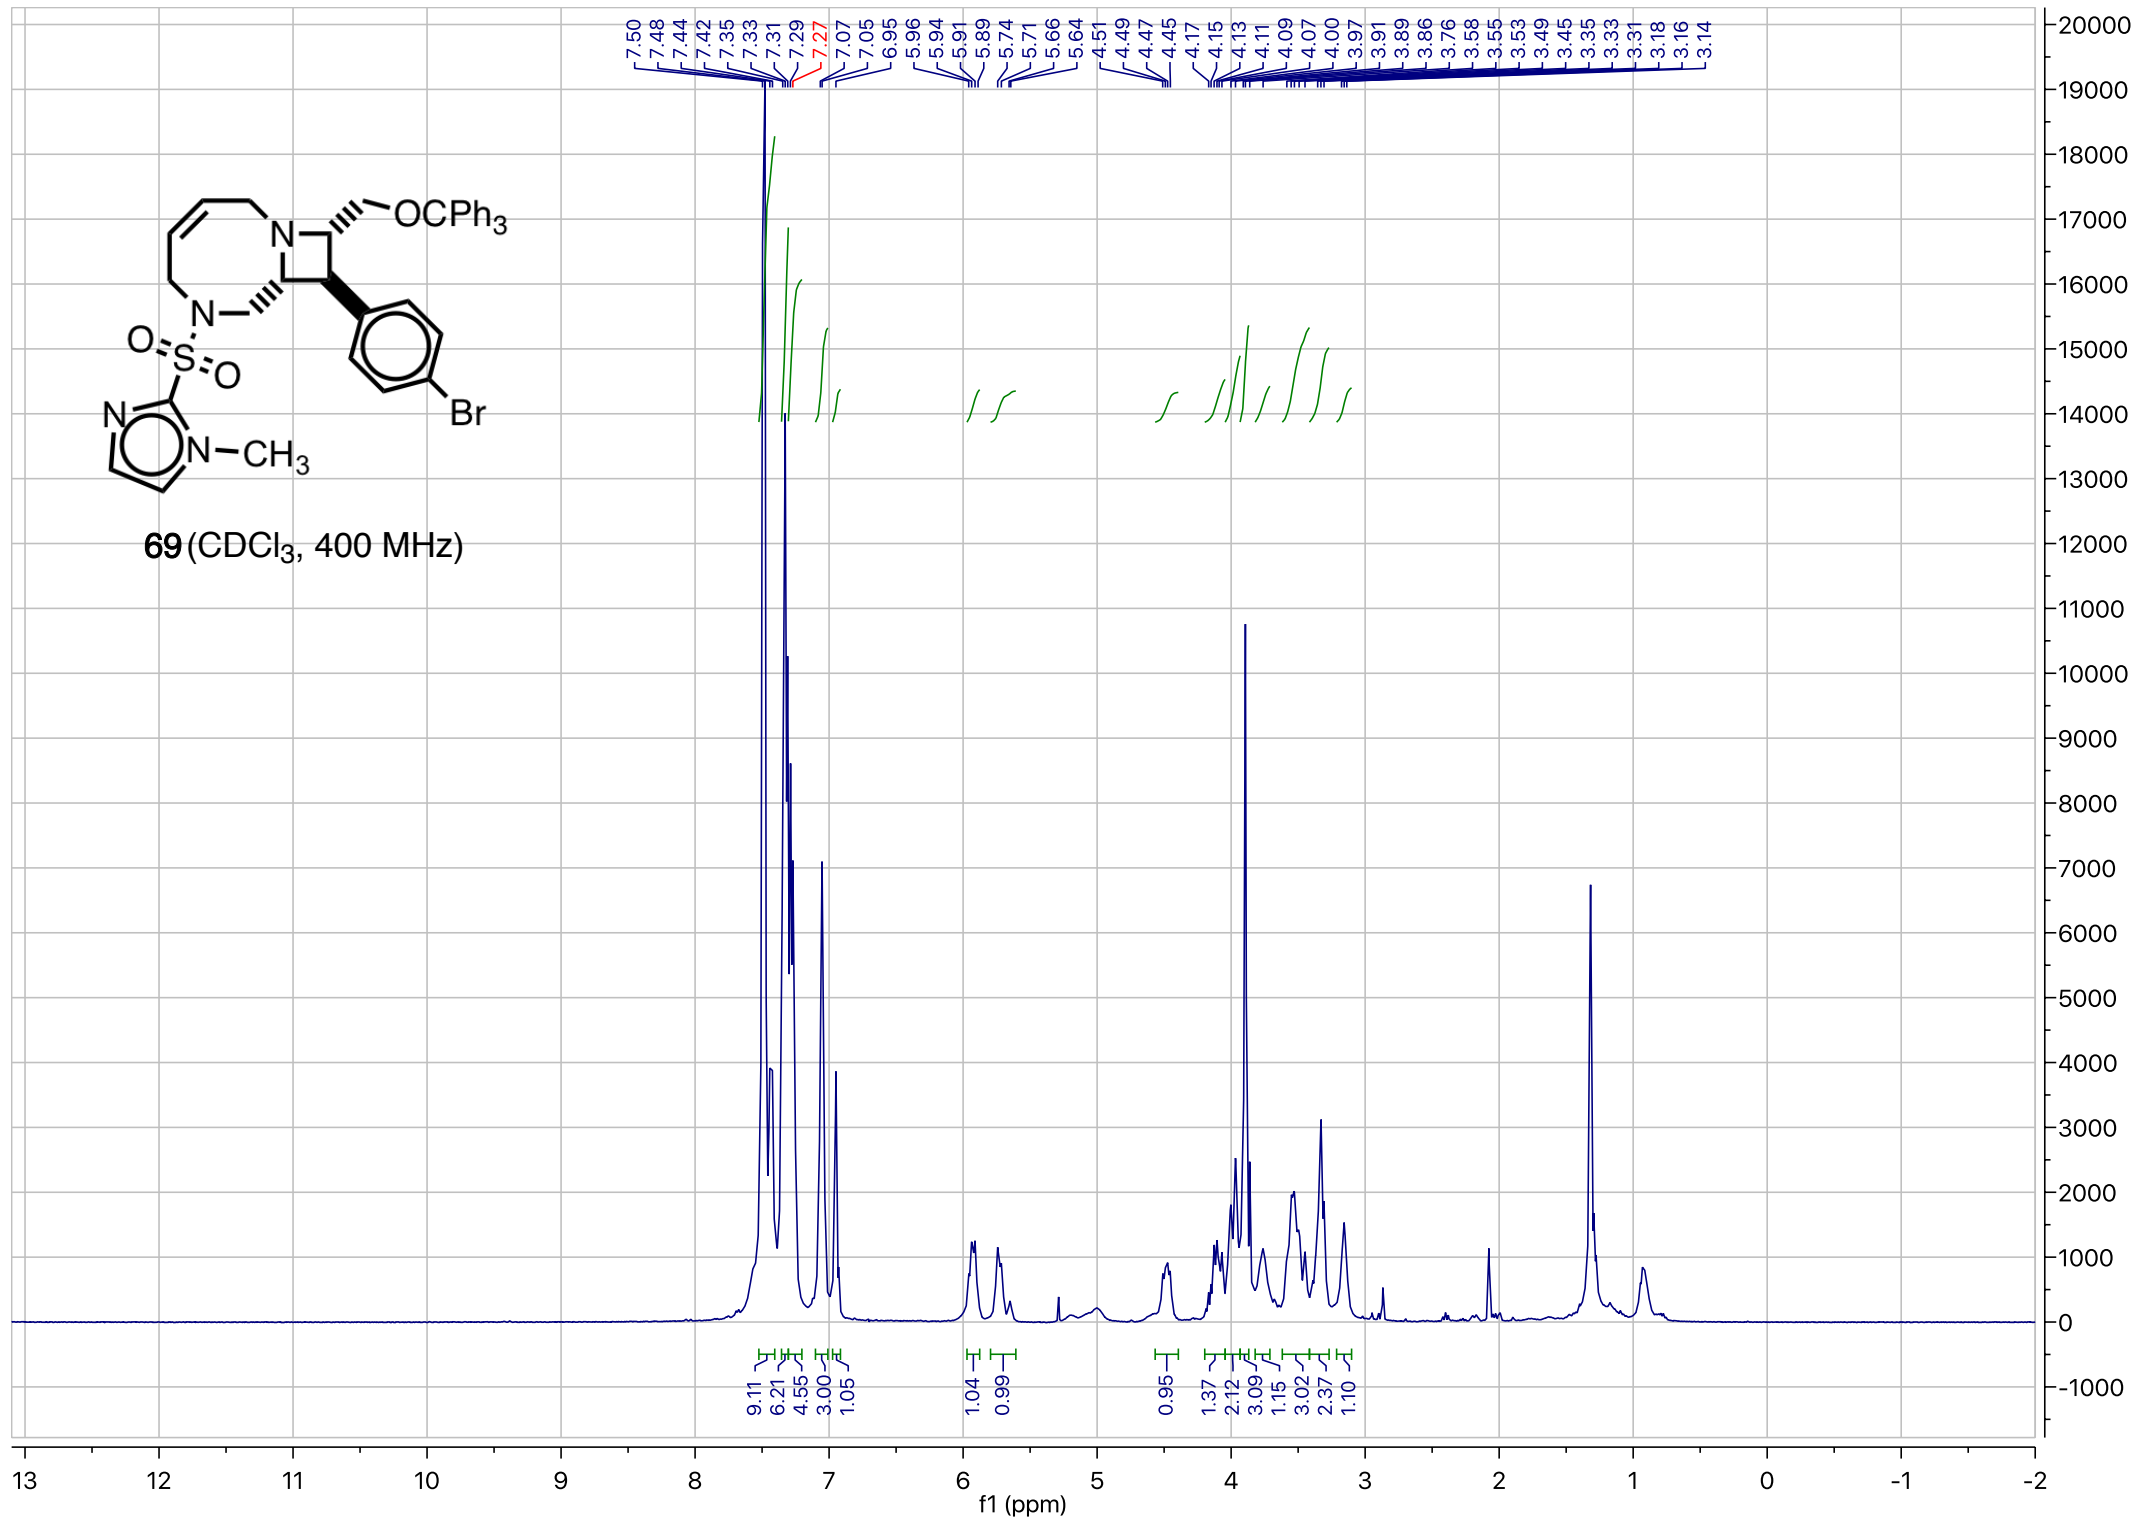



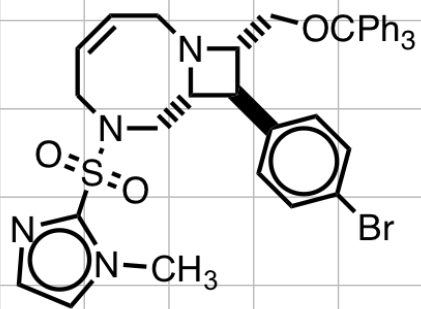

69 (CDCl<sub>3</sub>, 400 MHz)

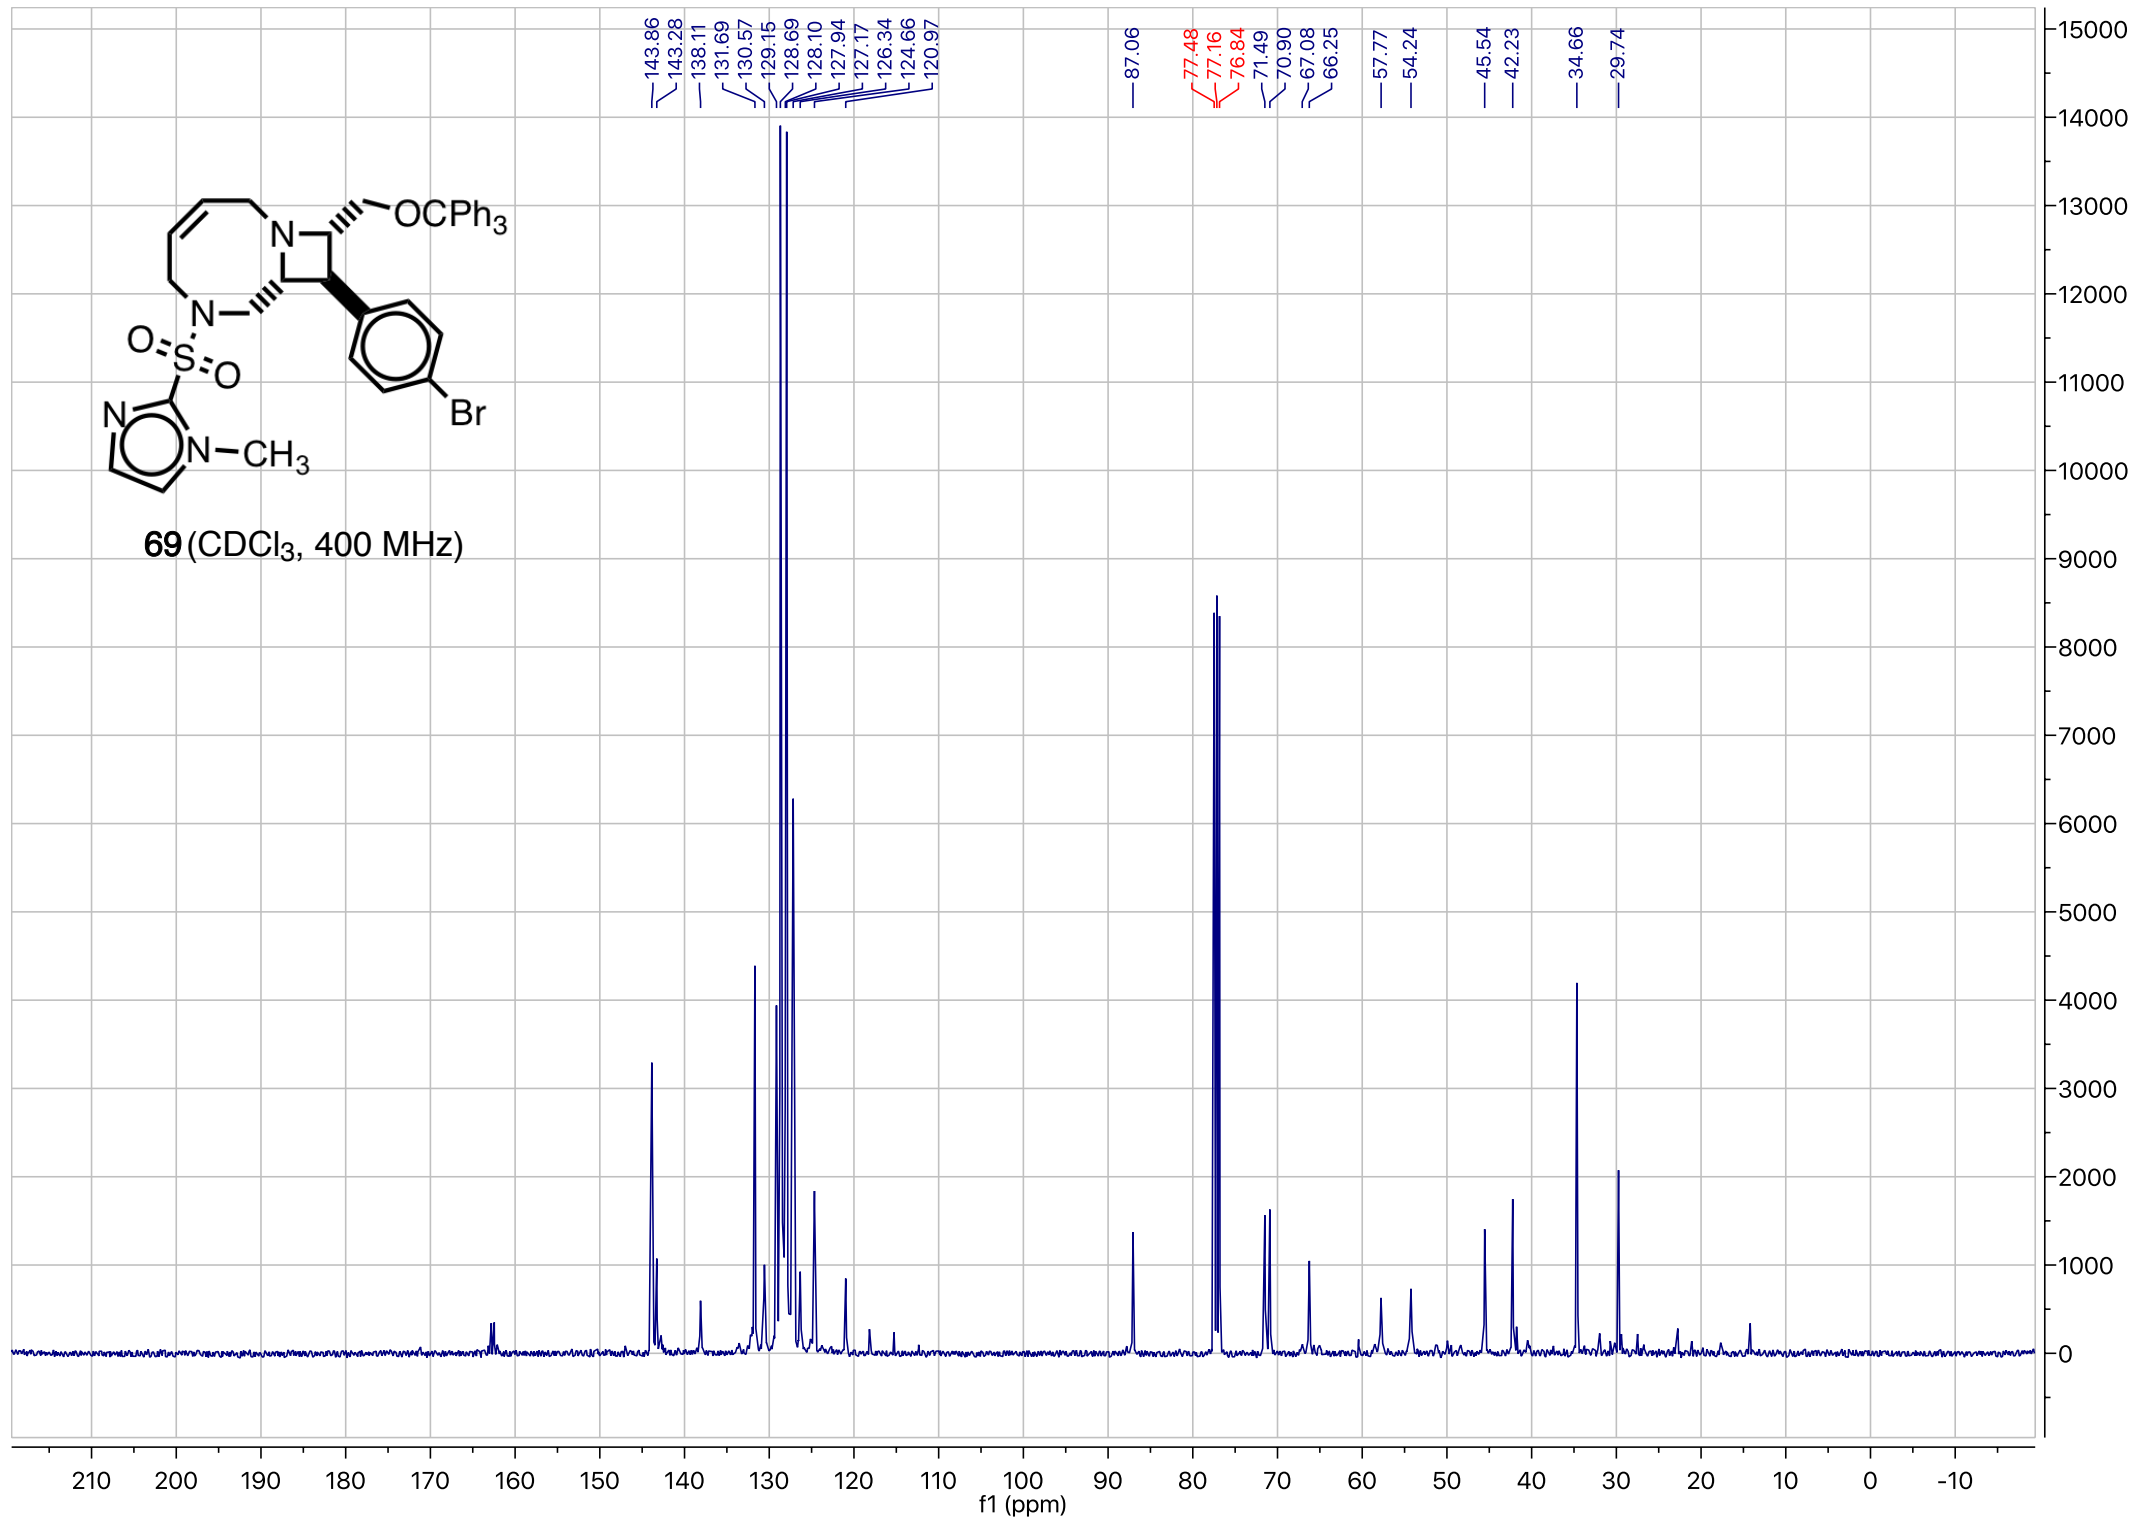

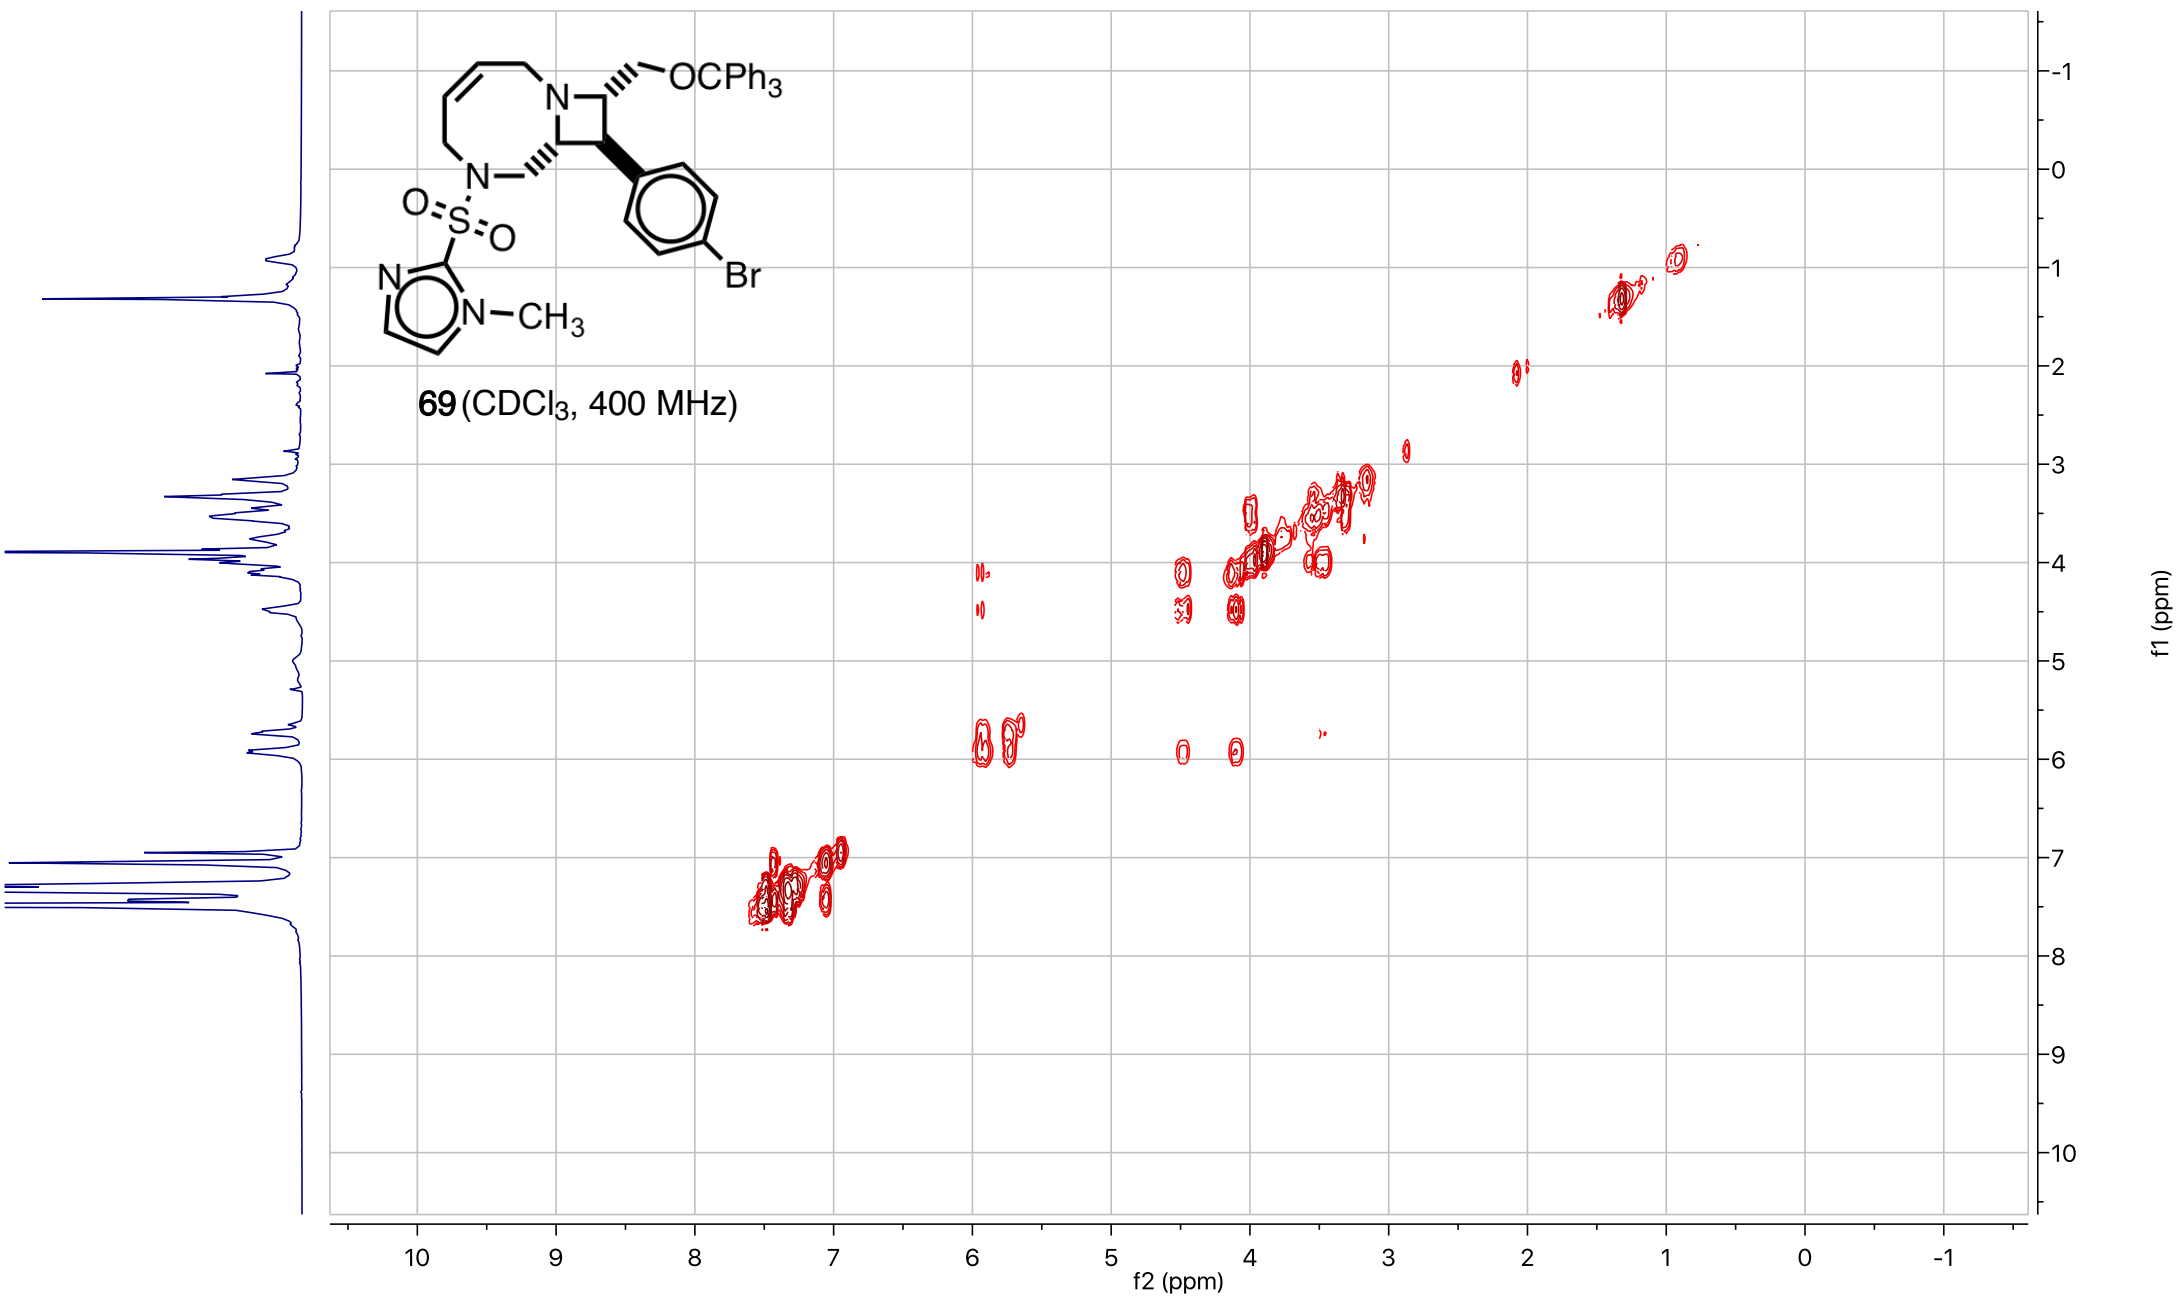

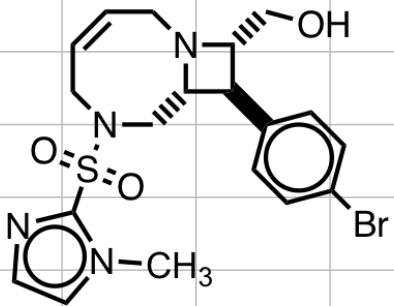

70 (CDCl<sub>3</sub>, 400 MHz)

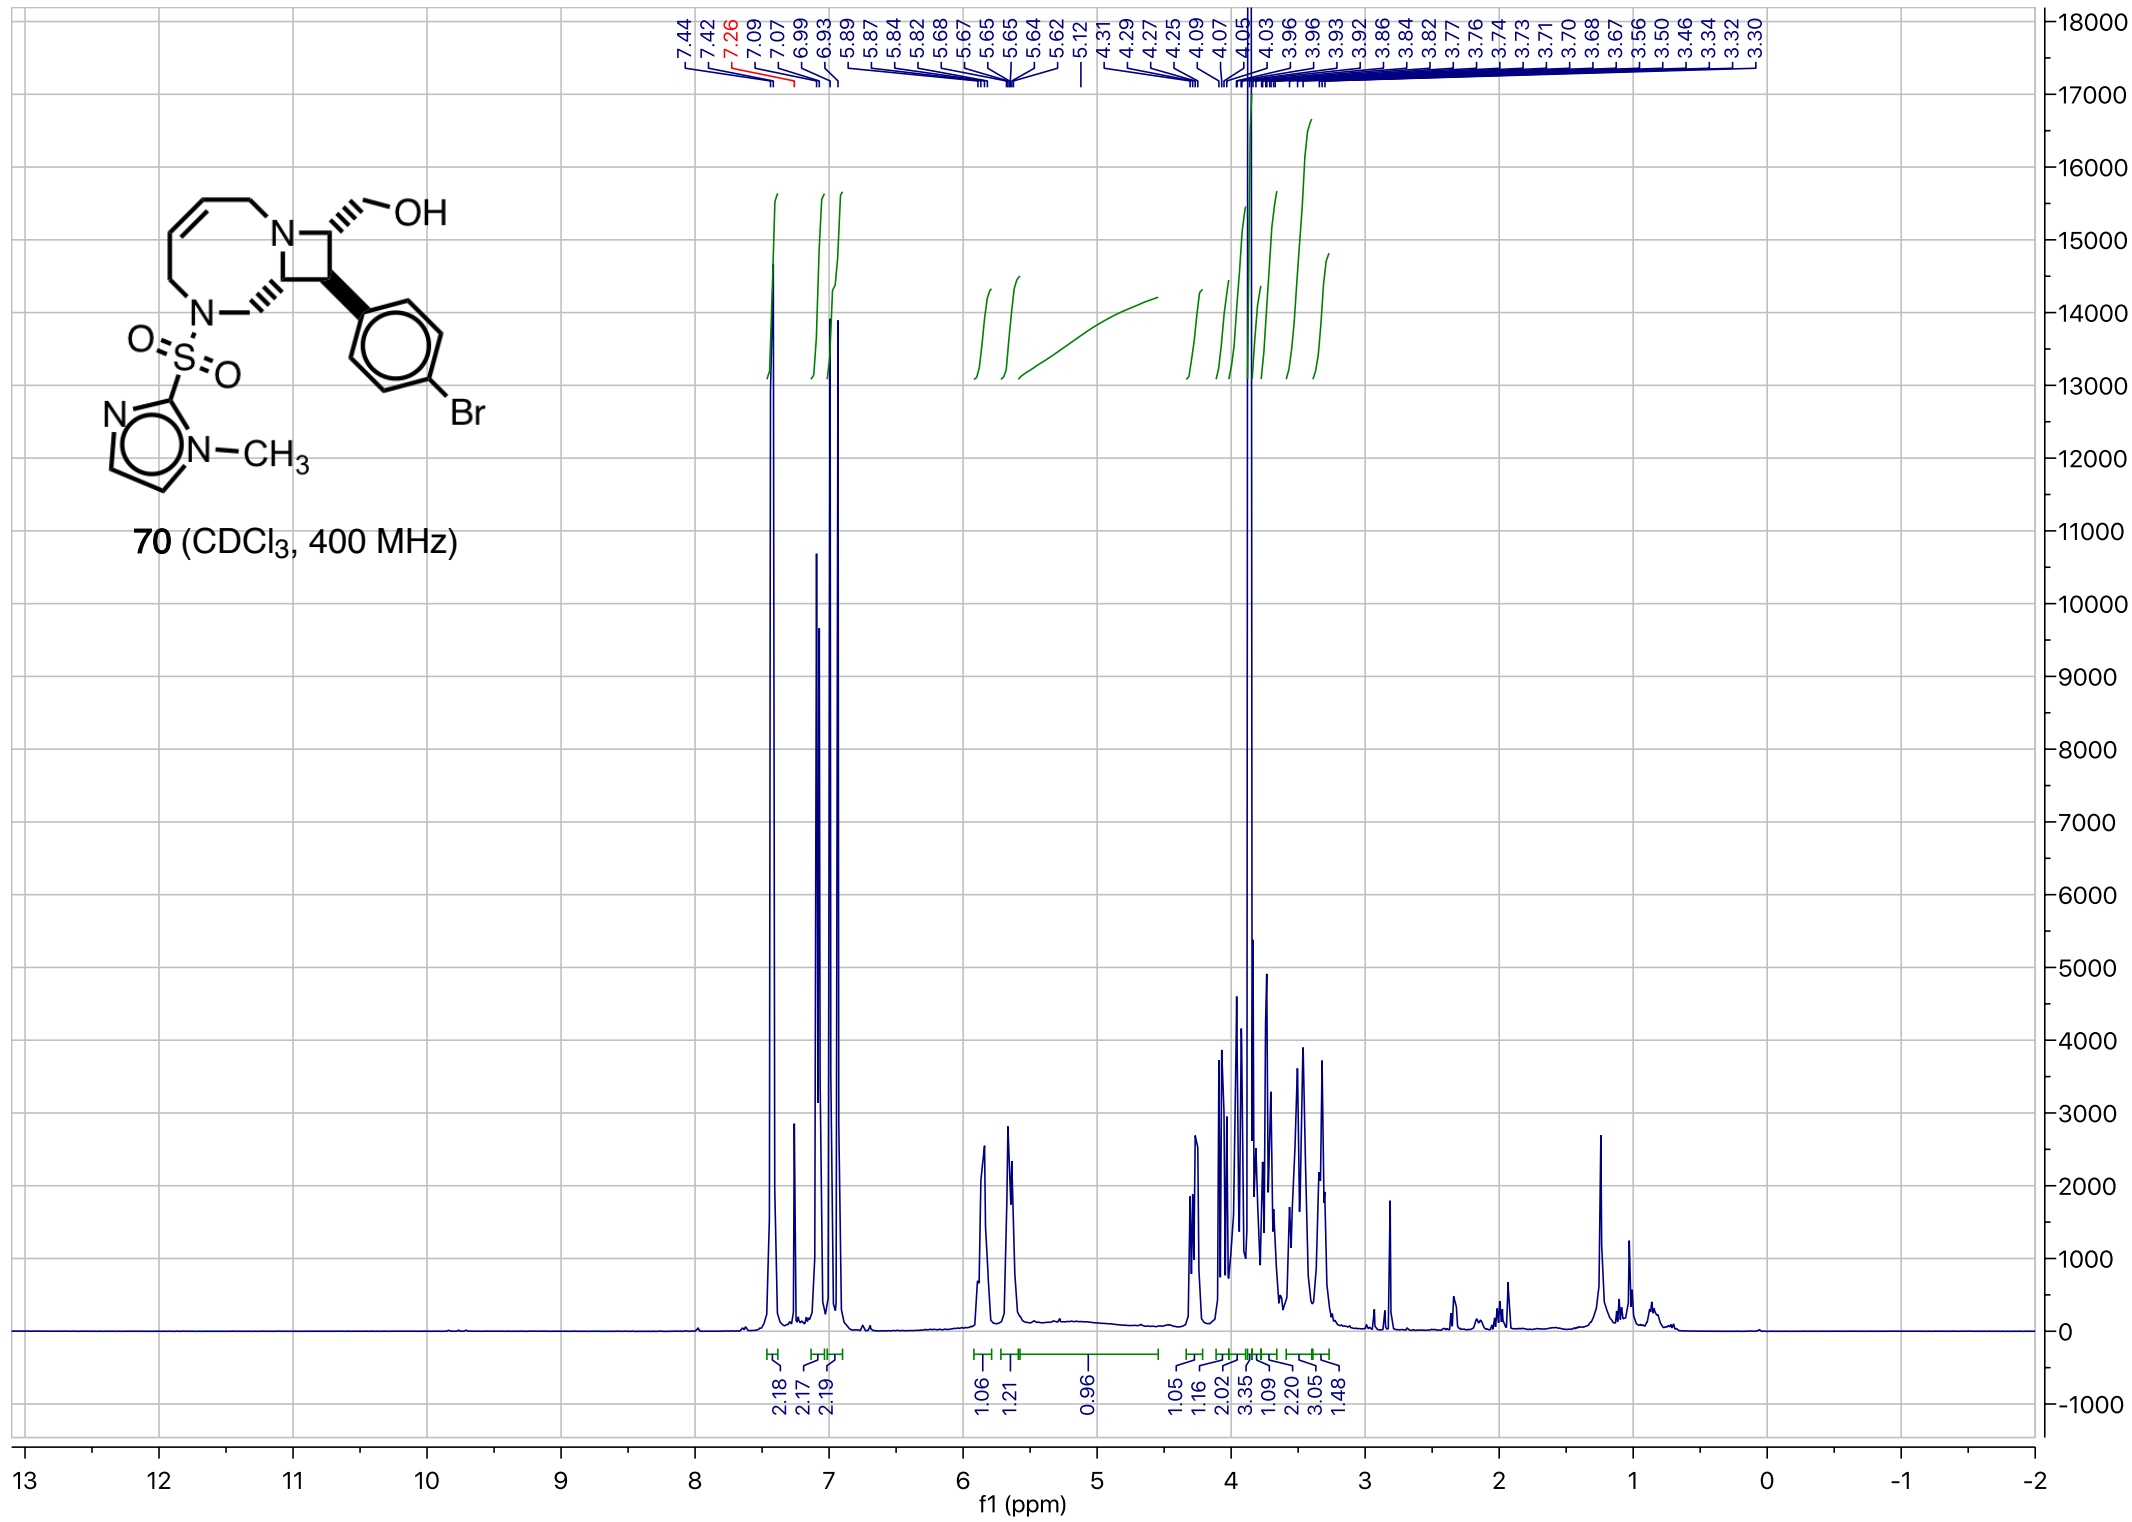

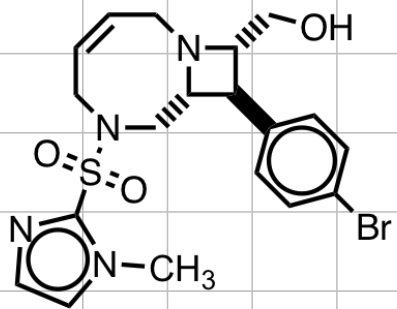

70 (CDCl<sub>3</sub>, 400 MHz)

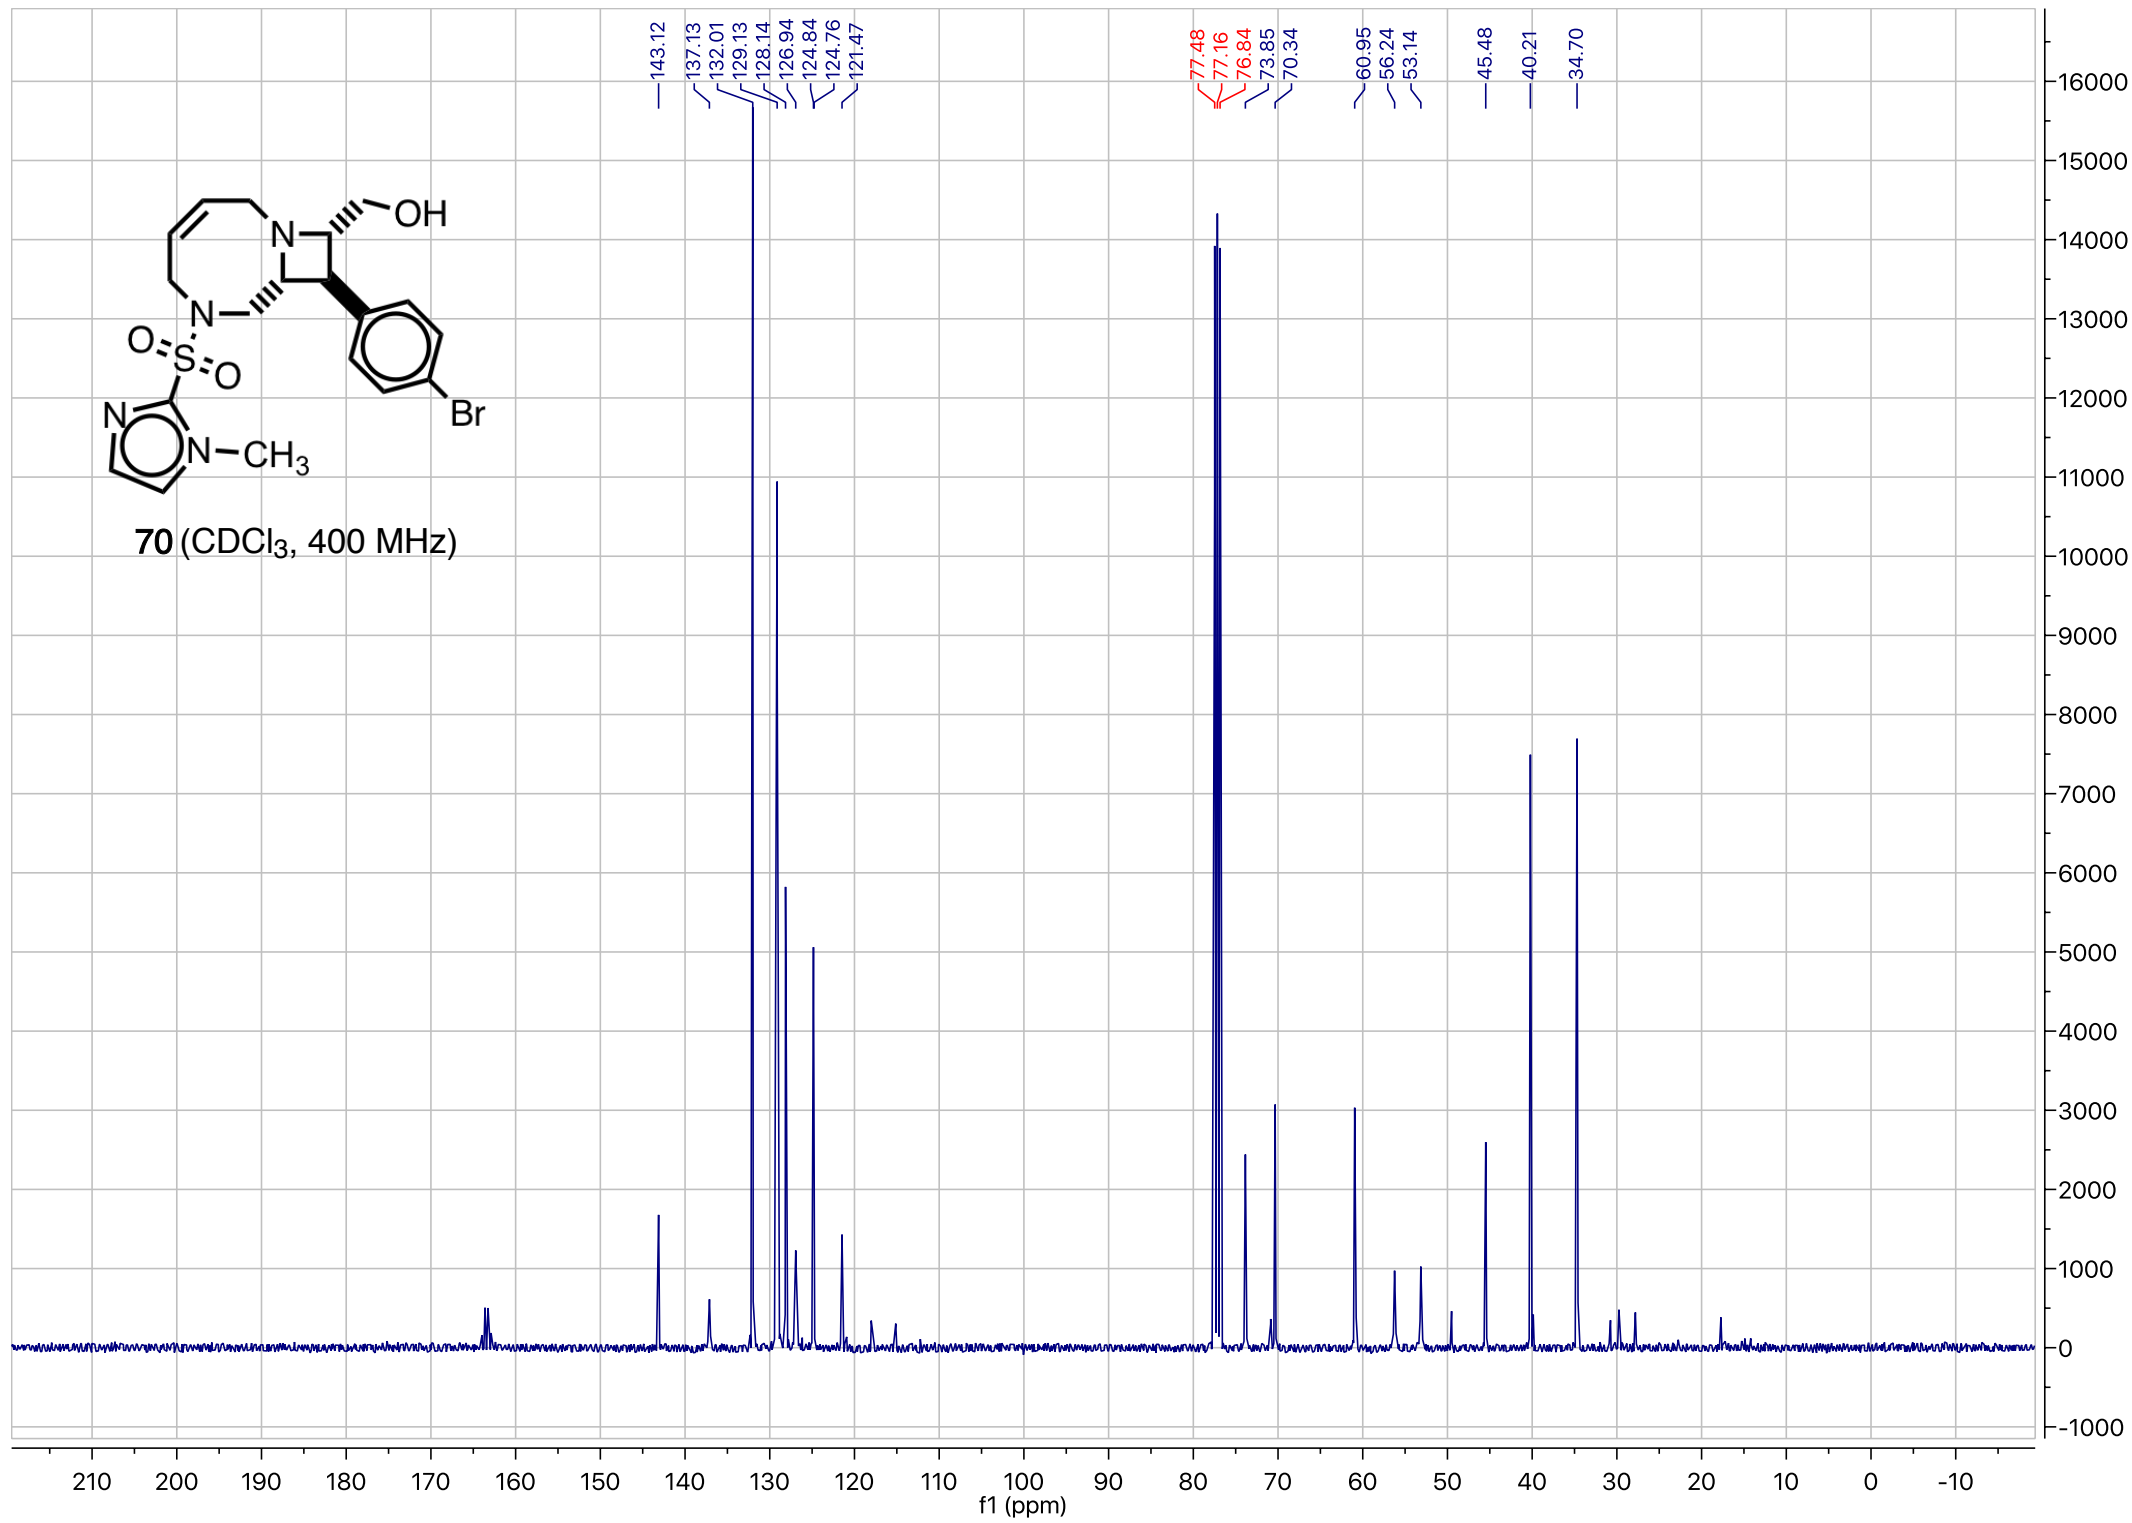

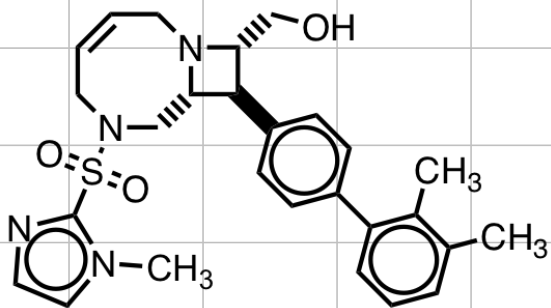

71 (DMSO-*d*<sub>6</sub>, 400 MHz)

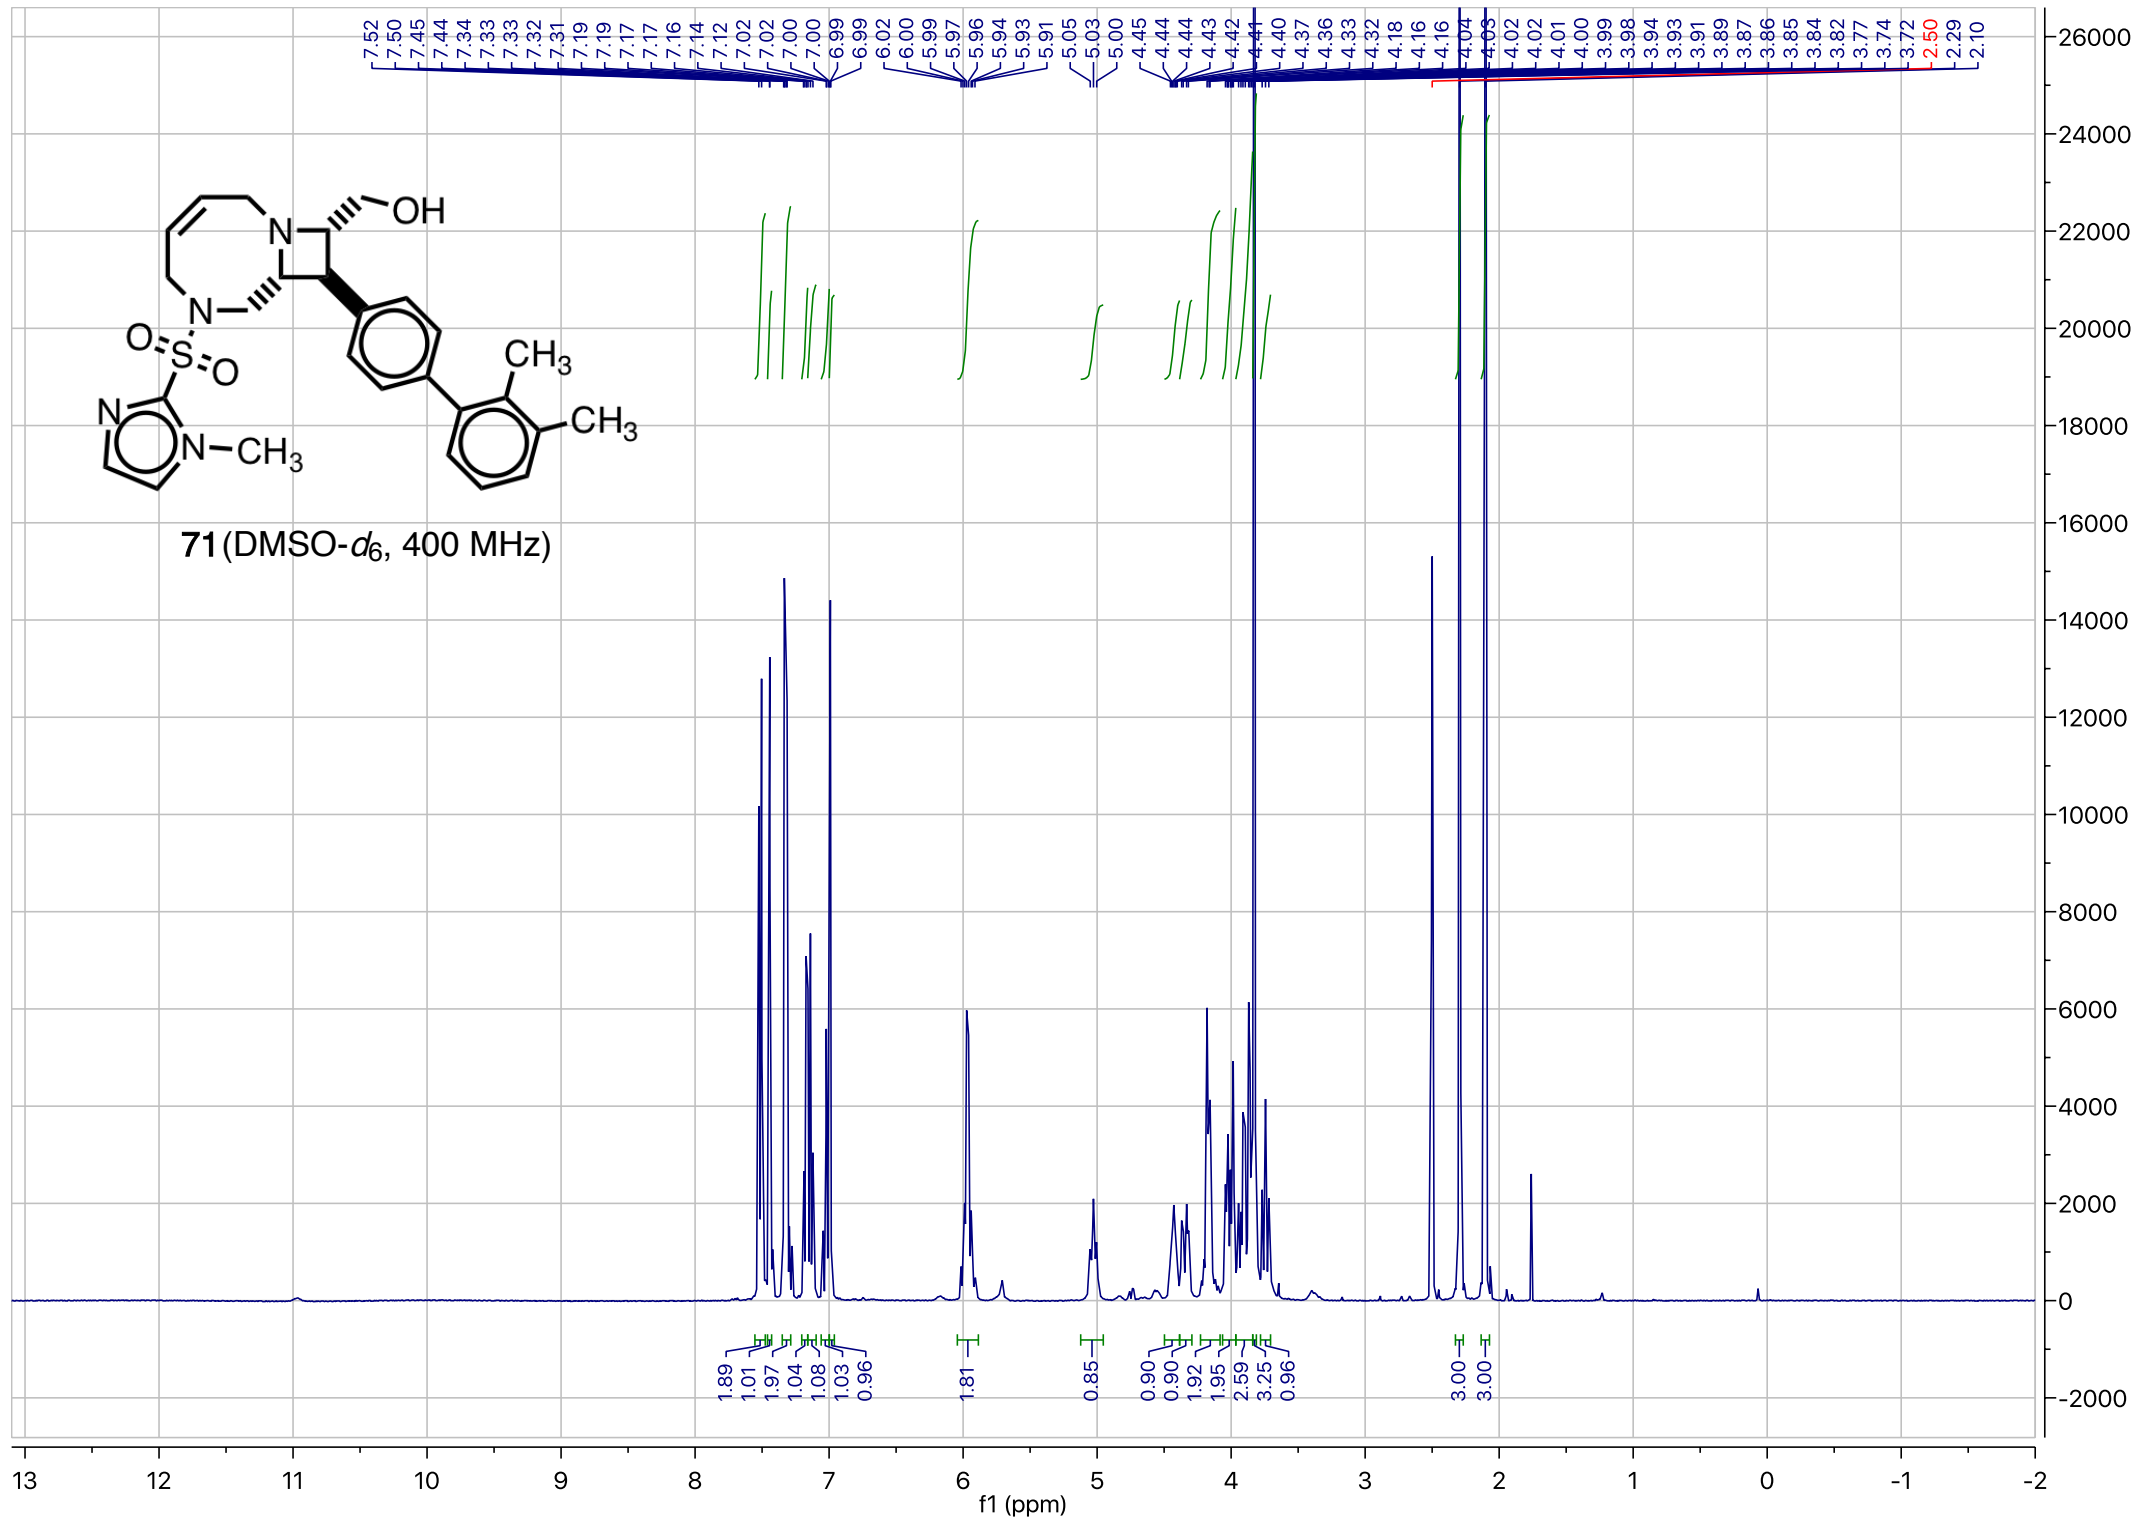

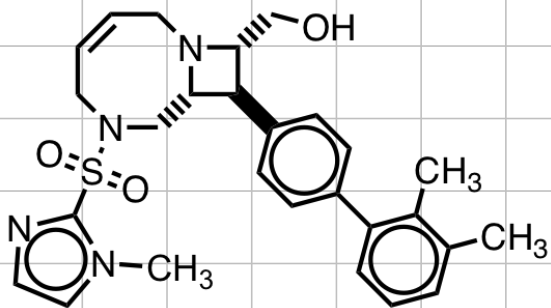

71 (DMSO-*d*<sub>6</sub>, 400 MHz)

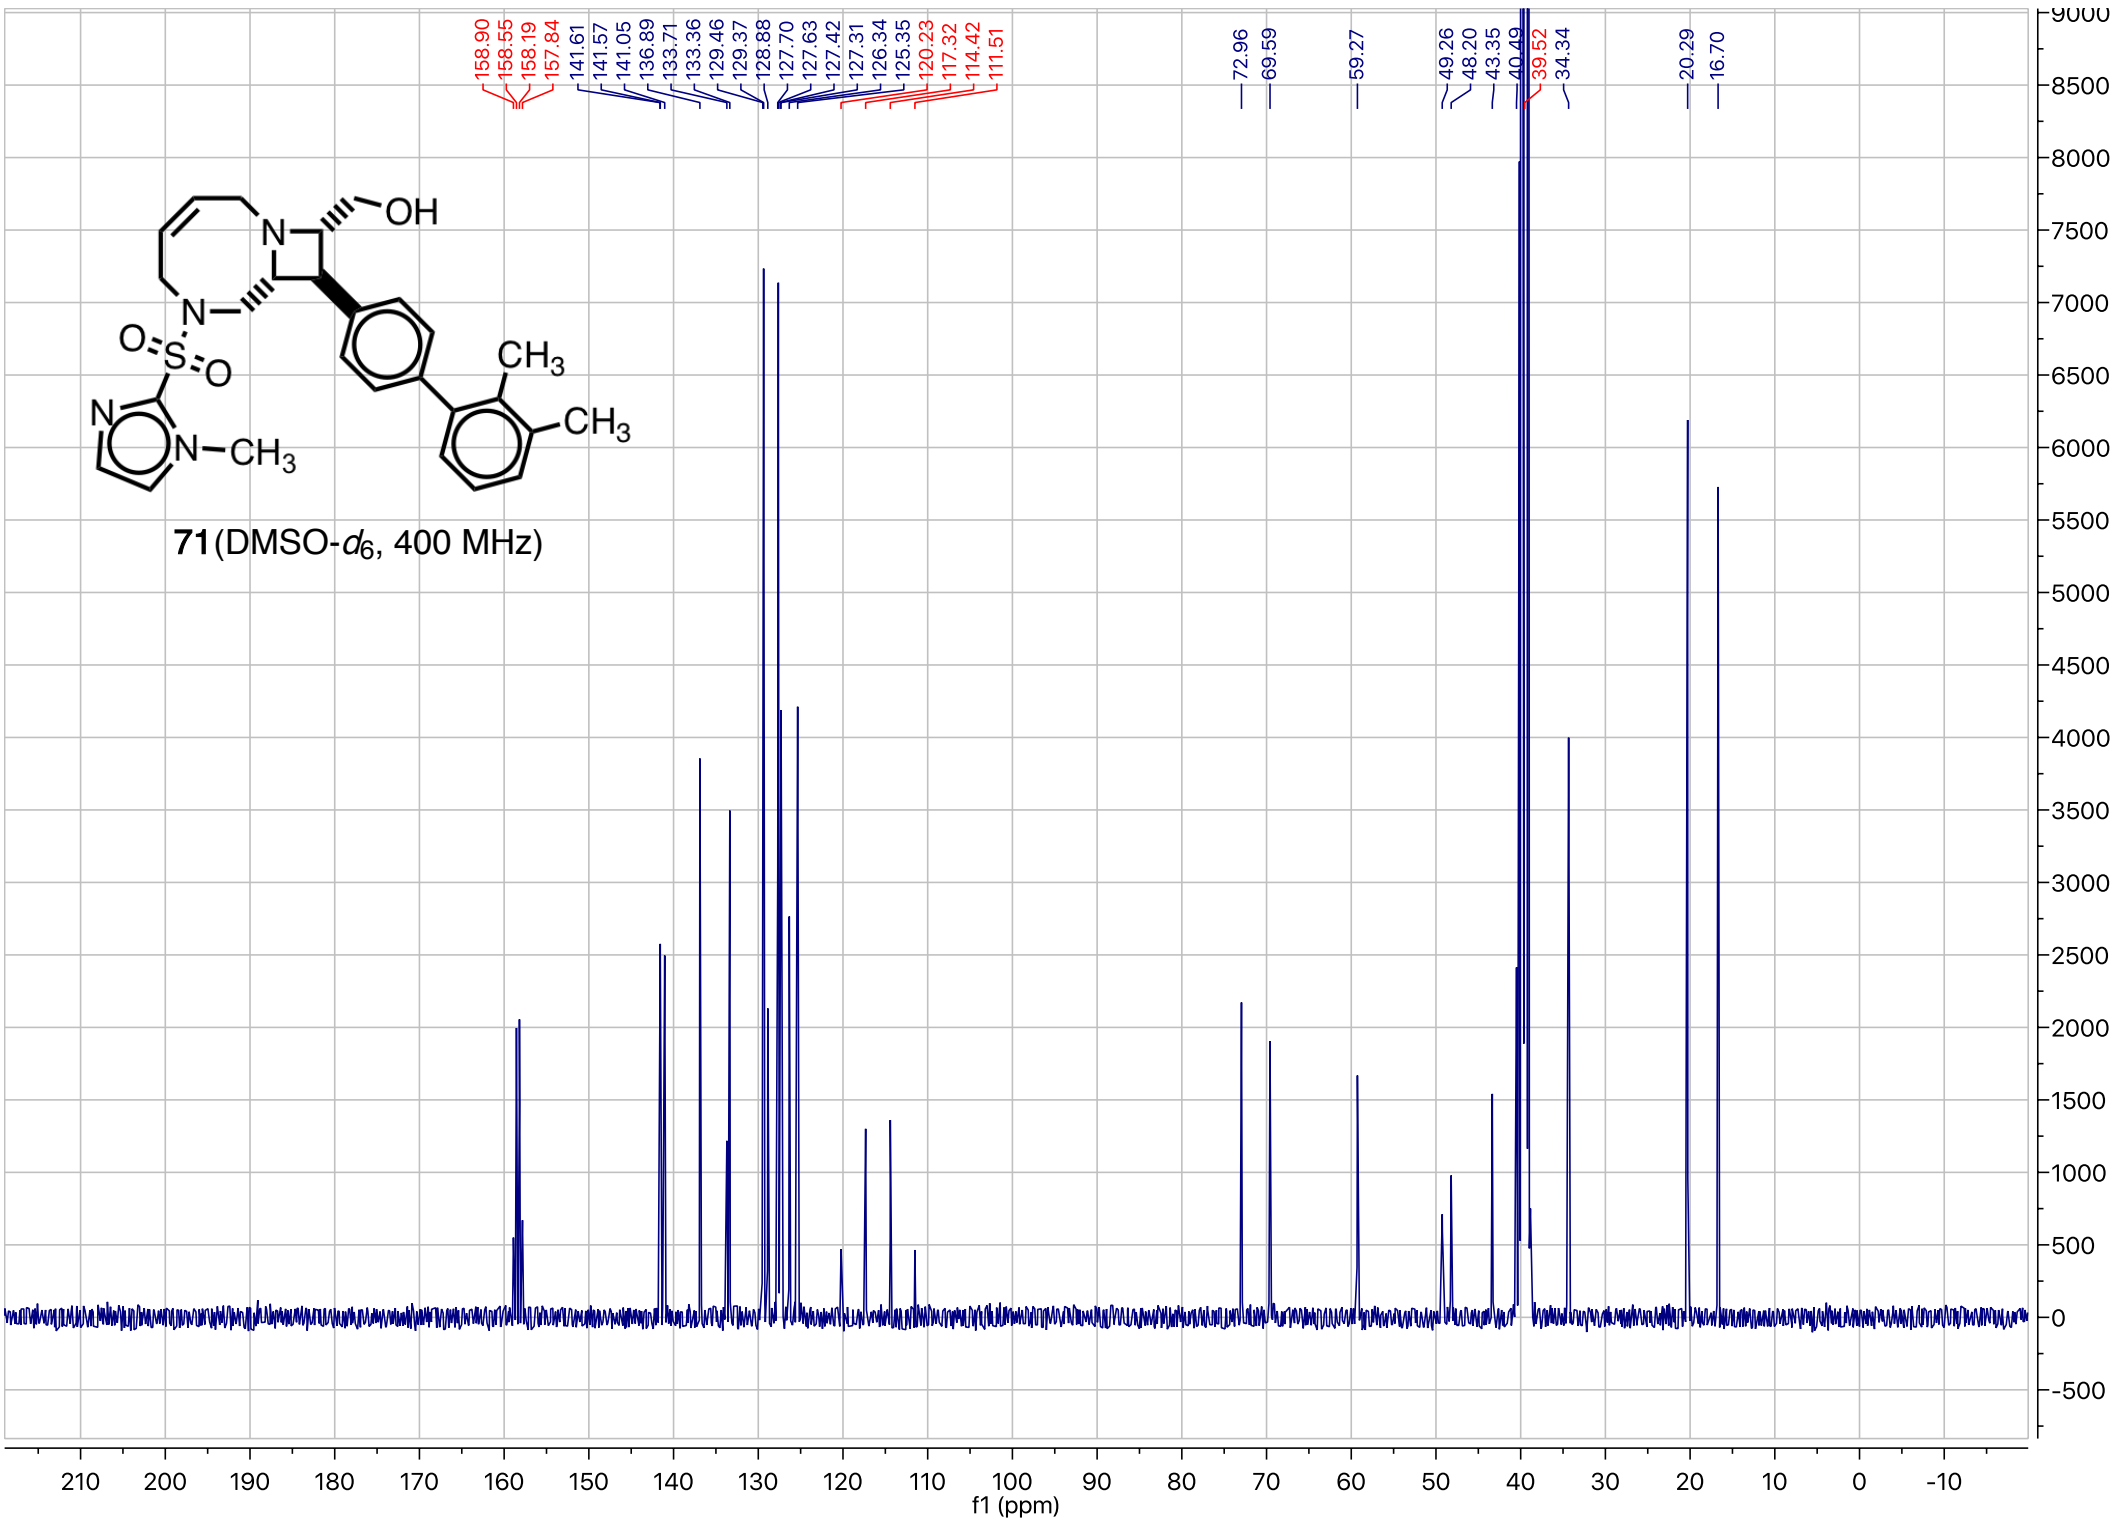

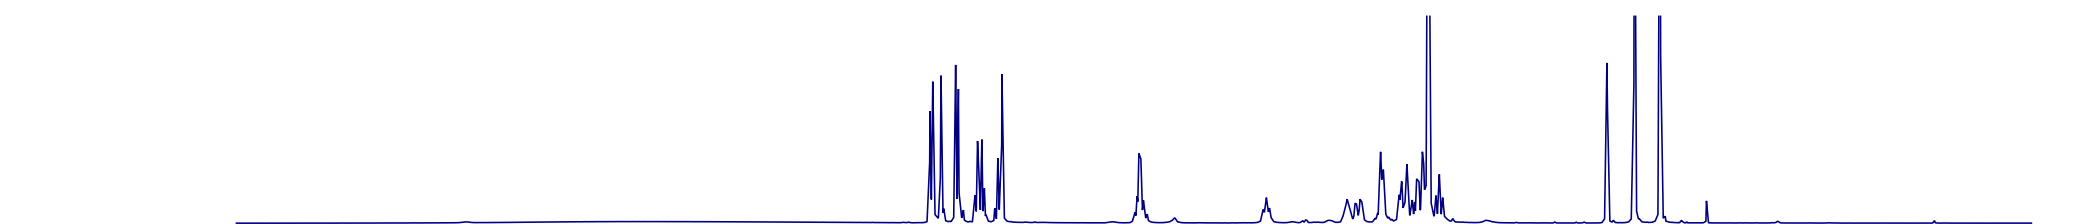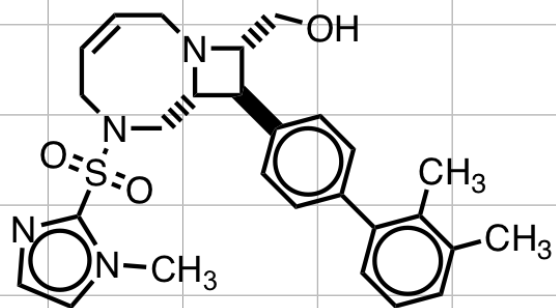

71(DMSO-*d*<sub>6</sub>, 400 MHz)

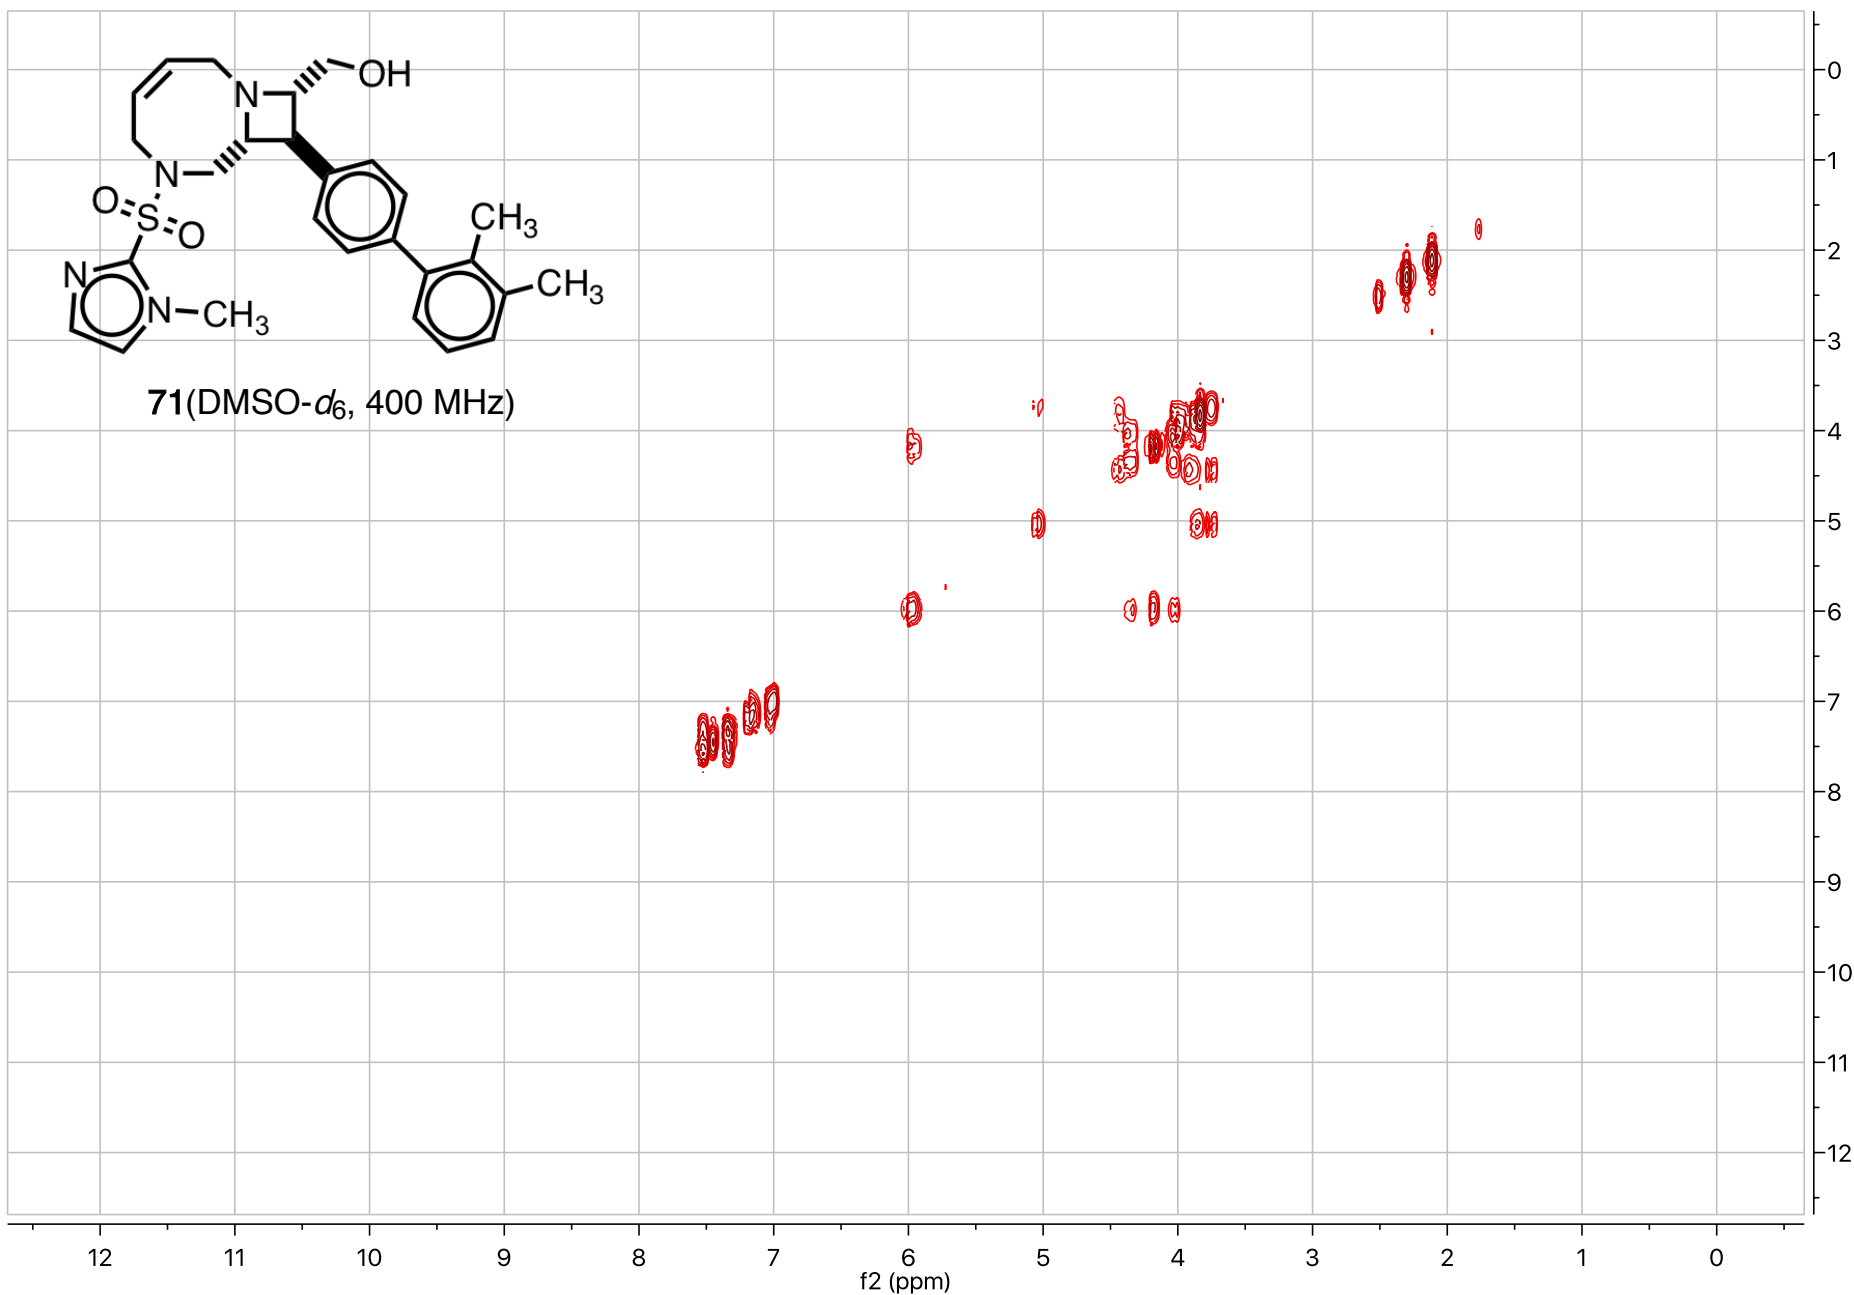

f1 (ppm)

f2 (ppm)

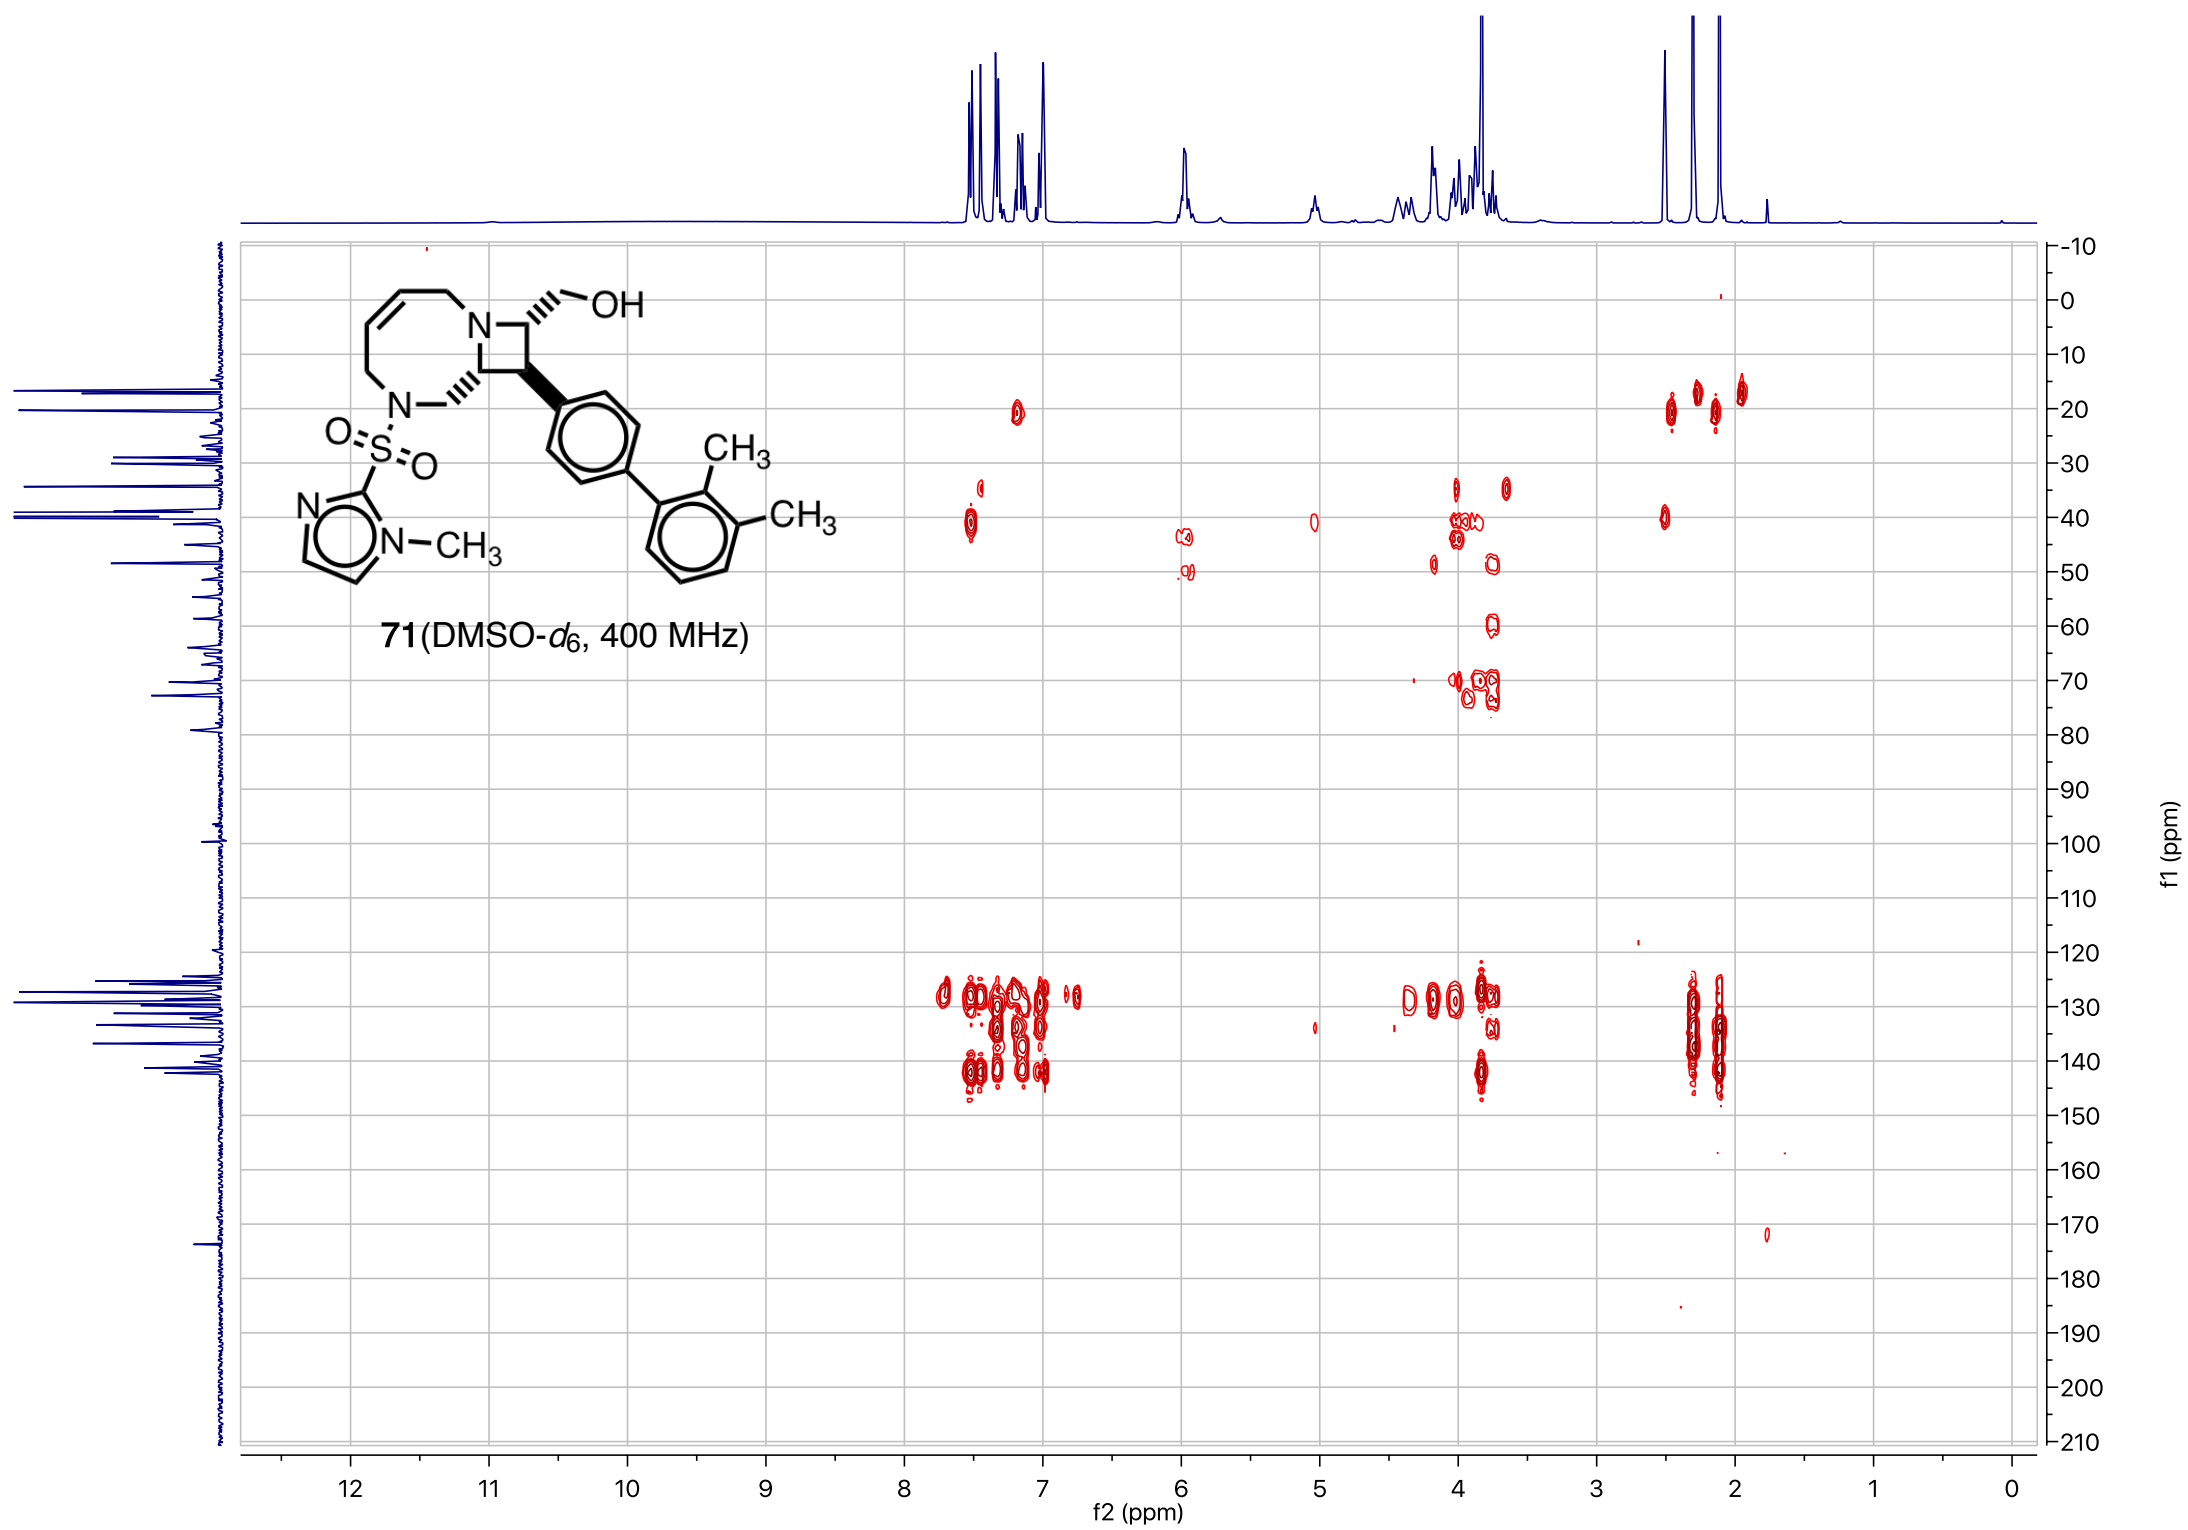



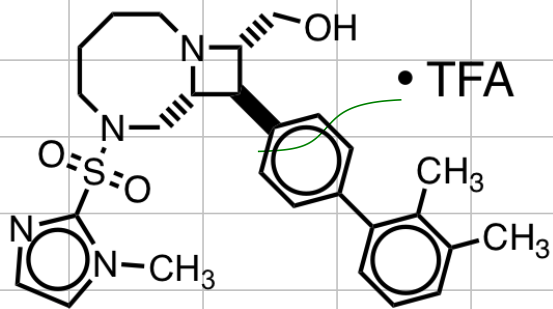

63 (DMSO- $d_6$ , 400 MHz)

• TFA

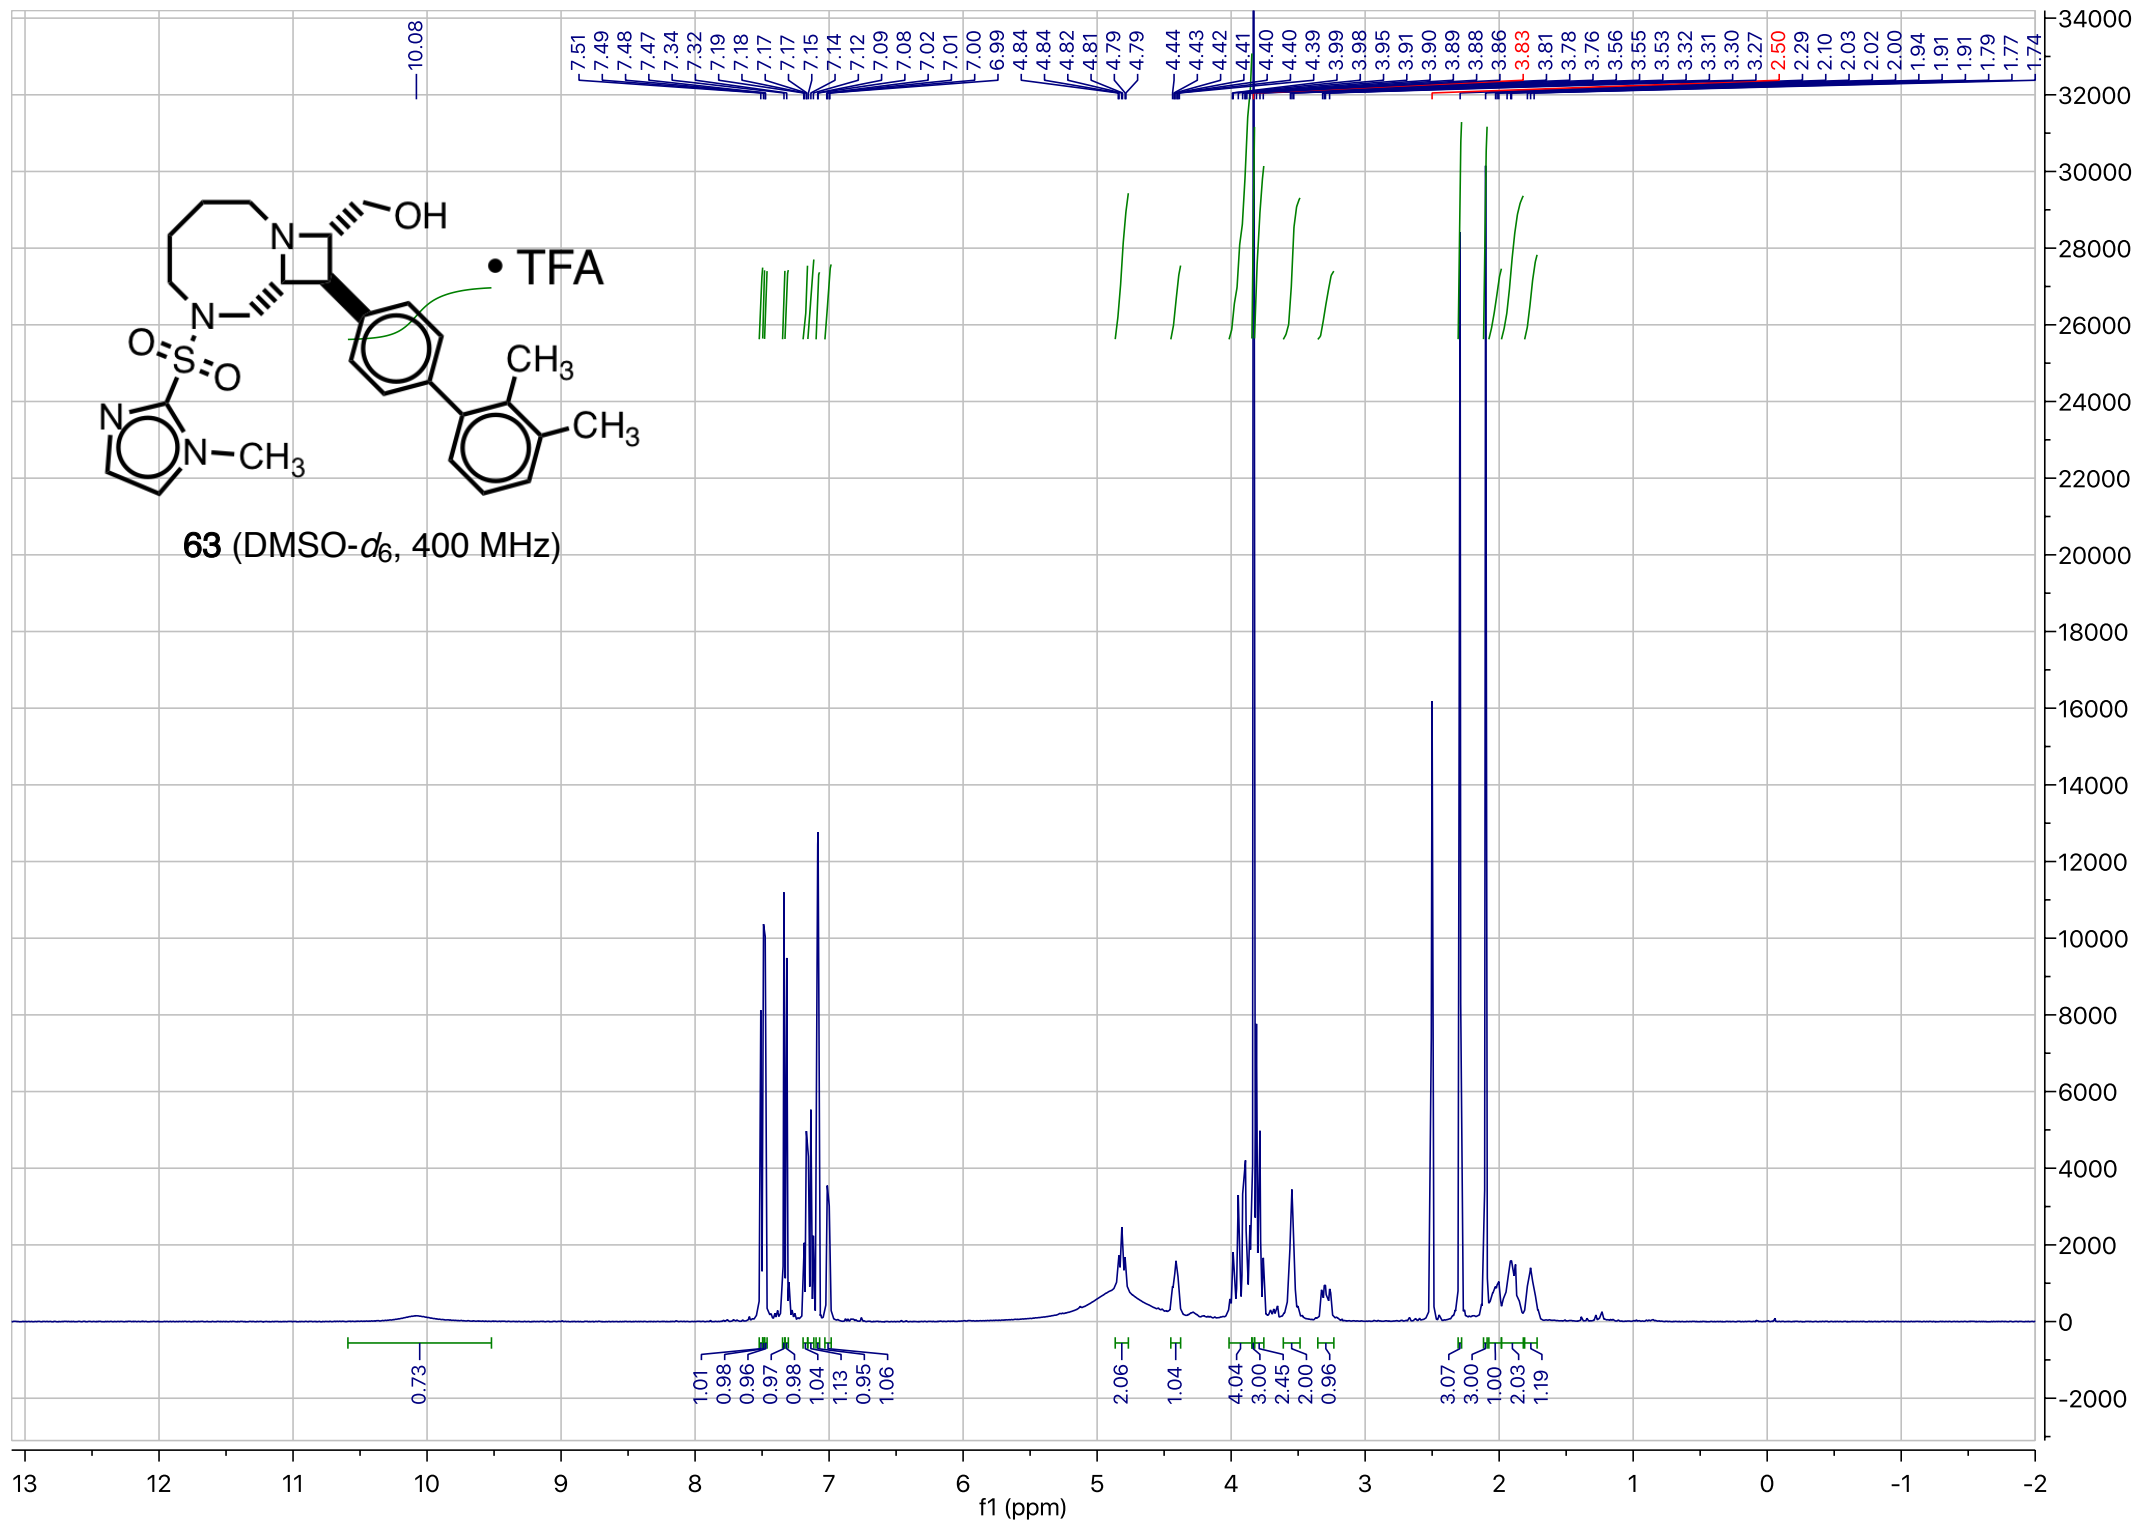

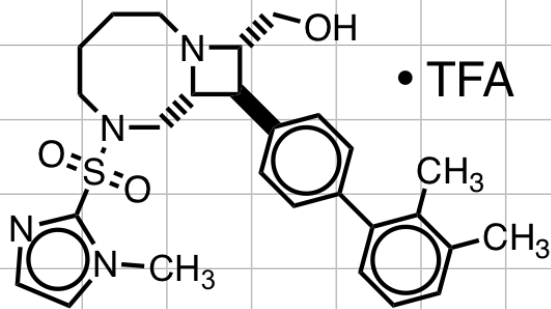

63 (DMSO-*d*<sub>6</sub>, 400 MHz)

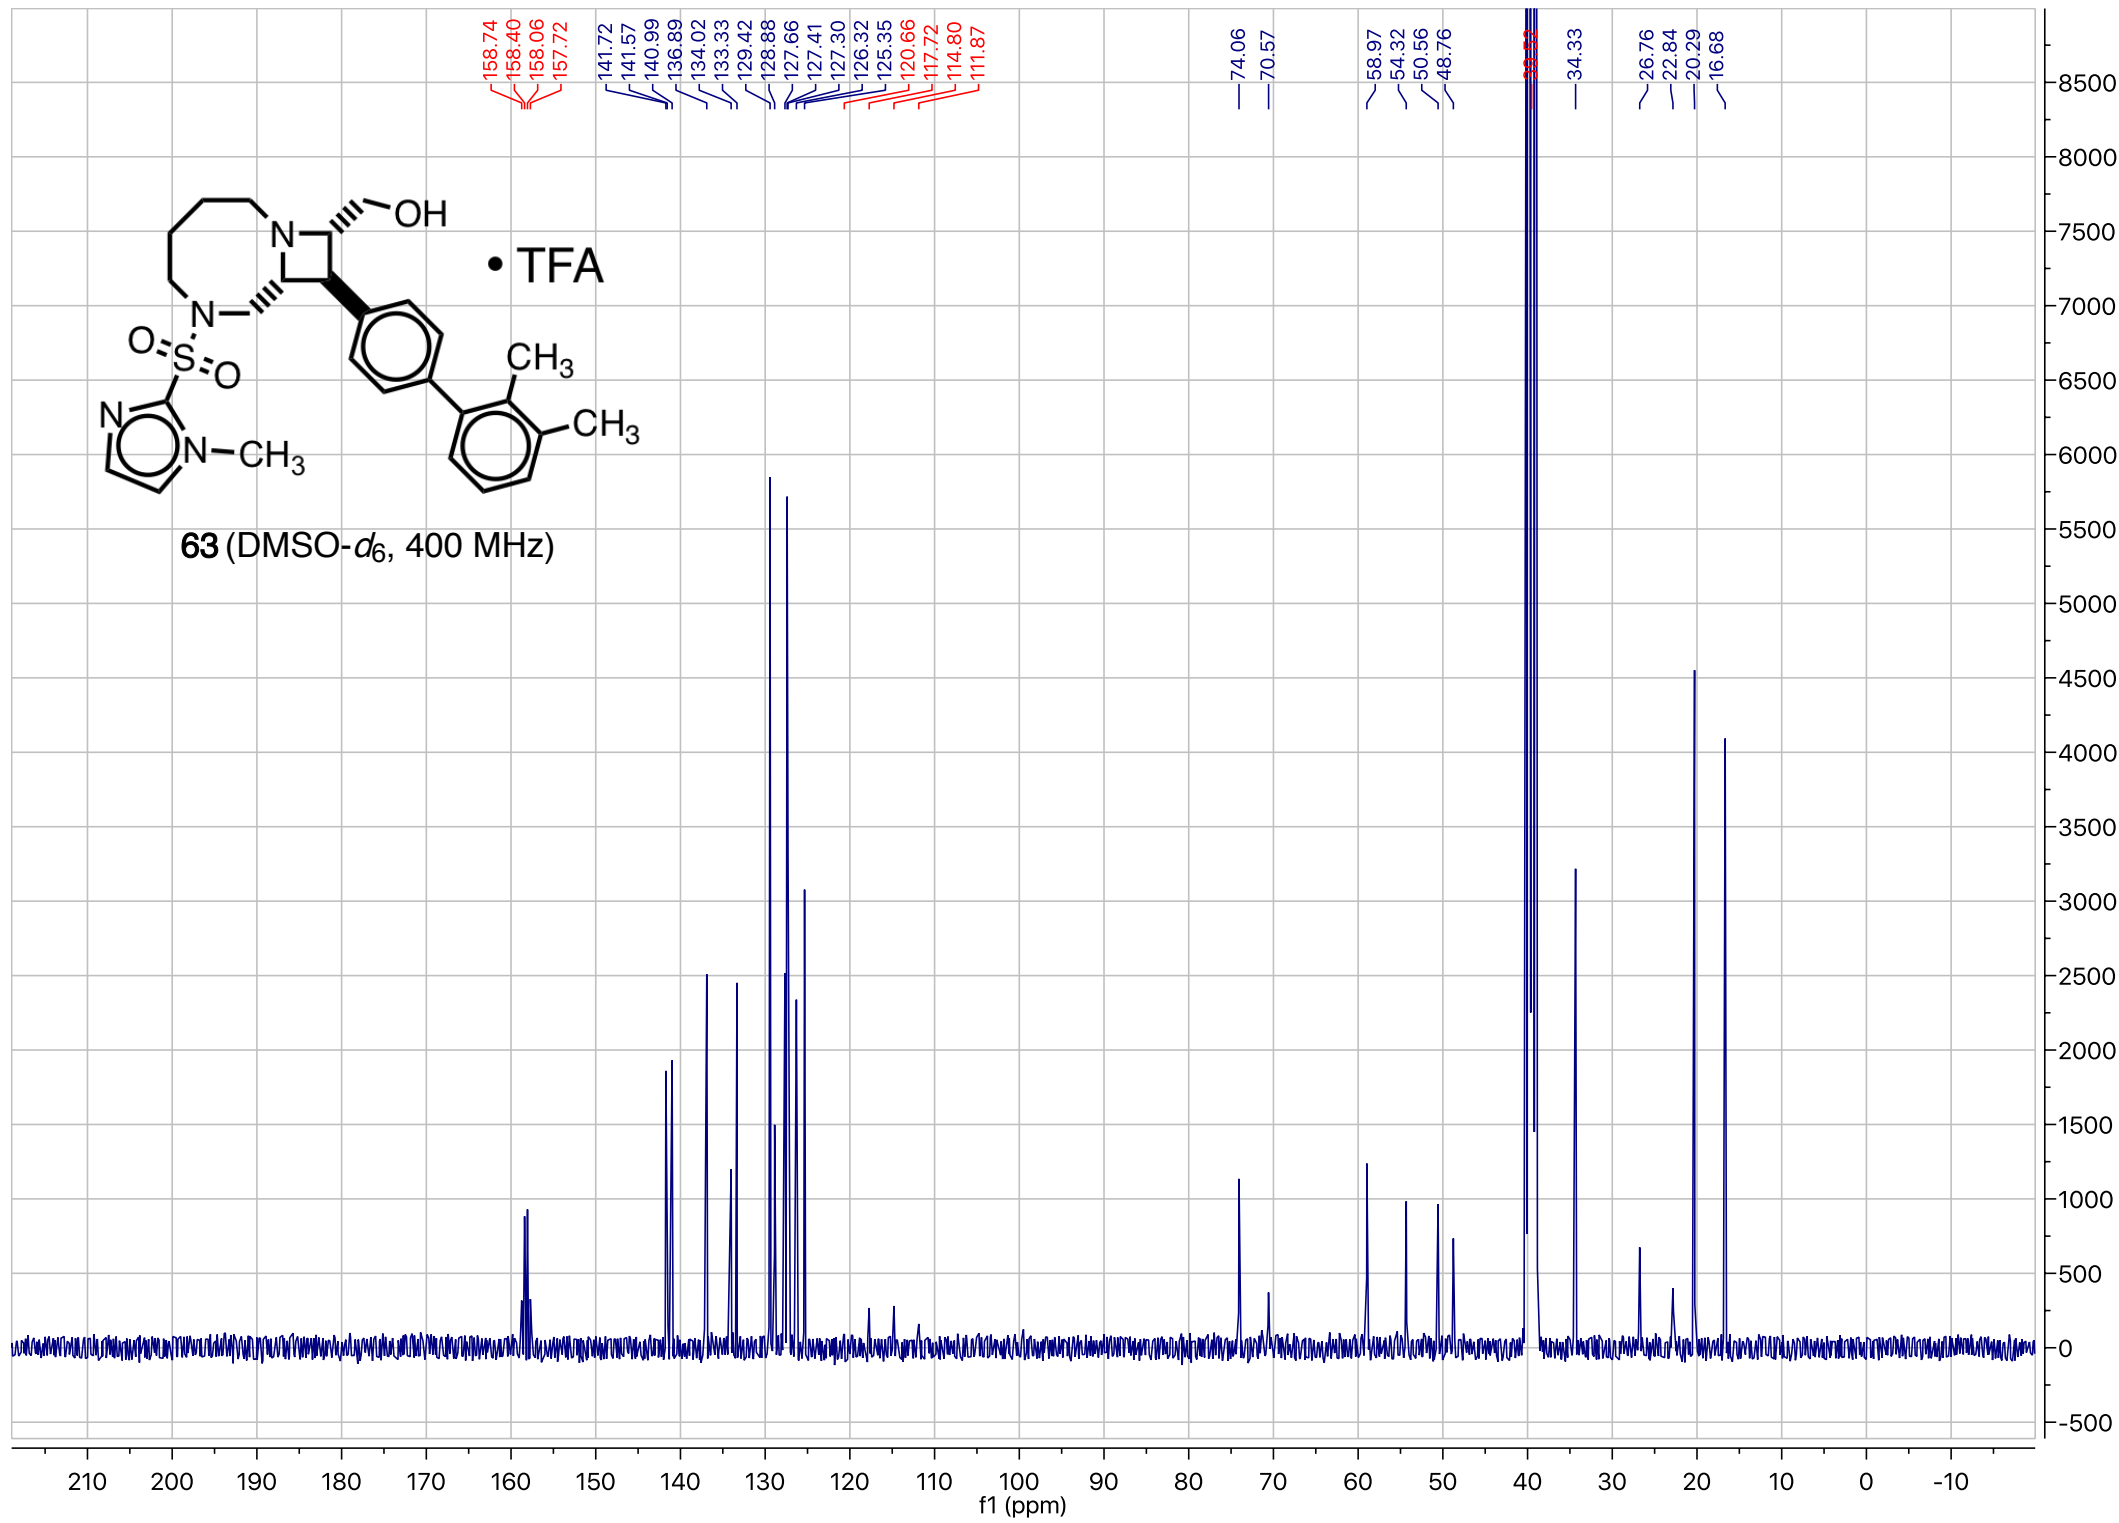

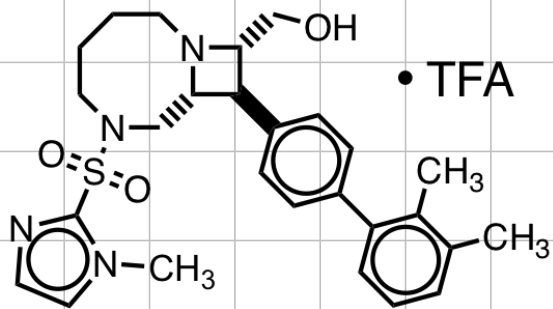

63 (DMSO-*d*<sub>6</sub>, 400 MHz)

-76.20

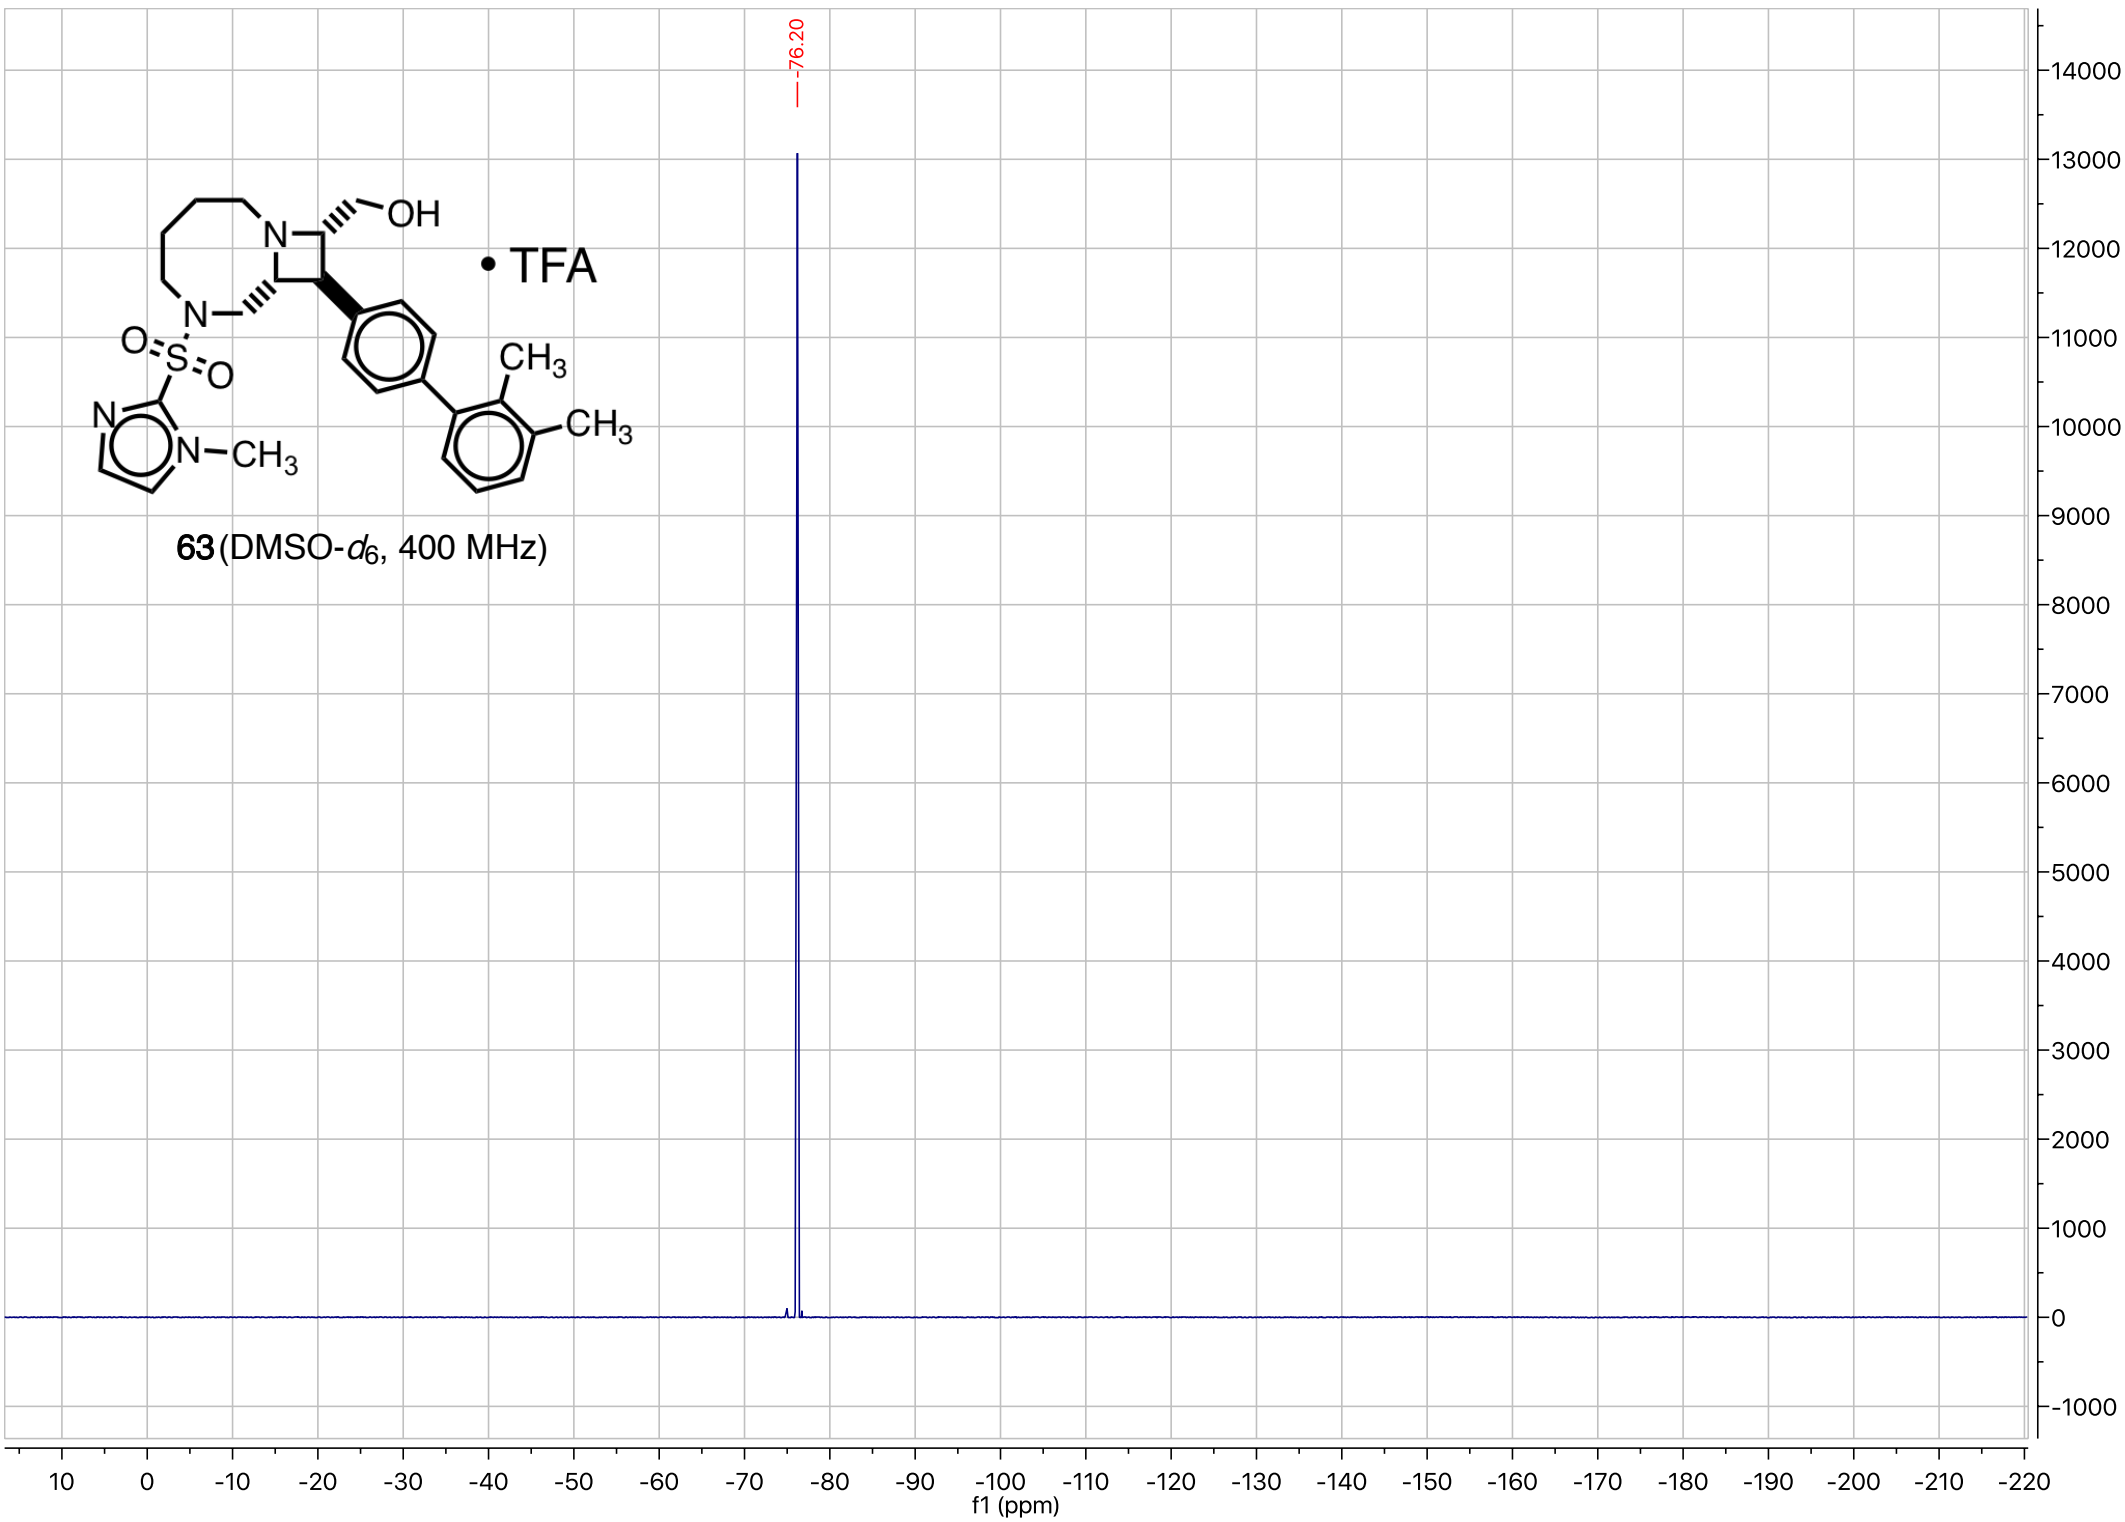

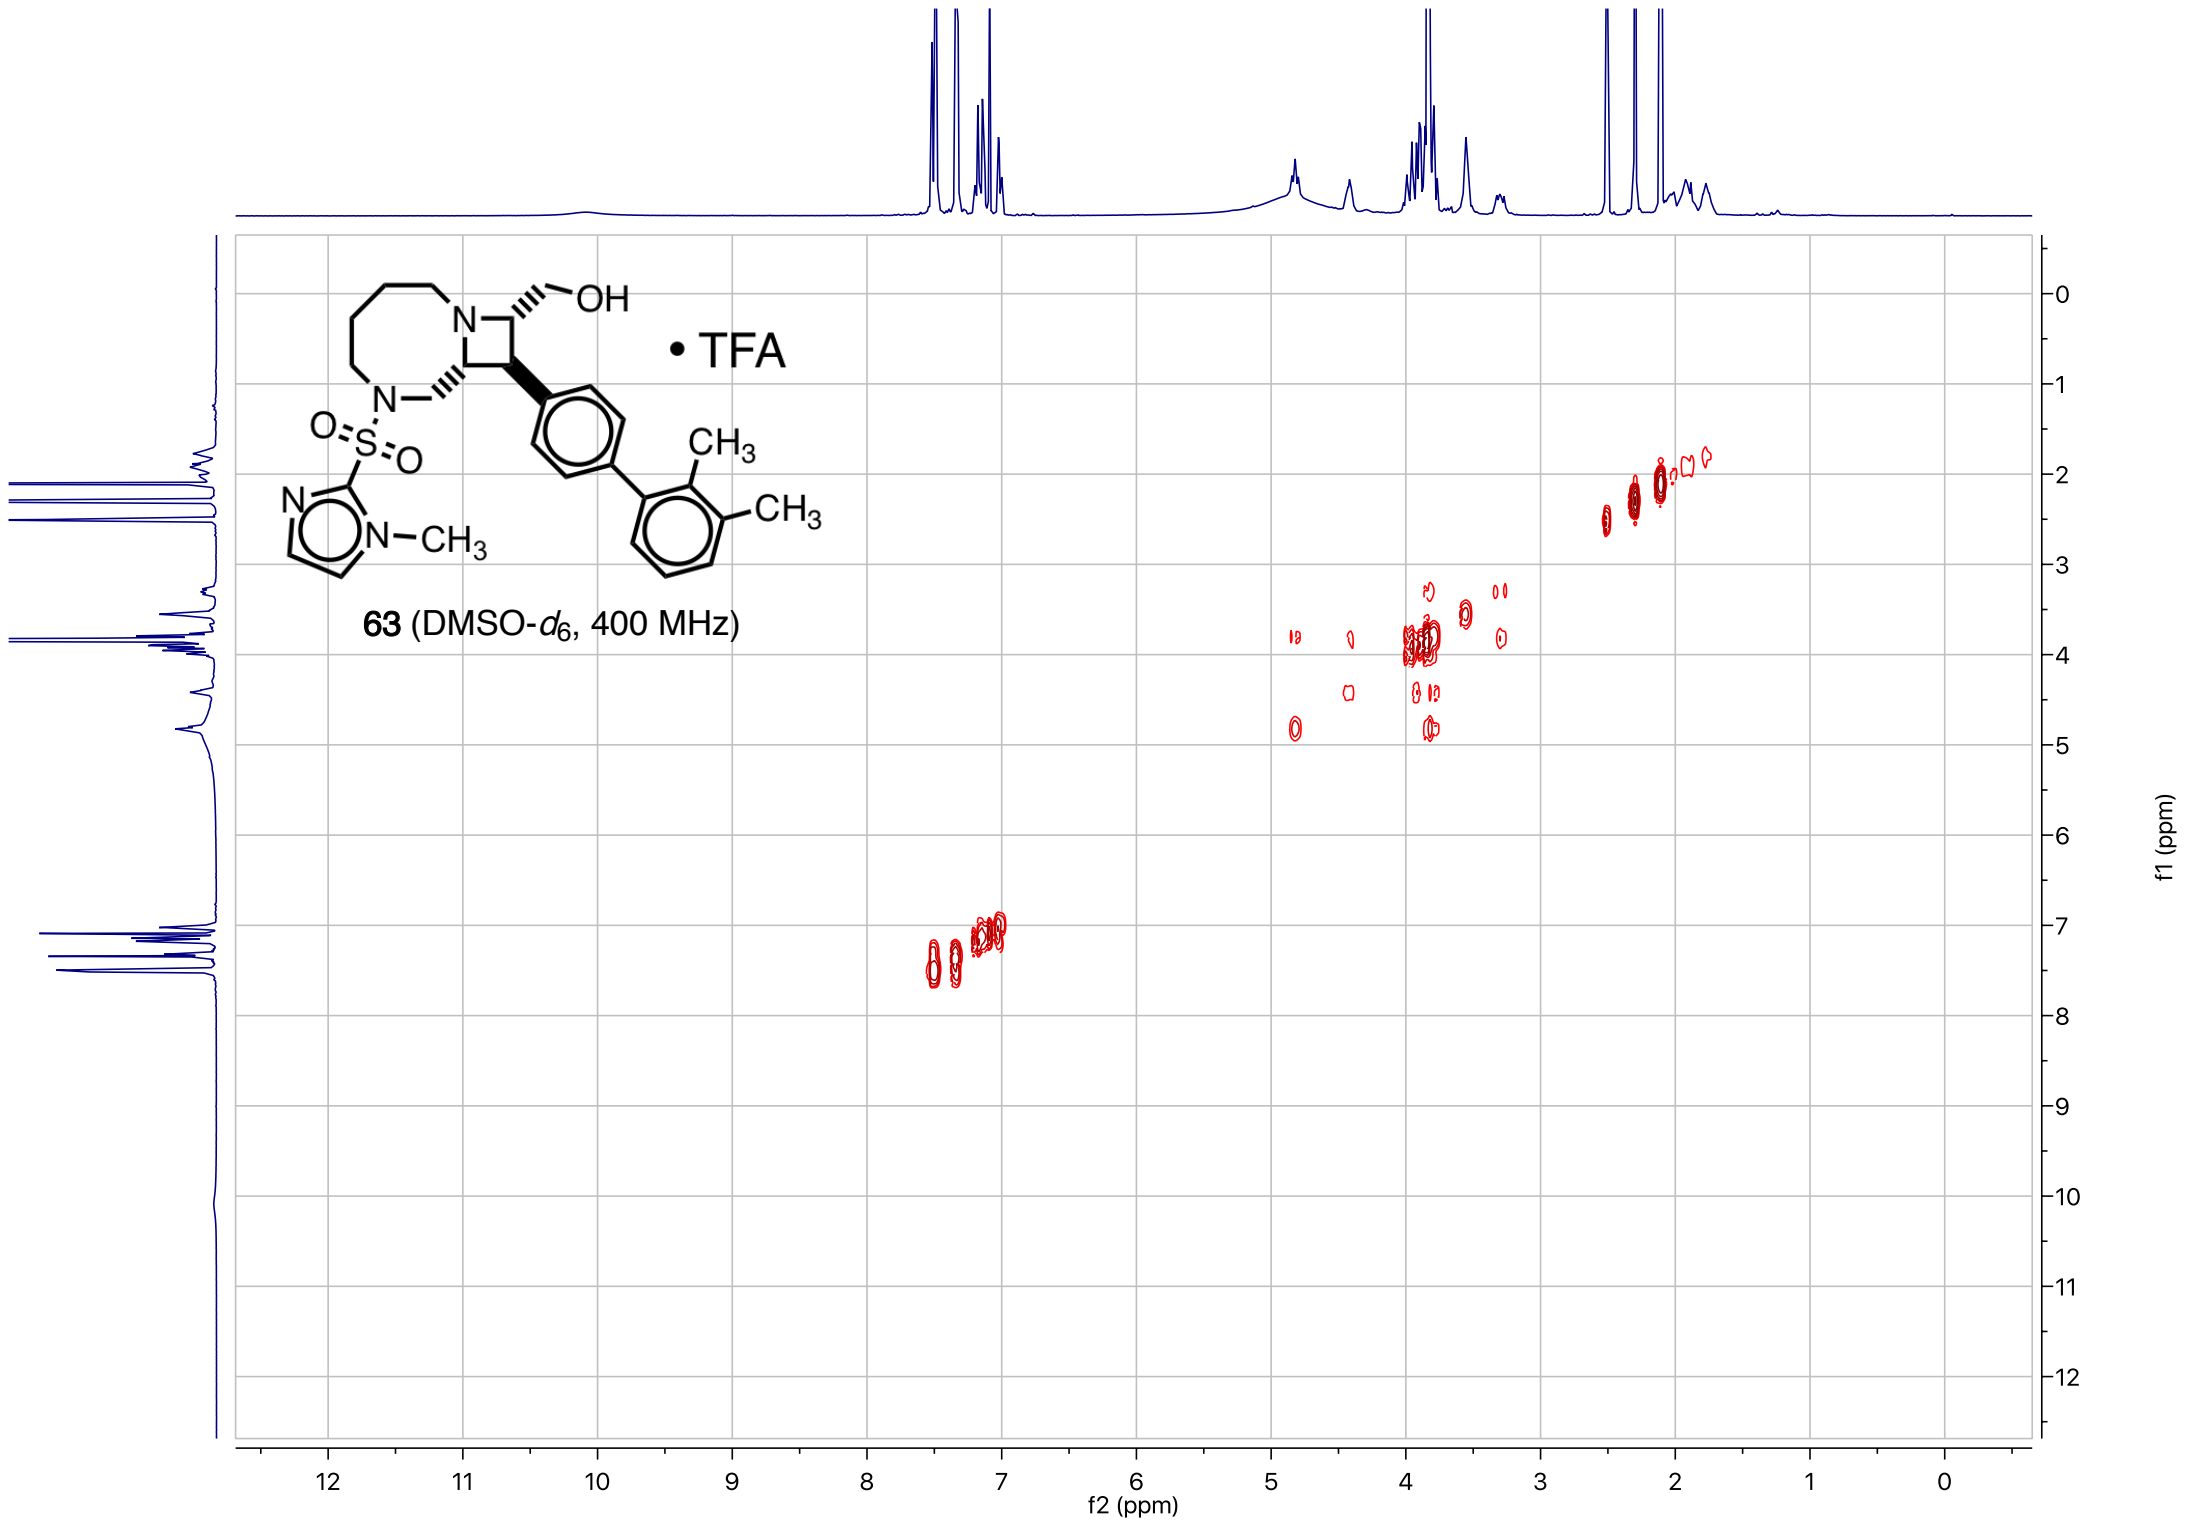

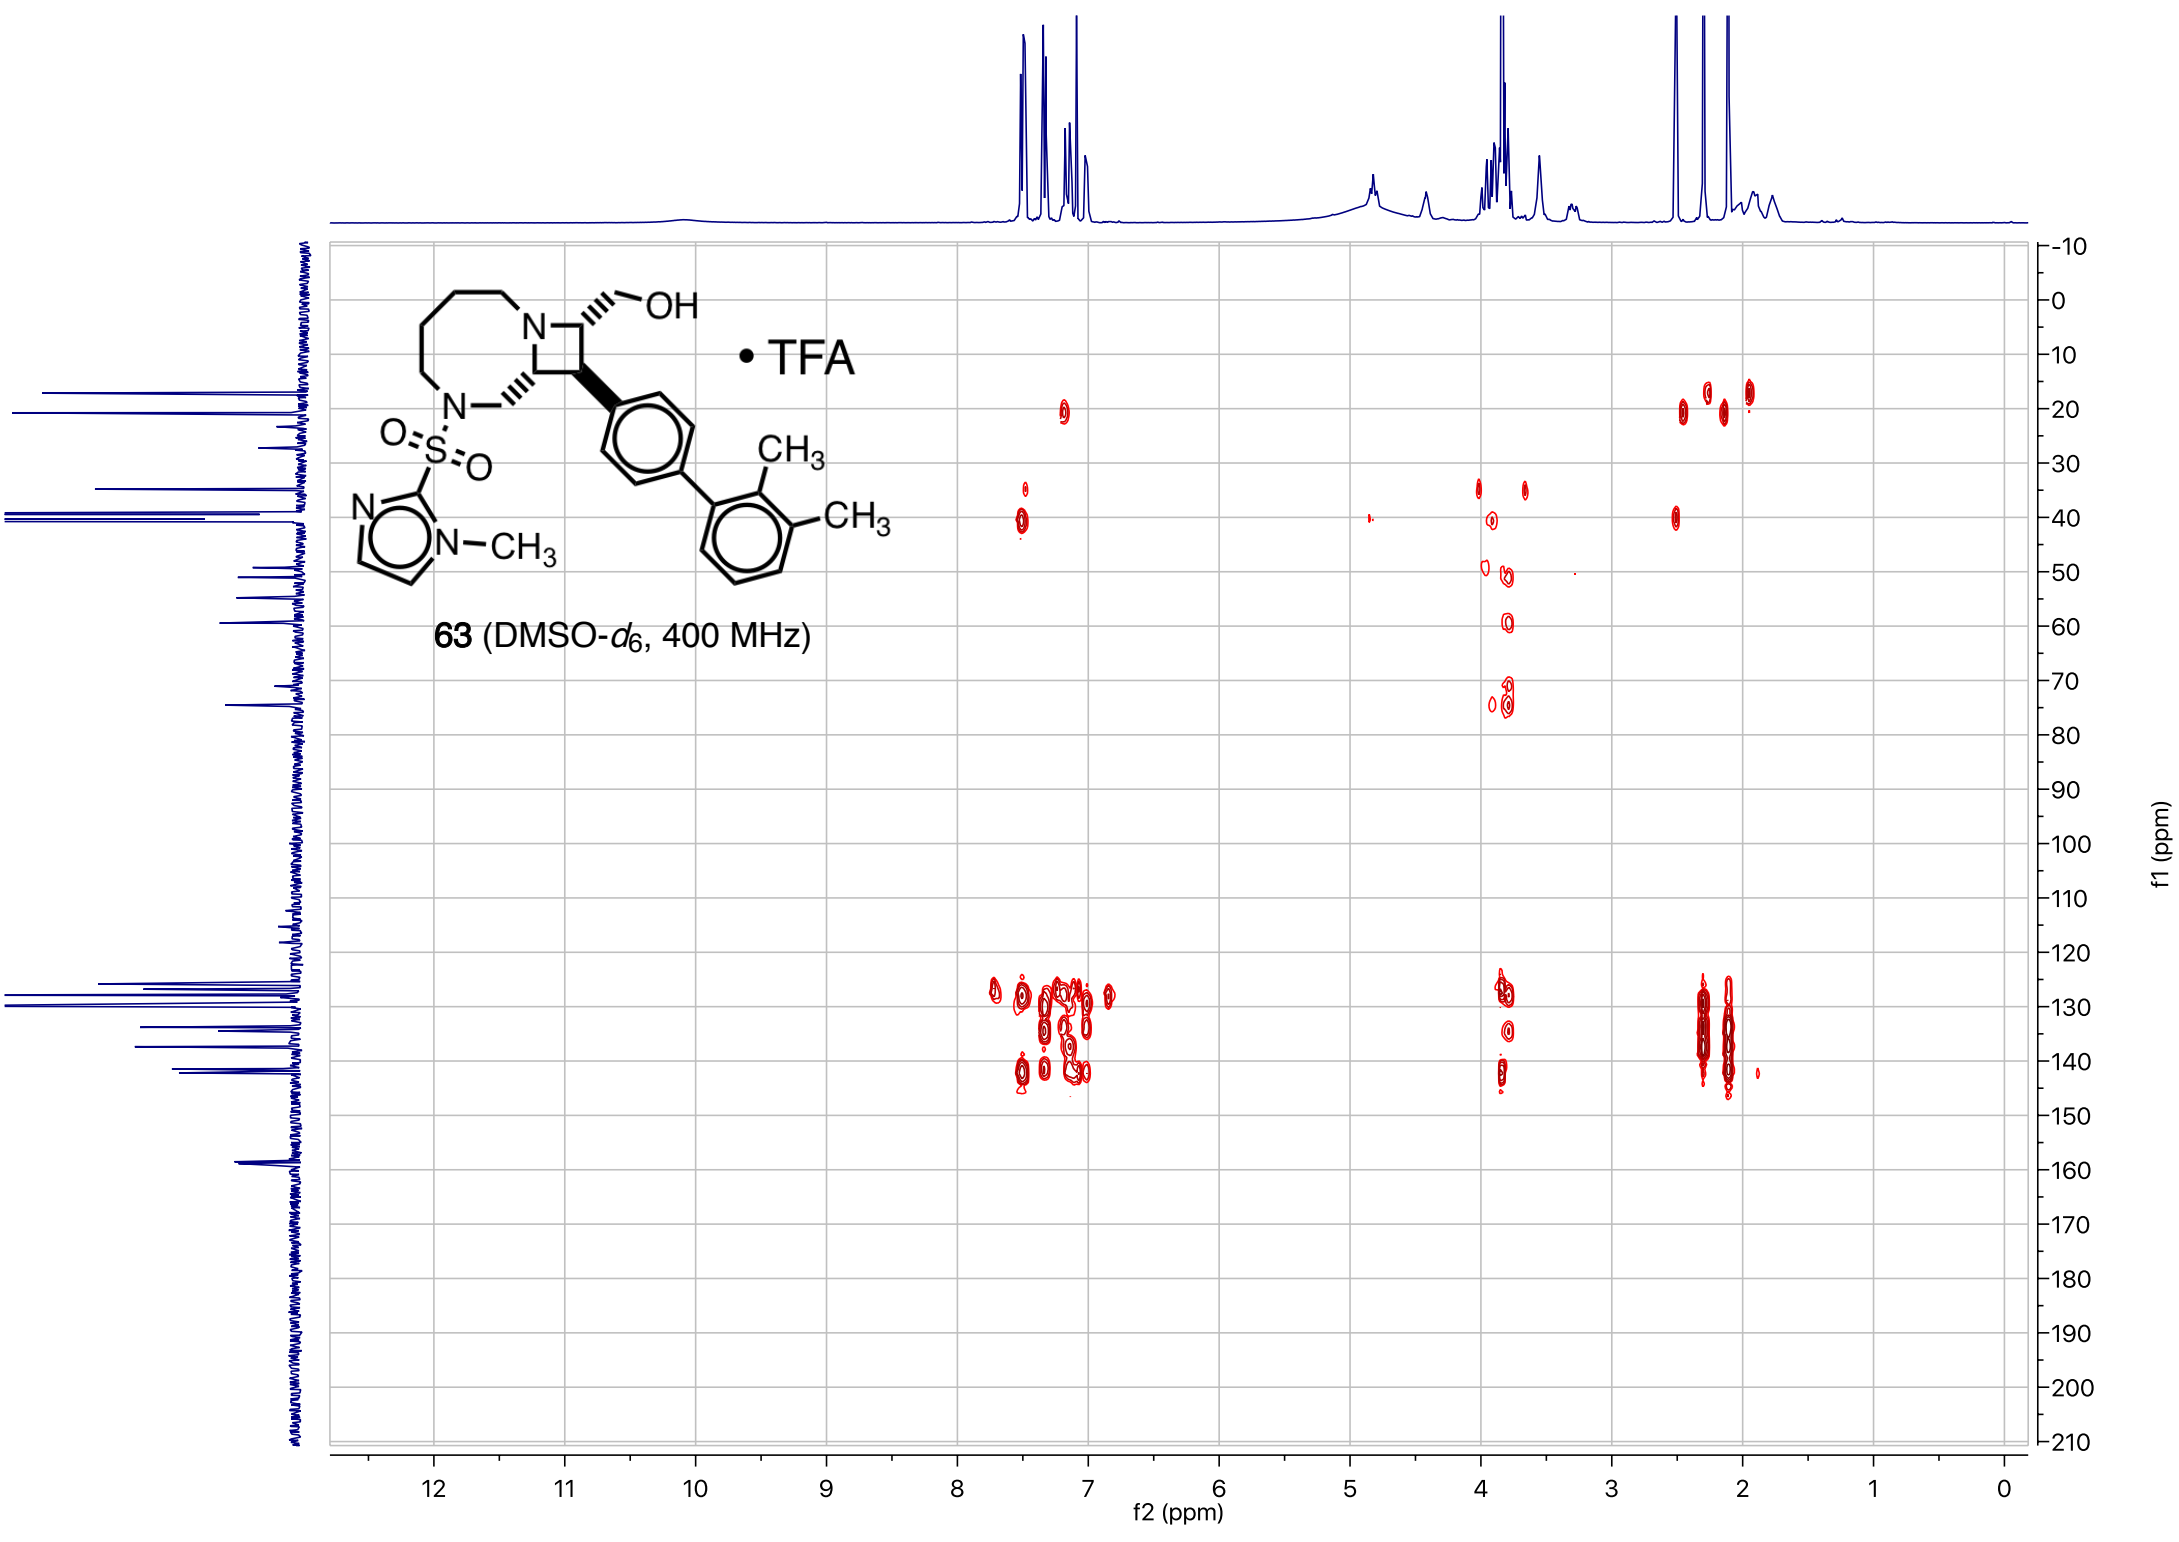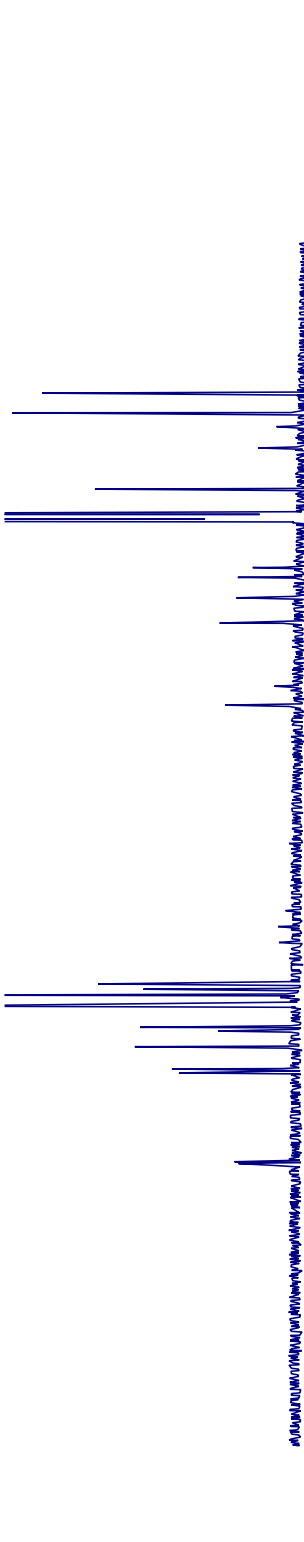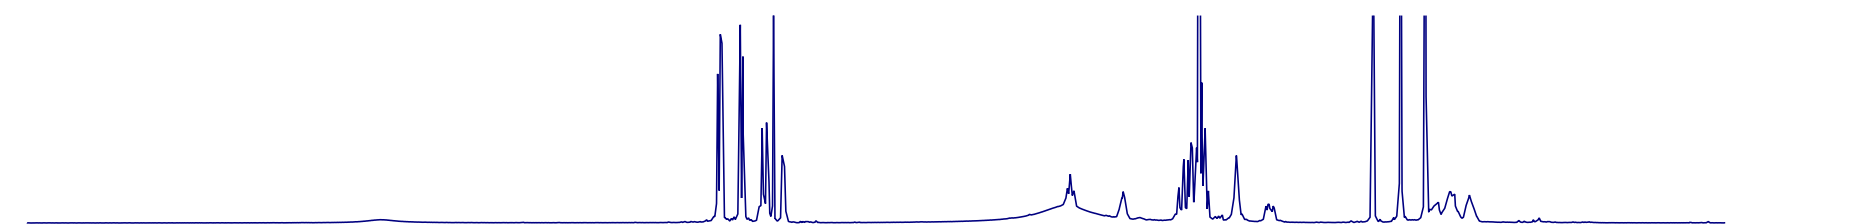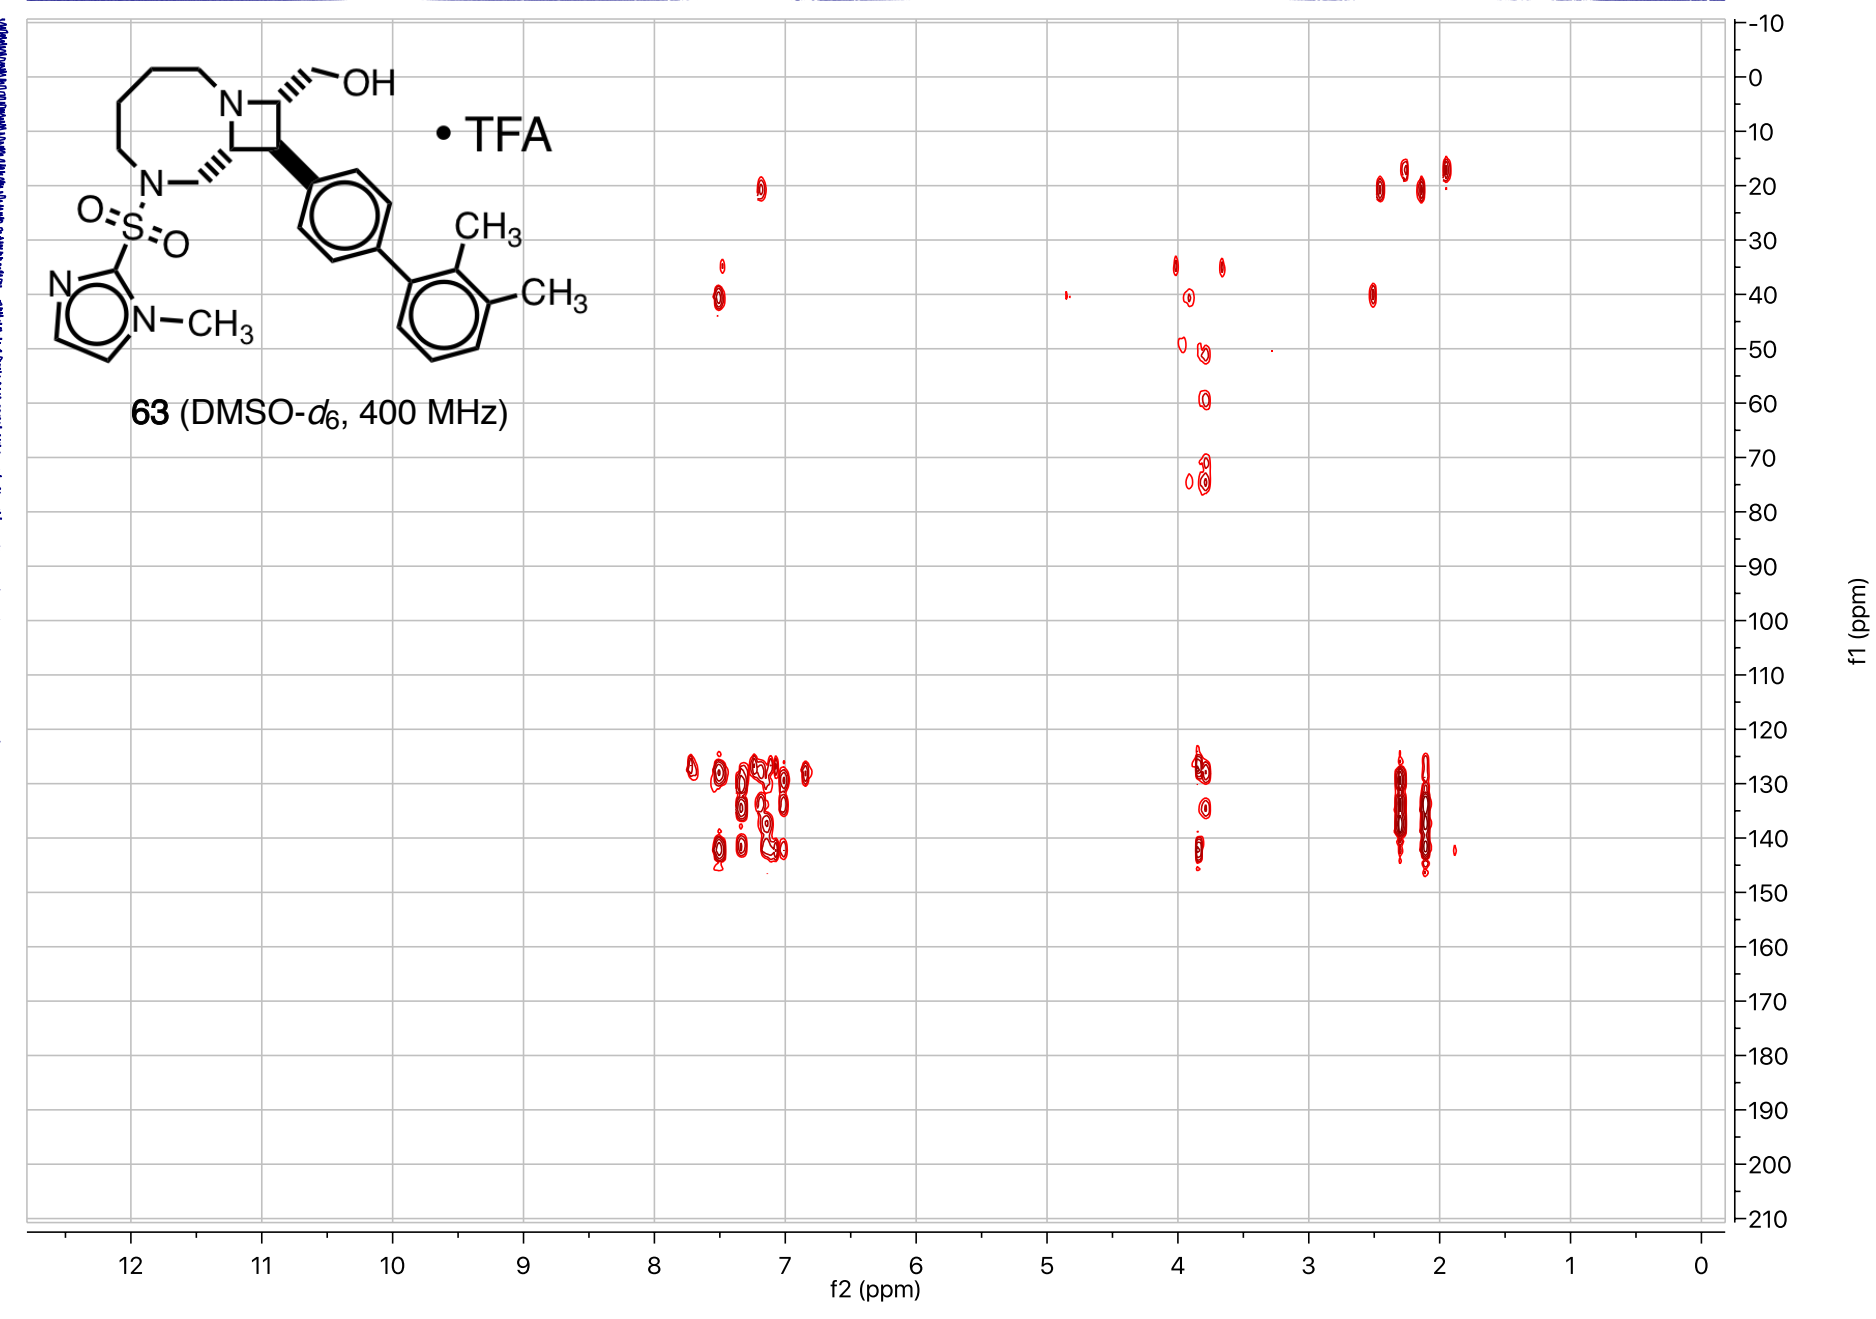

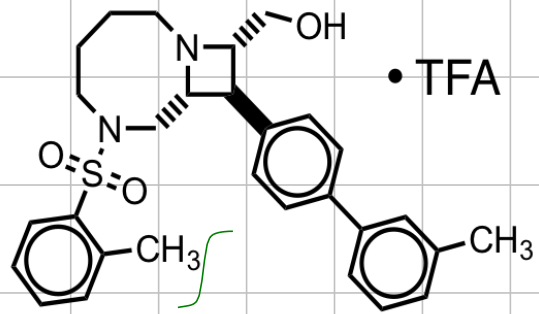

BRD8283 (5, DMSO-*d*<sub>6</sub>, 600 MHz)

BRD-K29788283-001-01-8 library reference

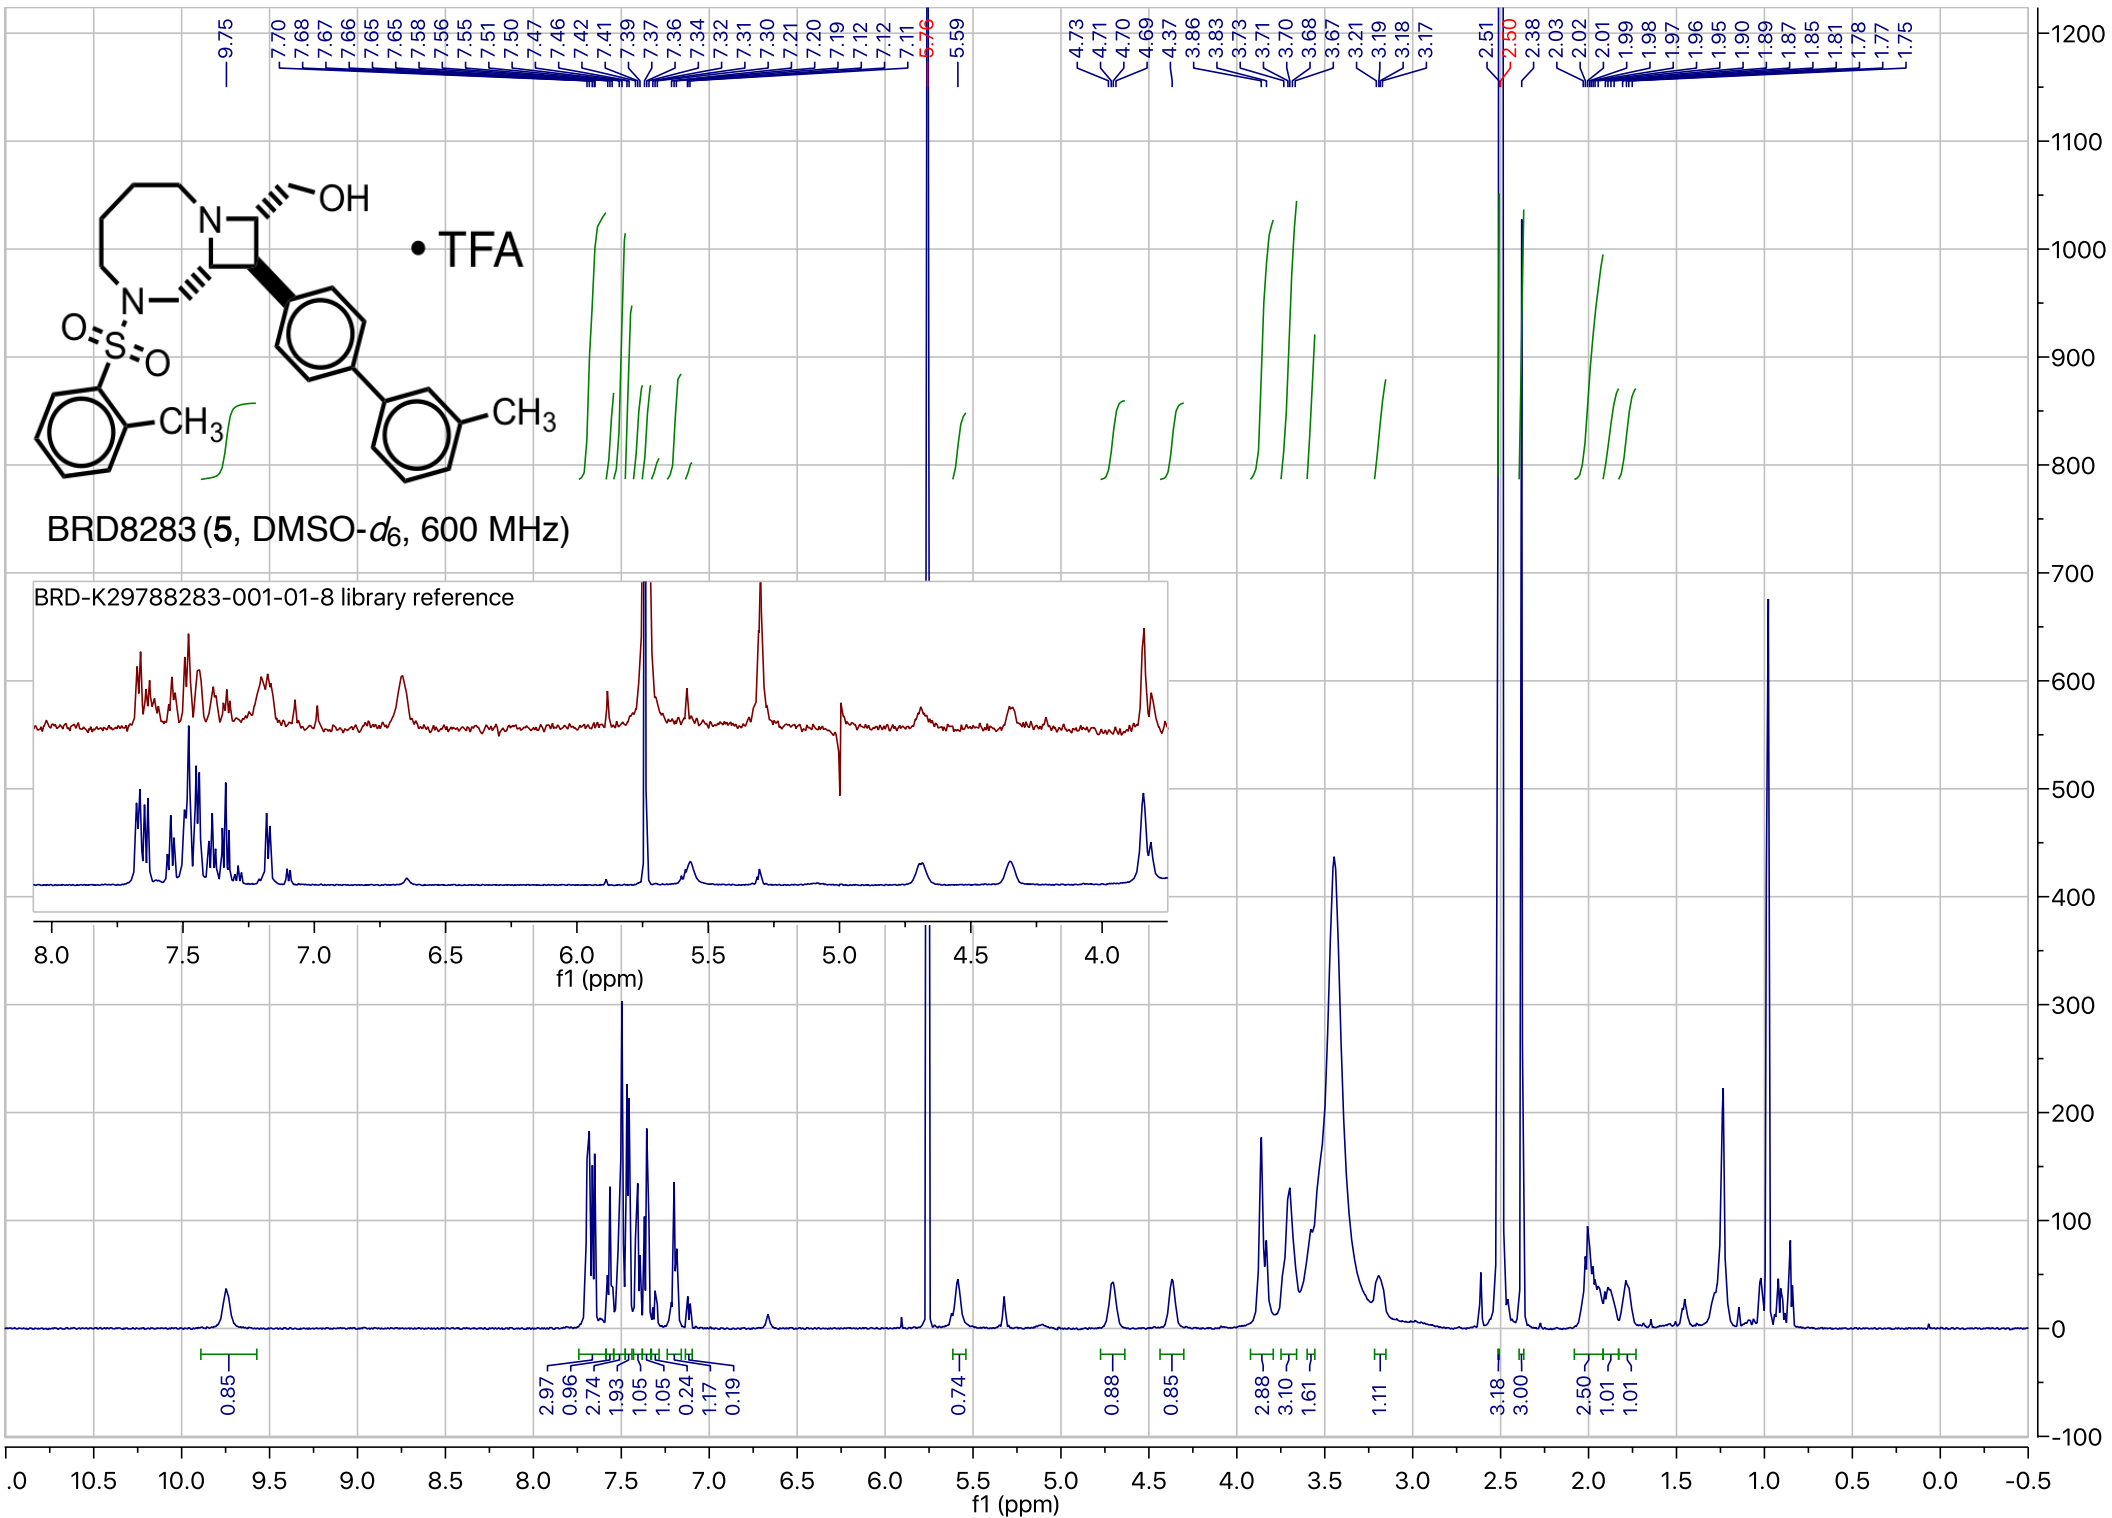

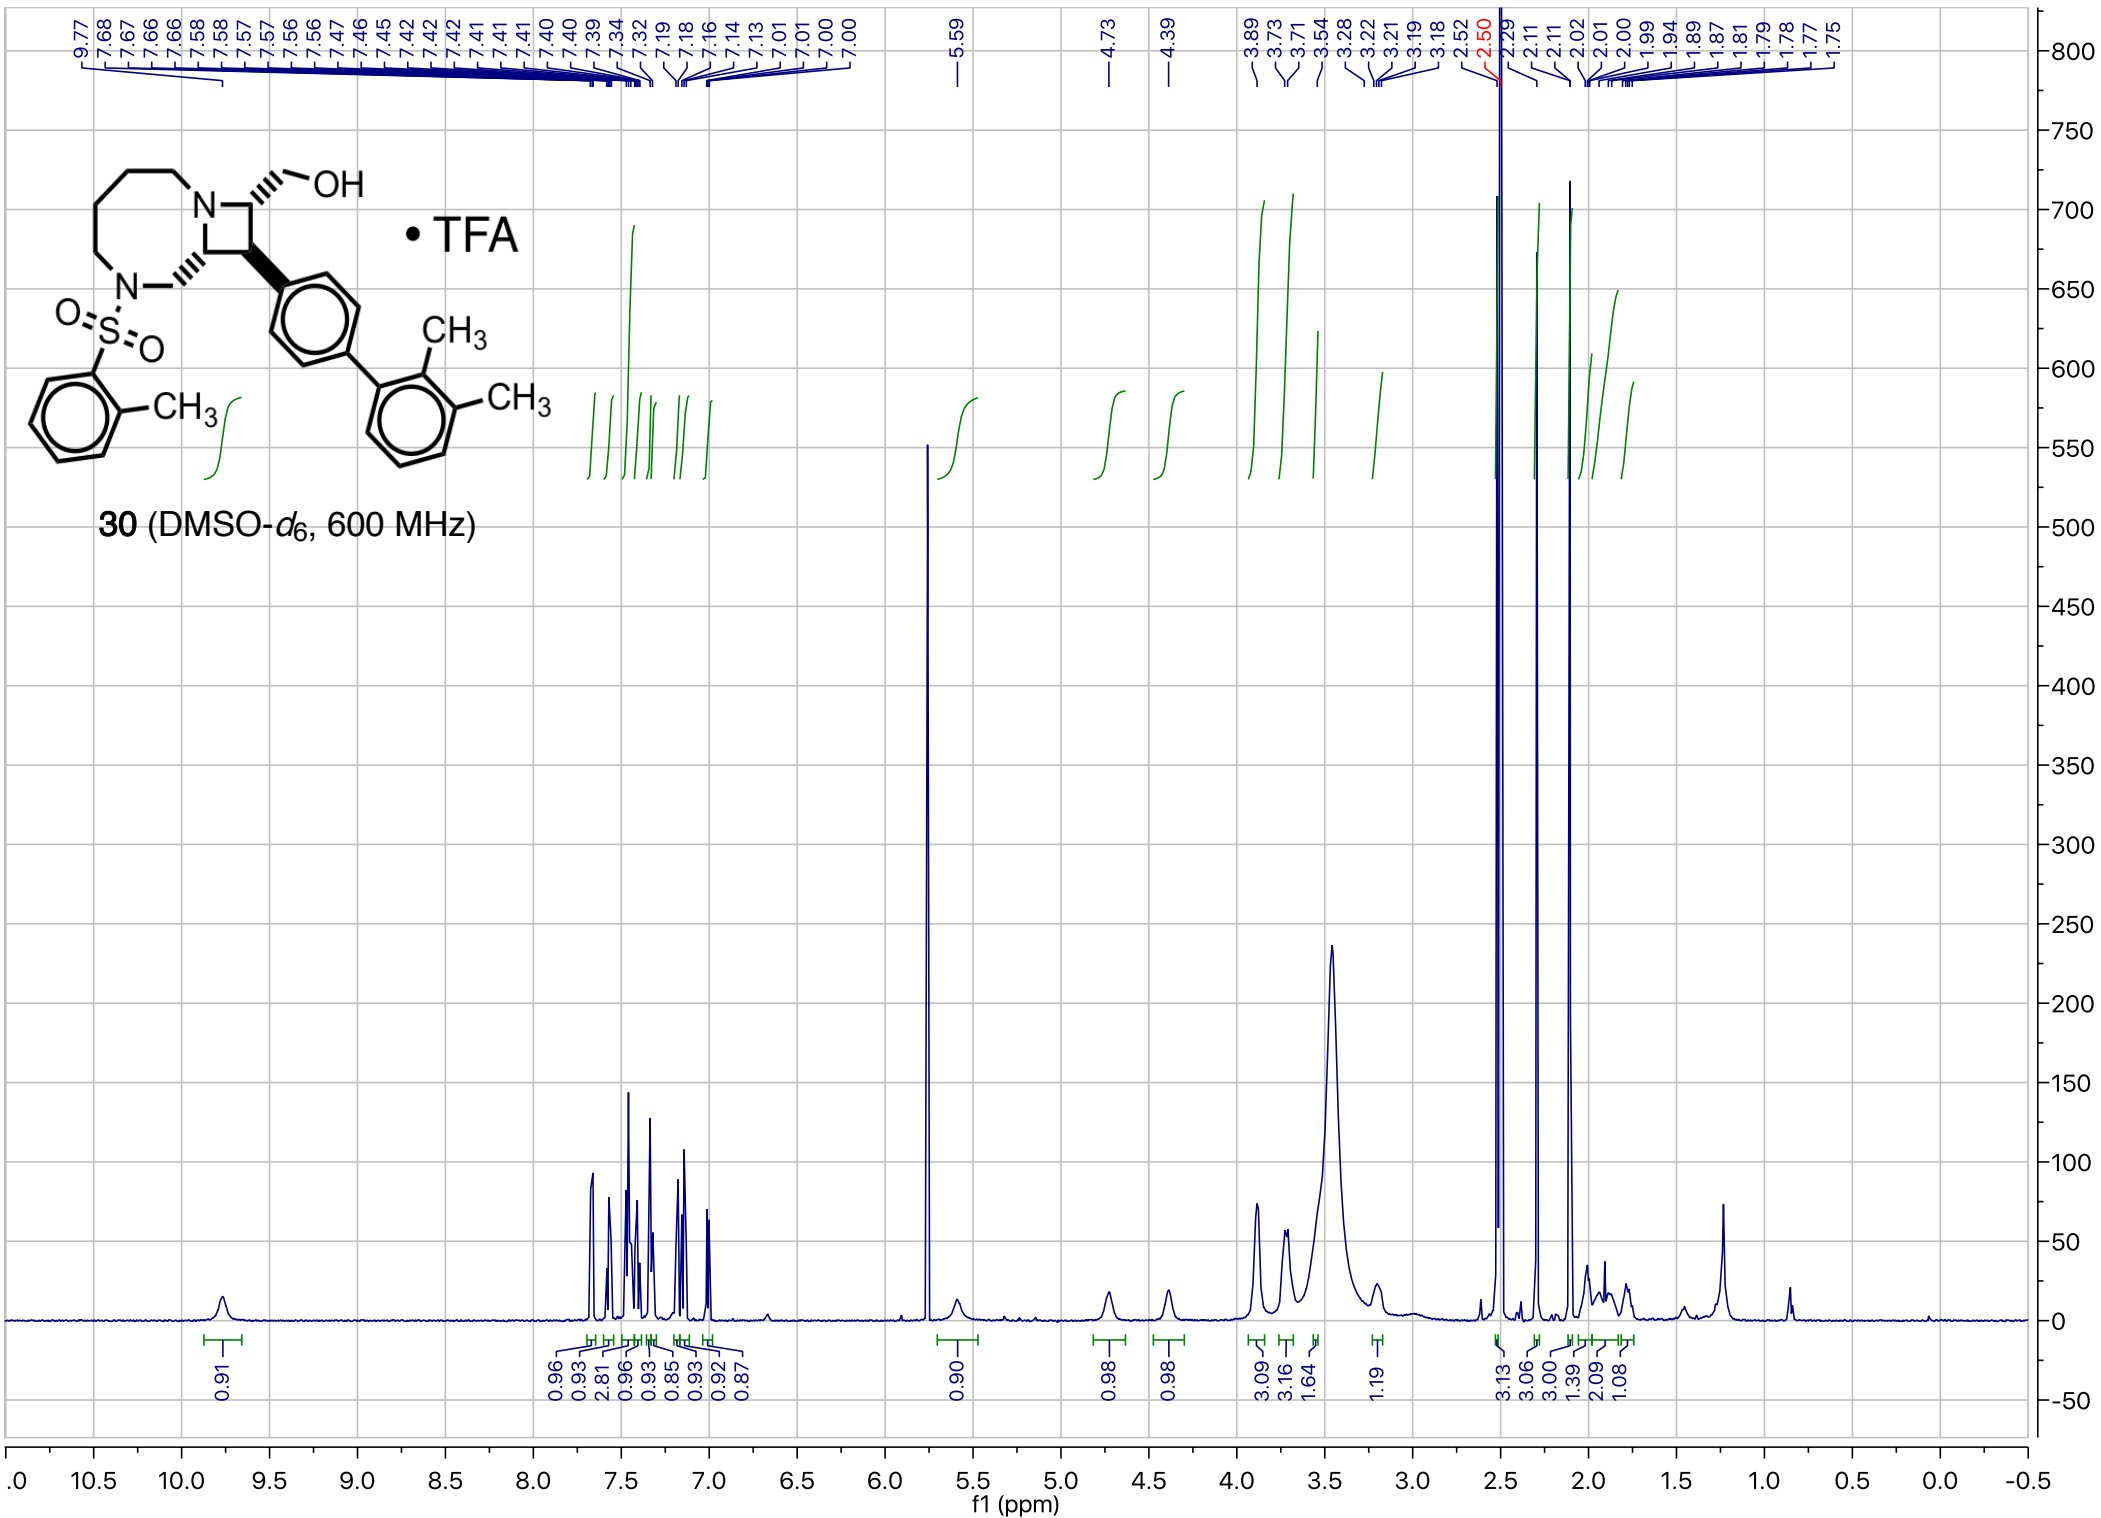

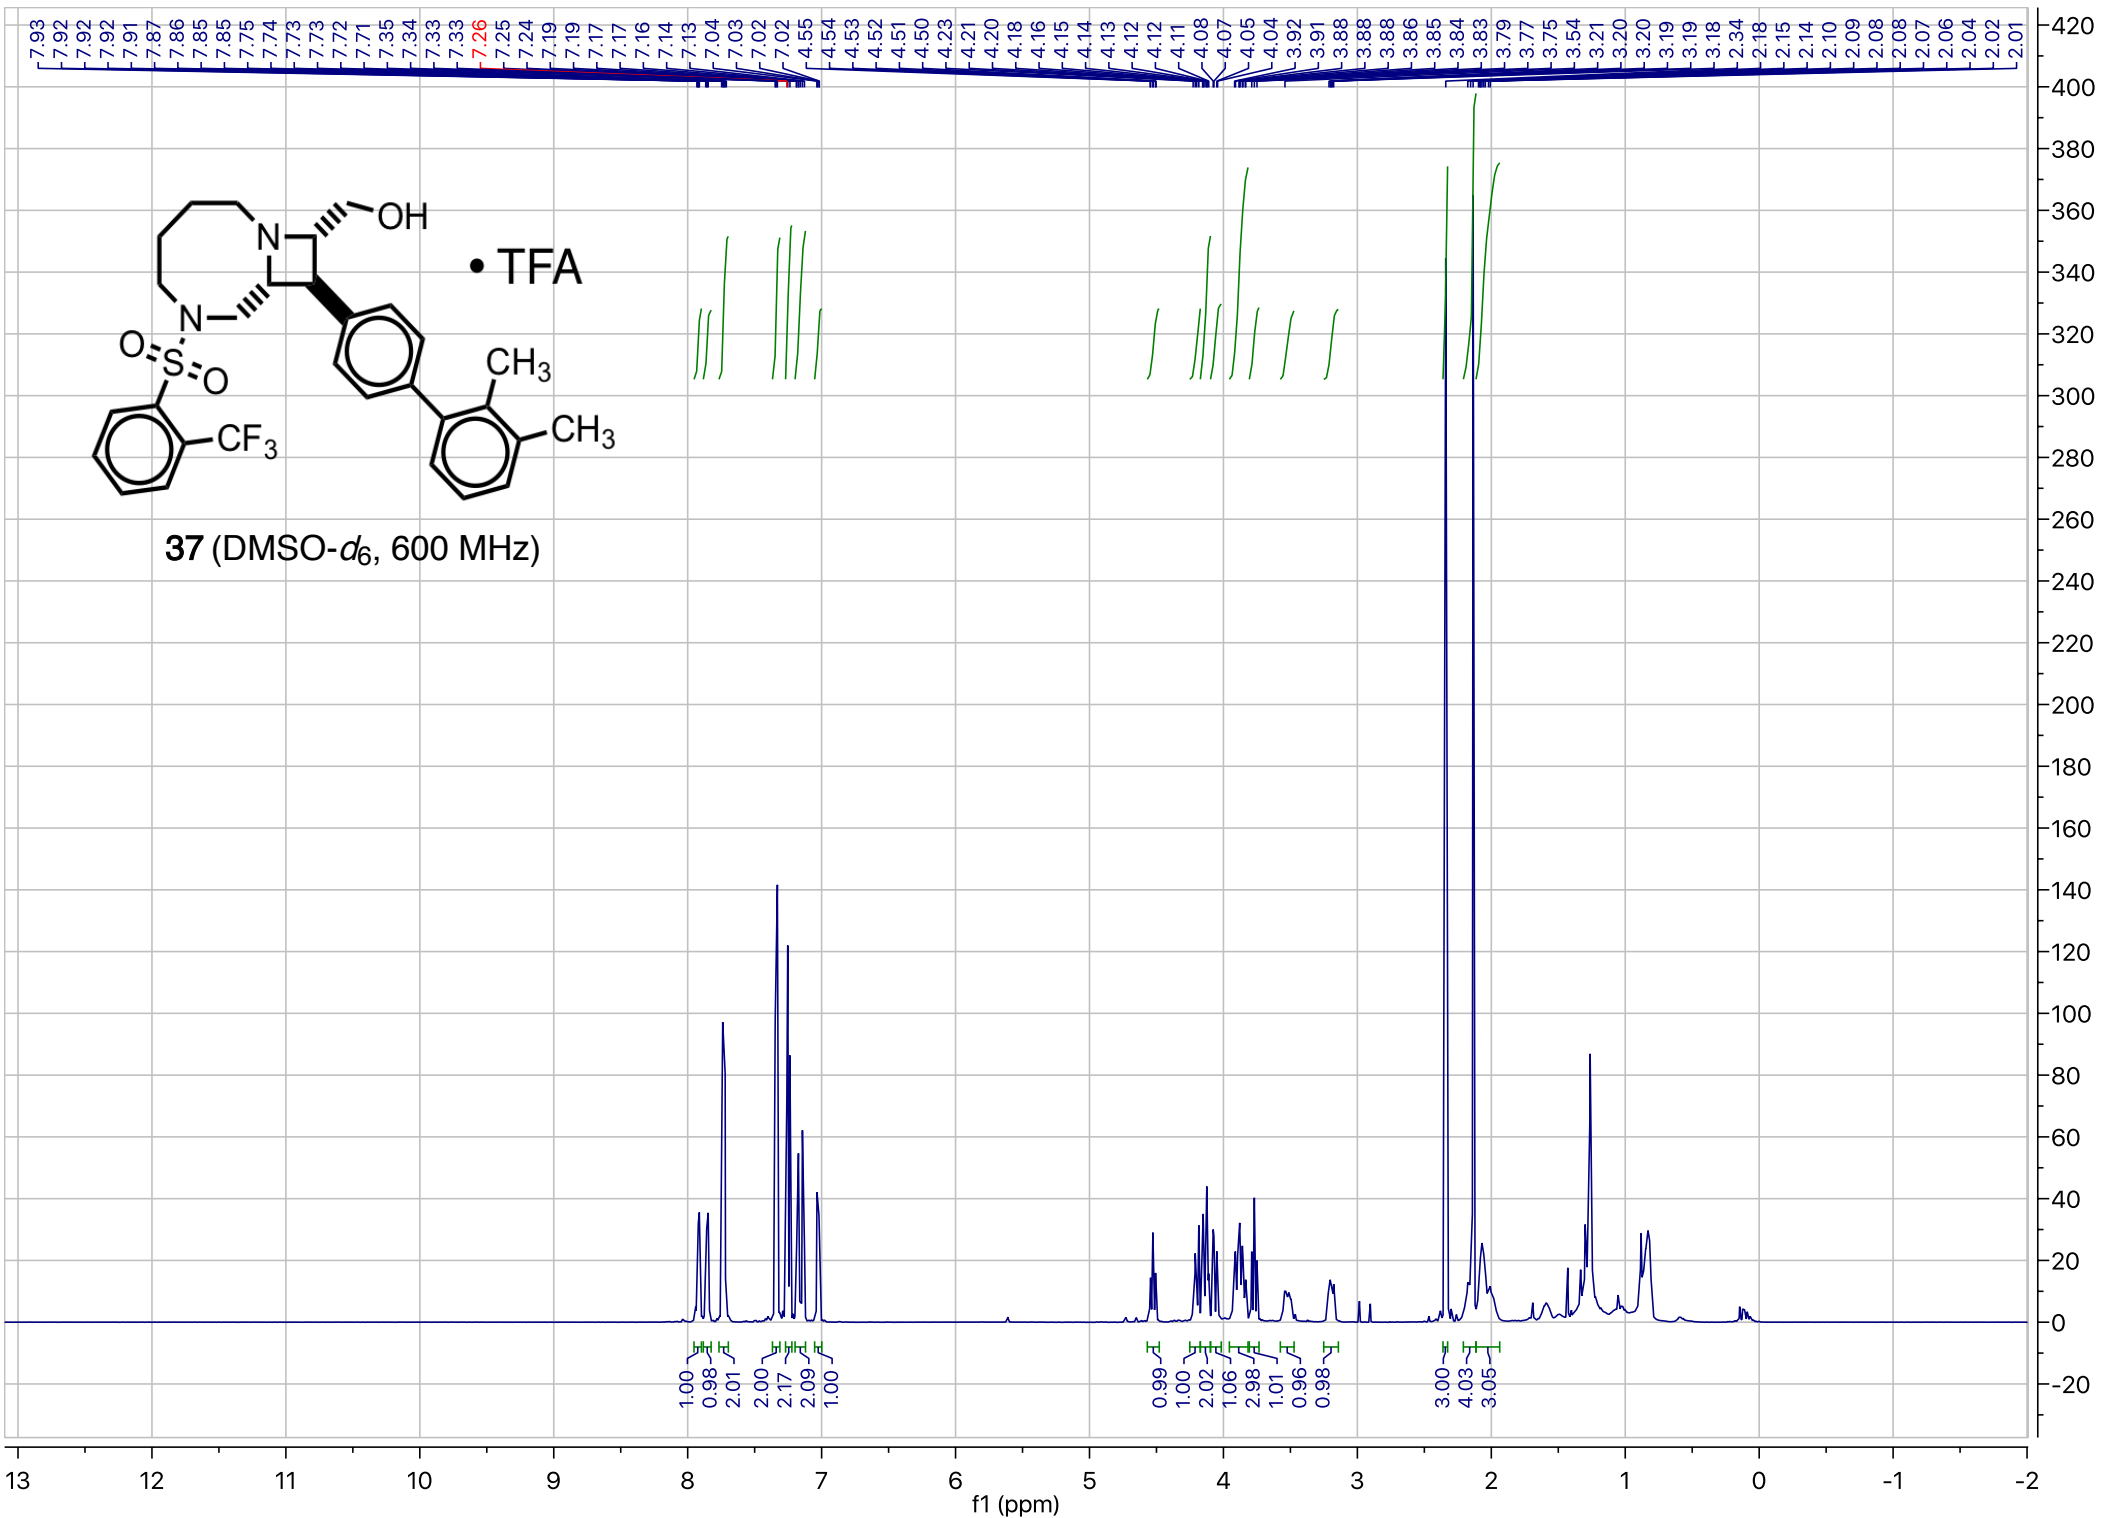



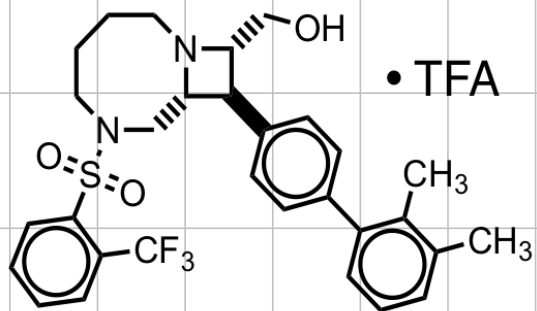

37 (DMSO-*d*<sub>6</sub>, 500 MHz)

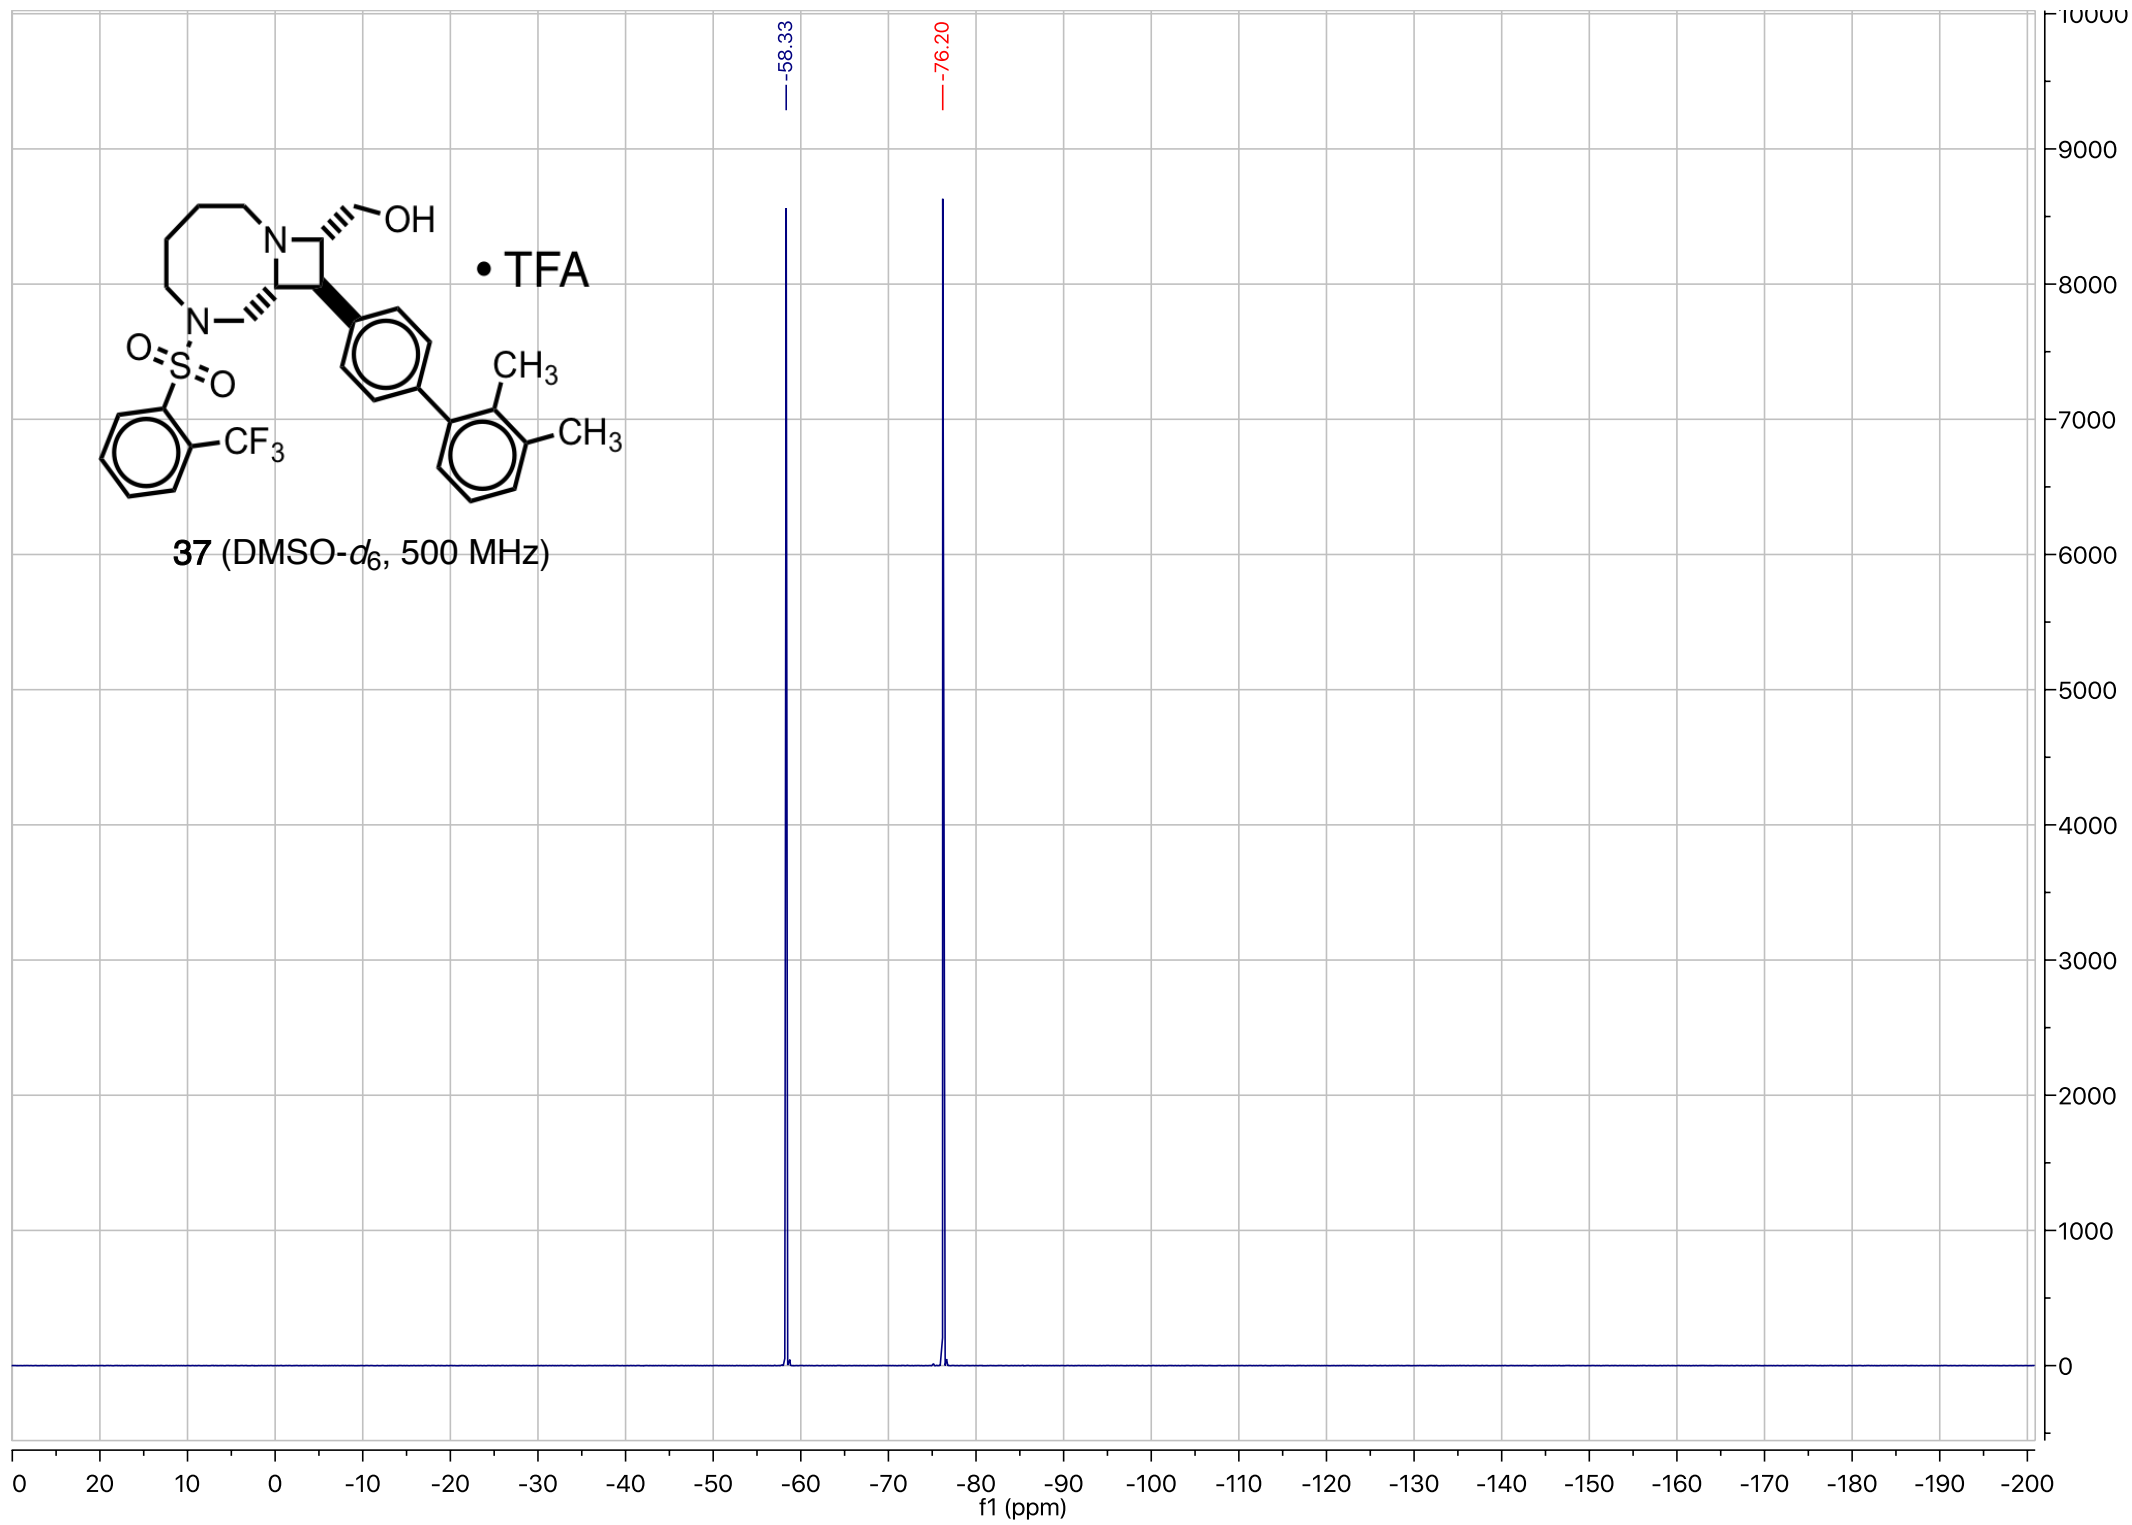

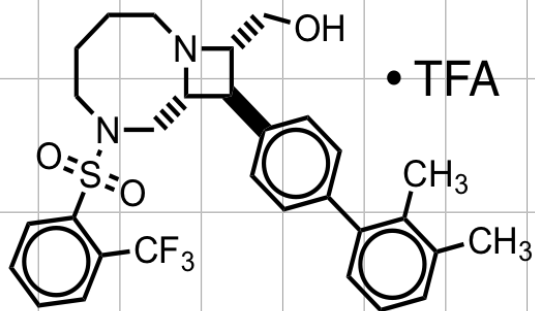

37 (DMSO-*d*<sub>6</sub>, 500 MHz)

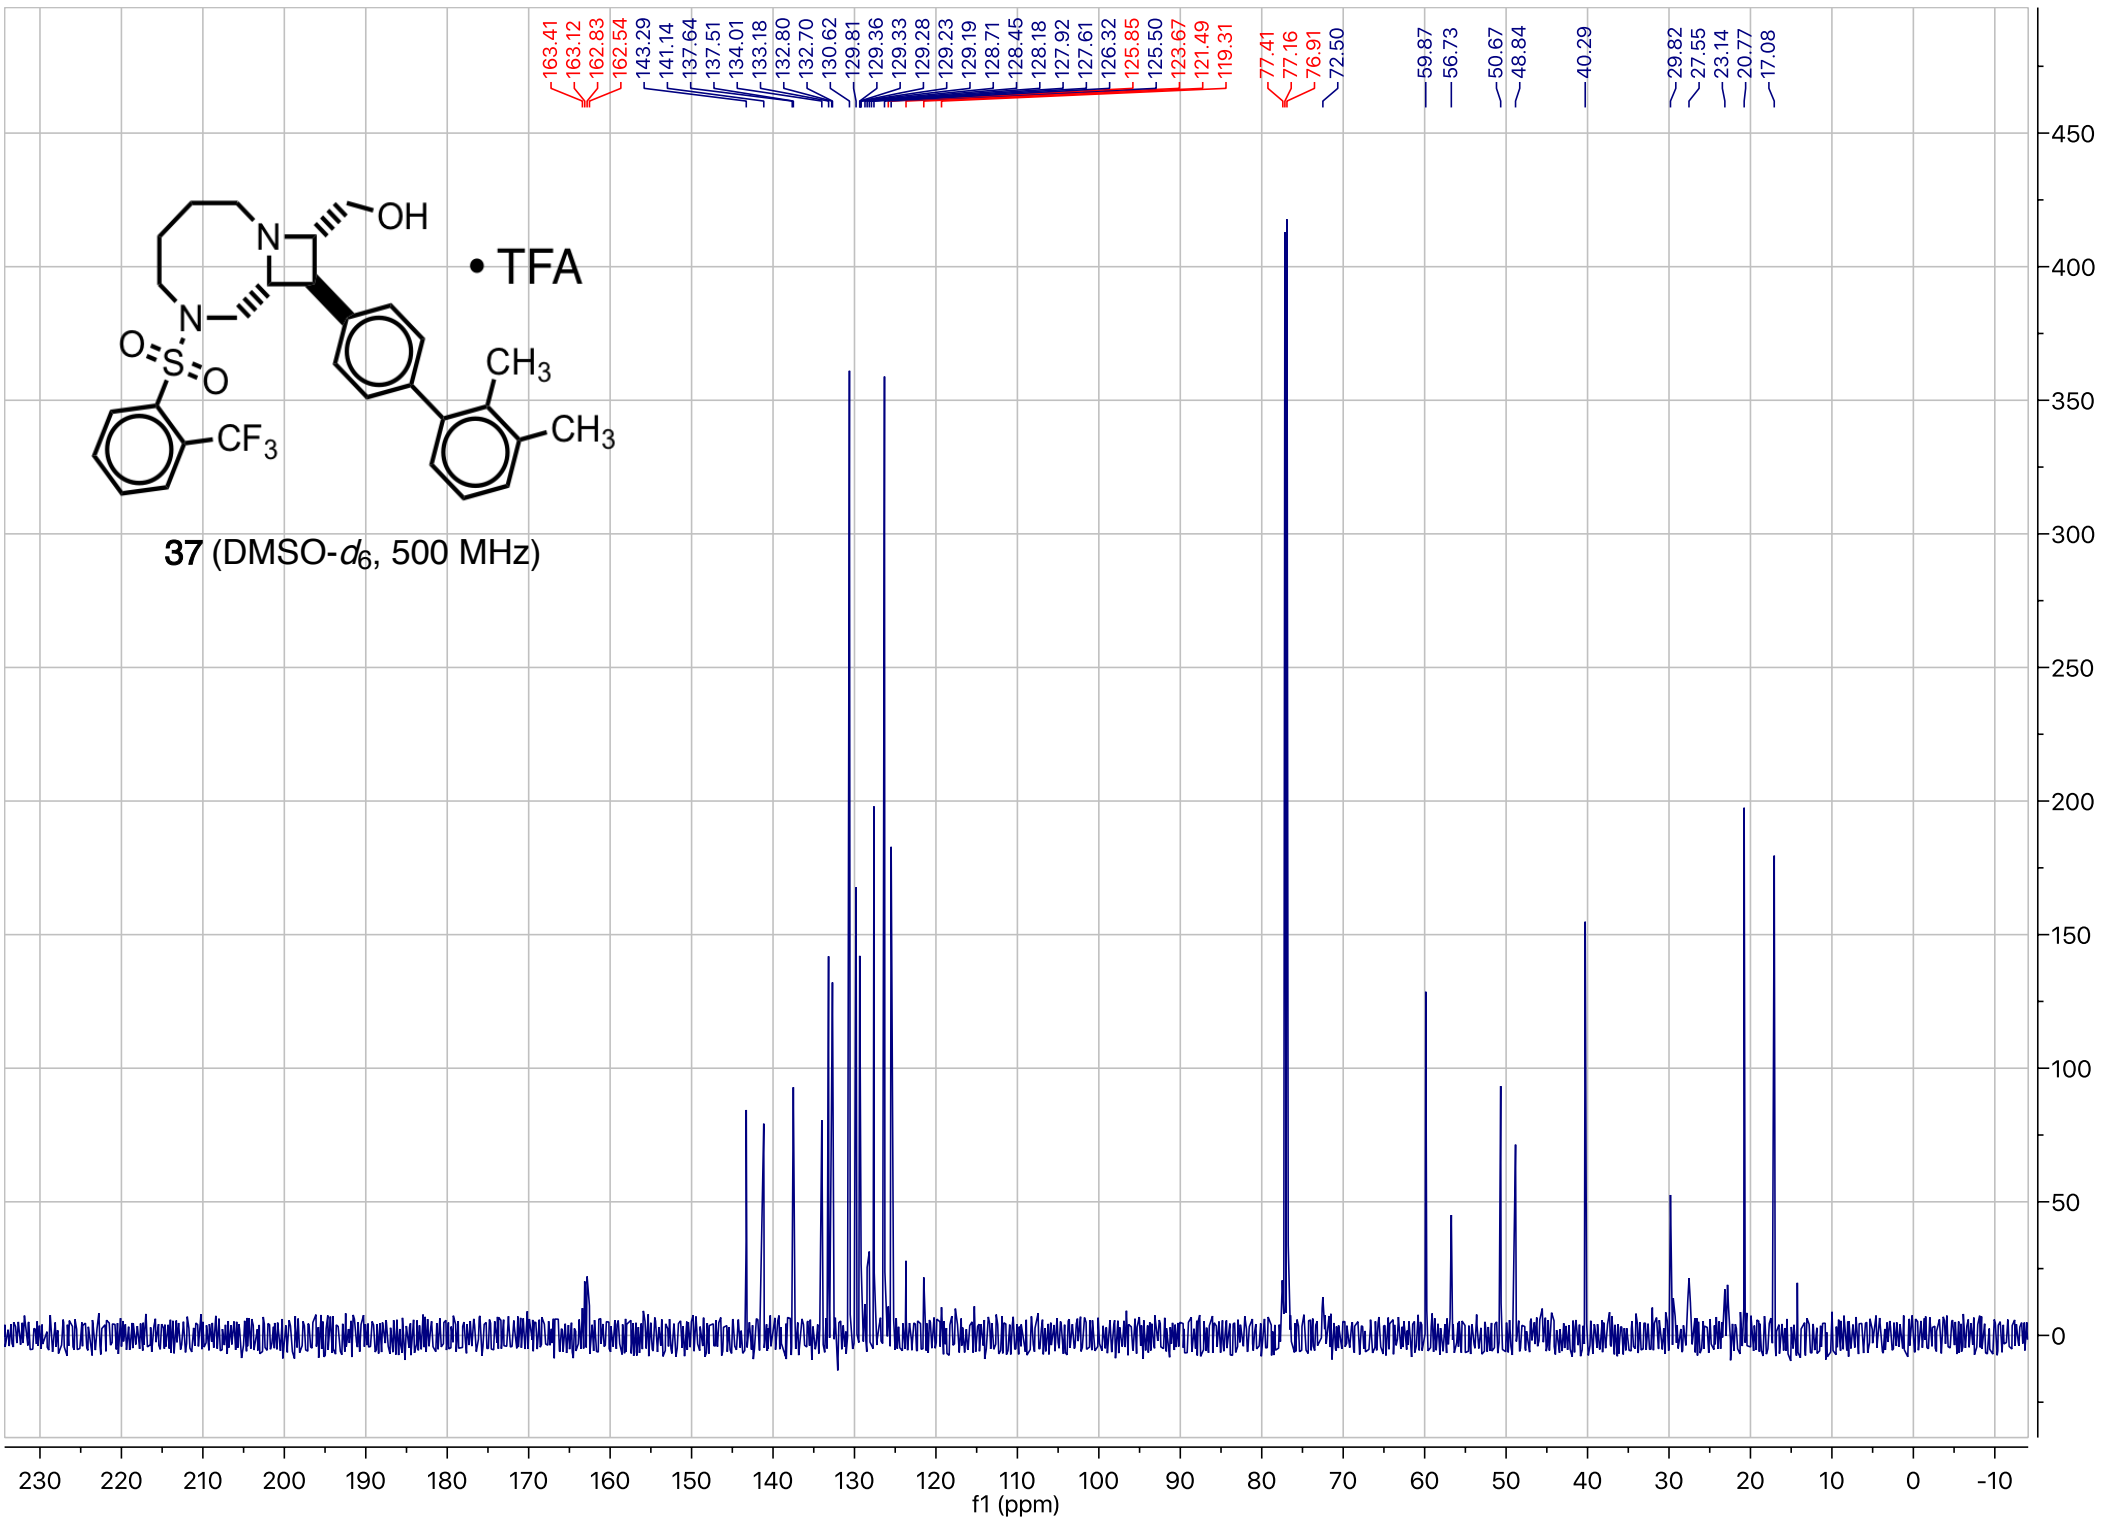

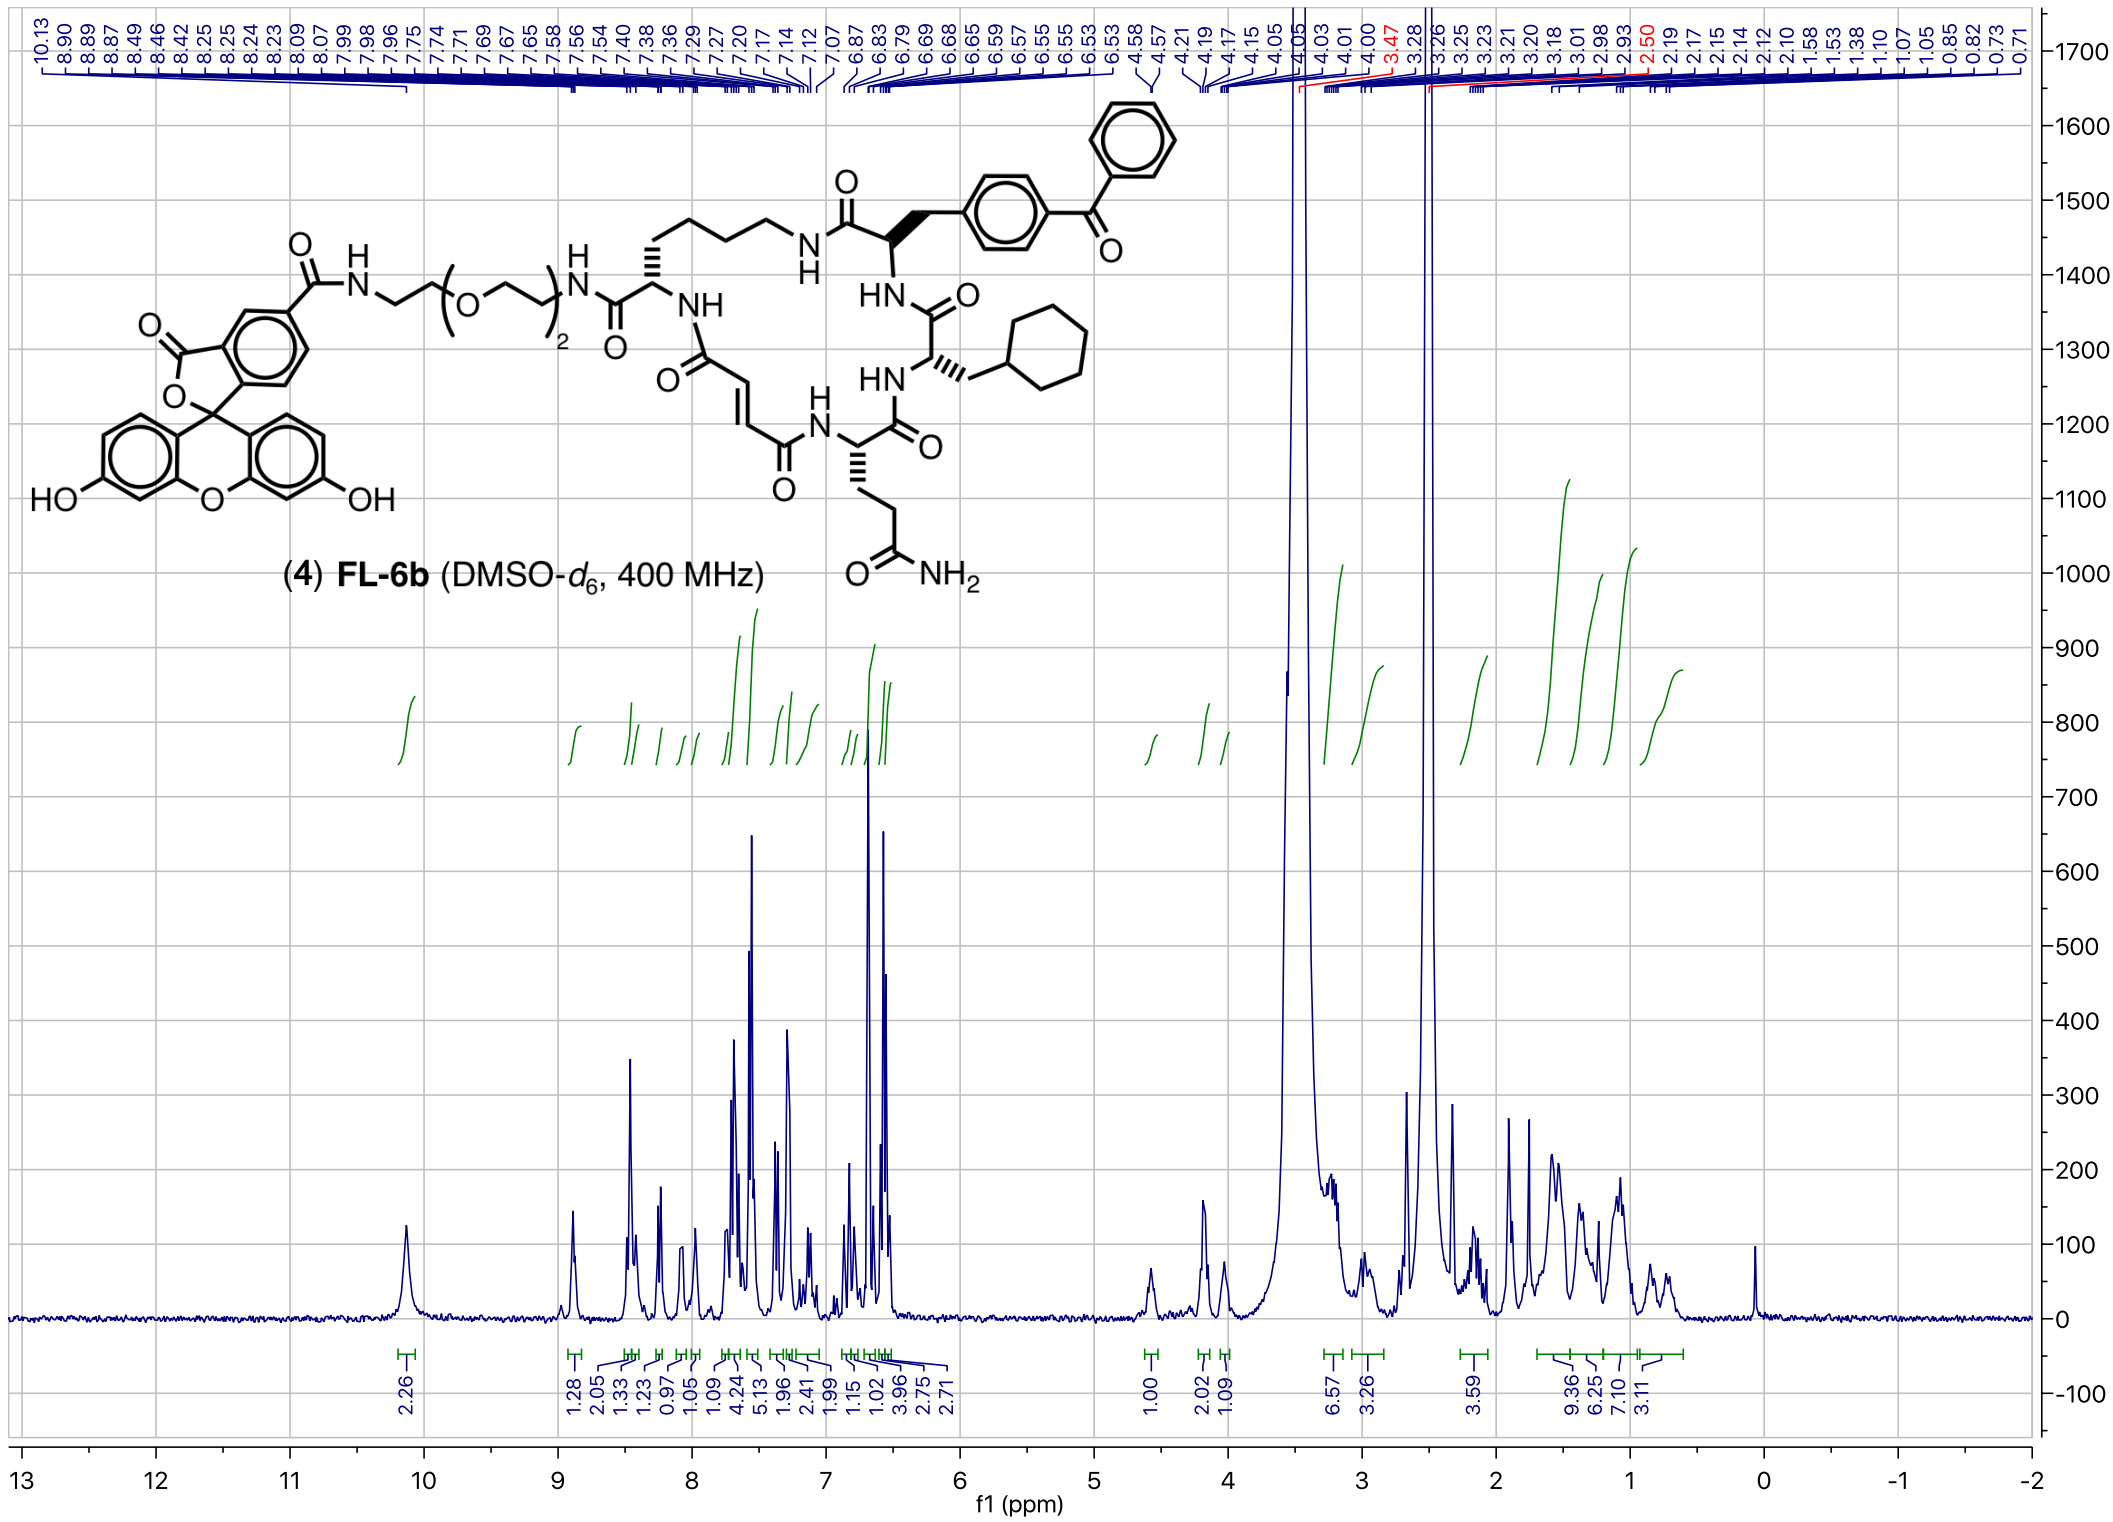

Supplement: NIHMS1524085-supplement-Supp_Data_3.pdf [file NIHMS1524085-supplement-Supp_Data_3.pdf]
