# Supplementary material
Source: PubMed Central journal article supplement (PMC6551522)
Supplement: NIHMS1524085-supplement-Supp_Data_2.pdf [file NIHMS1524085-supplement-Supp_Data_2.pdf]

## Data Report for Pharmacology Services

### Howard Hughes Medical Institute

4000 Jones Bridge Rd, Chevy Chase, MD 20815, United States

**Study #:** TW04-0003166

**Quote #:** TW04-0003166-Q07

**Client Study #:**

**Study Date:** Oct 25, 2018 - Nov 08, 2018

**PO #:**

### Compound Information

---

**Panlabs Code:** HHMI-3

**Panlabs #:** 1222268

**Alt. Code 1:** li1

**Alt. Code 2:**

**Alt. Code 3:**

**M.W.:** 743.822

### Eurofins Panlabs Discovery Services Taiwan, Ltd.

158 Li-Teh Road, Peitou

Taipei Taiwan R.O.C. 11259

Tel: + 886-2-2898-7888 • Fax: +886-2-2894-8267 • e-mail:

*Cerep and Eurofins Panlabs are two companies of the Eurofins Group*

---

Howard Hughes Medical Institute

Study #: TW04-0003166, Compound Code: li1 (1222268)

Thursday, November 08, 2018

Page 1 of 15

### Services Performed

Individual Tests (Total # of Assays: 21)

### Study Objectives

To evaluate, in Enzyme assays, the activity of test compound li1 (Panlabs # 1222268).

### Study Signatures

---

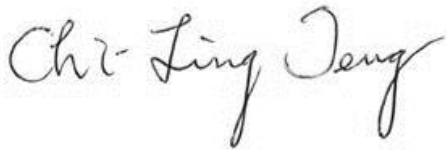

---

Chi-Ling Teng, M.A.

Study Director for Enzyme Assays

"This study was conducted according to the procedures described in this report. All data presented are authentic, accurate and correct to the best of our knowledge."

---

## Table of Contents

| Report Section                 | Page |
|--------------------------------|------|
| Cover Page                     | 1    |
| Study Signatures               | 2    |
| Table of Contents              | 3    |
| Summary                        | 4    |
| Summary of Significant Results | 5    |
| Experimental Results           | 6    |
| Methods                        | 7    |
| Literature References          | 12   |
| Reference Compounds            | 15   |

---

## Summary

### STUDY OBJECTIVE

To evaluate, in Enzyme assays, the activity of compound li1 (HHMI-3, PT# 1222268).

### METHODS

Methods employed in this study have been adapted from the scientific literature to maximize reliability and reproducibility. Reference standards were run as an integral part of each assay to ensure the validity of the results obtained. Assays were performed under conditions described in the accompanying "Methods" section of this report.

Where presented,  $IC_{50}$  values were determined by a non-linear, least squares regression analysis using MathIQ™ (ID Business Solutions Ltd., UK). Where inhibition constants ( $K_i$ ) are presented, the  $K_i$  values were calculated using the equation of Cheng and Prusoff (Cheng, Y., Prusoff, W.H., *Biochem. Pharmacol.* **22**:3099-3108, 1973) using the observed  $IC_{50}$  of the tested compound, the concentration of radioligand employed in the assay, and the historical values for the  $K_D$  of the ligand (obtained experimentally at **Eurofins Panlabs, Inc.**). Where presented, the Hill coefficient ( $n_H$ ), defining the slope of the competitive binding curve, was calculated using MathIQ™. Hill coefficients significantly different than 1.0, may suggest that the binding displacement does not follow the laws of mass action with a single binding site. Where  $IC_{50}$ ,  $K_i$ , and/or  $n_H$  data are presented without Standard Error of the Mean (SEM), data are insufficient to be quantitative, and the values presented ( $K_i$ ,  $IC_{50}$ ,  $n_H$ ) should be interpreted with caution.

### RESULTS

A summary of results meeting the significance criteria is presented in the following sections. Complete results are presented under the section labeled "Experimental Results". Individual responses, if requested, are presented in the section labeled "Individual Responses".

### SUMMARY/CONCLUSION

Significant results are displayed in the following table(s) in rank order of potency for estimated  $IC_{50}$  and/or  $K_i$  values.

## Summary of Significant Results

Biochemical assay results are presented as the percent inhibition of specific binding or activity throughout the report. All other results are expressed in terms of that assay's quantitation method.

- For primary assays, only the lowest concentration with a significant response judged by the assays' criteria, is shown in this summary.
- Where applicable, either the secondary assay results with the lowest dose/concentration meeting the significance criteria or, if inactive, the highest dose/concentration that did not meet the significance criteria is shown.
- Unless otherwise requested, primary screening in duplicate with quantitative data (e.g.,  $IC_{50} \pm SEM$ ,  $K_i \pm SEM$  and  $n_H$ ) are shown where applicable for individual requested assays. In screening packages, primary screening in duplicate with semi-quantitative data (e.g., estimated  $IC_{50}$ ,  $K_i$  and  $n_H$ ) are shown where applicable (concentration range of 4 log units); available secondary functional assays are carried out (30 mM) and MEC or MIC determined only if active in primary assays >50% at 1 log unit below initial test concentration.

Significant responses ( $\geq 50\%$  inhibition or stimulation for Biochemical assays) were noted in the primary assays listed below:

| Cat #  | Assay Name                                      | Species | Conc.     | % Inh. | $IC_{50}^*$ | $K_i$ | $n_H$ |
|--------|-------------------------------------------------|---------|-----------|--------|-------------|-------|-------|
| 115200 | Peptidase, Matrix Metalloproteinase-12 (MMP-12) | hum     | 1 $\mu$ M | 98     |             |       |       |

\* A standard error of the mean is presented where results are based on multiple, independent determinations.  
hum=Human

## Experimental Results

| Cat #                               | Assay Name                                                  | Batch* | Spec. | Rep. | Conc. | % Inh. | IC <sub>50</sub> * | K <sub>i</sub> | n <sub>H</sub> | R |
|-------------------------------------|-------------------------------------------------------------|--------|-------|------|-------|--------|--------------------|----------------|----------------|---|
| <b>Compound: li1, PT #: 1222268</b> |                                                             |        |       |      |       |        |                    |                |                |   |
| 112250                              | Peptidase, CTSB (Cathepsin B)                               | 429901 | hum   | 1    | 1 µM  | 4      |                    |                |                |   |
| 112350                              | Peptidase, CTSD (Cathepsin D)                               | 430131 | hum   | 1    | 1 µM  | -2     |                    |                |                |   |
| 199007                              | Peptidase, Dipeptidyl Peptidase 4 (DPP4, DPP IV)            | 429912 | hum   | 1    | 1 µM  | -3     |                    |                |                |   |
| 163950                              | Peptidase, Endothelin Converting Enzyme-1 (ECE-1)           | 429910 | hum   | 1    | 1 µM  | -6     |                    |                |                |   |
| 114110                              | Peptidase, Matrix Metalloproteinase-1 (MMP-1)               | 430051 | hum   | 1    | 1 µM  | 0      |                    |                |                |   |
| 114210                              | Peptidase, Matrix Metalloproteinase-2 (MMP-2)               | 429904 | hum   | 1    | 1 µM  | 22     |                    |                |                |   |
| 114310                              | Peptidase, Matrix Metalloproteinase-3 (MMP-3)               | 430052 | hum   | 1    | 1 µM  | 6      |                    |                |                |   |
| 114710                              | Peptidase, Matrix Metalloproteinase-7 (MMP-7)               | 429905 | hum   | 1    | 1 µM  | 8      |                    |                |                |   |
| 114800                              | Peptidase, Matrix Metalloproteinase-8 (MMP-8)               | 430053 | hum   | 1    | 1 µM  | 22     |                    |                |                |   |
| 114910                              | Peptidase, Matrix Metalloproteinase-9 (MMP-9)               | 430054 | hum   | 1    | 1 µM  | 3      |                    |                |                |   |
| 114950                              | Peptidase, Matrix Metalloproteinase-10 (MMP-10)             | 430055 | hum   | 1    | 1 µM  | 10     |                    |                |                |   |
| 115200                              | Peptidase, Matrix Metalloproteinase-12 (MMP-12)             | 429906 | hum   | 1    | 1 µM  | 98     |                    |                |                |   |
| 115300                              | Peptidase, Matrix Metalloproteinase-13 (MMP-13)             | 430056 | hum   | 1    | 1 µM  | 14     |                    |                |                |   |
| 115400                              | Peptidase, Matrix Metalloproteinase-14 (MMP-14)             | 430057 | hum   | 1    | 1 µM  | 16     |                    |                |                |   |
| 115450                              | Peptidase, Matrix Metalloproteinase-15 (MMP-15)             | 430058 | hum   | 1    | 1 µM  | 9      |                    |                |                |   |
| 115490                              | Peptidase, Matrix Metalloproteinase-17 (MMP-17)             | 430061 | hum   | 1    | 1 µM  | 1      |                    |                |                |   |
| 115510                              | Peptidase, Matrix Metalloproteinase-19 (MMP-19)             | 430062 | hum   | 1    | 1 µM  | 2      |                    |                |                |   |
| 115520                              | Peptidase, Matrix Metalloproteinase-20 (MMP-20)             | 430059 | hum   | 1    | 1 µM  | 2      |                    |                |                |   |
| 115560                              | Peptidase, Matrix Metalloproteinase-24 (MMP-24)             | 430060 | hum   | 1    | 1 µM  | 46     |                    |                |                |   |
| 164010                              | Peptidase, Metalloproteinase, Neutral Endopeptidase         | 429911 | hum   | 1    | 1 µM  | -10    |                    |                |                |   |
| 166500                              | Peptidase, Tumor Necrosis Factor-α Converting Enzyme (TACE) | 430142 | hum   | 1    | 1 µM  | 34     |                    |                |                |   |

Note: Items meeting criteria for significance (≥50% stimulation or inhibition) are highlighted.

\* Batch: Represents compounds tested concurrently in the same assay(s).

hum=Human

## Methods

### ■ 112250 Peptidase, CTSB (Cathepsin B)

|                            |                                       |                              |                                                          |
|----------------------------|---------------------------------------|------------------------------|----------------------------------------------------------|
| <b>Source:</b>             | Human liver                           | <b>Pre-Incub. Time/Temp:</b> | 15 minutes @ 25°C                                        |
| <b>Substrate:</b>          | 20.0 µM Boc-Leu-Arg-Arg-AMC           | <b>Incubation Time/Temp:</b> | 30 minutes @ 25°C                                        |
| <b>Vehicle:</b>            | 1.00% DMSO                            | <b>Incubation Buffer:</b>    | 50 mM CH <sub>3</sub> COONa, pH 5.5, 1 mM DTT, 2 mM EDTA |
| <b>Significance Crit.:</b> | ≥50% of max stimulation or inhibition |                              |                                                          |
|                            |                                       | <b>Quantitation Method:</b>  | Spectrofluorimetric quantitation of AMC                  |

### ■ 112350 Peptidase, CTSD (Cathepsin D)

|                            |                                                                                  |                              |                                                                   |
|----------------------------|----------------------------------------------------------------------------------|------------------------------|-------------------------------------------------------------------|
| <b>Source:</b>             | Human liver                                                                      | <b>Pre-Incub. Time/Temp:</b> | 15 minutes @ 37°C                                                 |
| <b>Substrate:</b>          | 20.0 µM MOCAC-Gly-Lys-Pro-Ile-Leu-Phe-Phe-Arg-Leu-Lys(Dnp)-D-Arg-NH <sub>2</sub> | <b>Incubation Time/Temp:</b> | 10 minutes @ 37°C                                                 |
| <b>Vehicle:</b>            | 1.00% DMSO                                                                       | <b>Incubation Buffer:</b>    | 50 mM CH <sub>3</sub> COONa, pH 4.0                               |
| <b>Significance Crit.:</b> | ≥50% of max stimulation or inhibition                                            |                              |                                                                   |
|                            |                                                                                  | <b>Quantitation Method:</b>  | Spectrofluorimetric quantitation of MOCAC-Gly-Lys-Pro-Ile-Leu-Phe |

### ■ 199007 Peptidase, Dipeptidyl Peptidase 4 (DPP4, DPP IV)

|                            |                                      |                              |                                                          |
|----------------------------|--------------------------------------|------------------------------|----------------------------------------------------------|
| <b>Source:</b>             | Human recombinant insect cells       | <b>Pre-Incub. Time/Temp:</b> | 10 minutes @ 25°C                                        |
| <b>Substrate:</b>          | 40.0 µM GP-AMC                       | <b>Incubation Time/Temp:</b> | 10 minutes @ 25°C                                        |
| <b>Vehicle:</b>            | 1.00% DMSO                           | <b>Incubation Buffer:</b>    | 50 mM Tris-HCl, pH 7.4                                   |
| <b>Significance Crit.:</b> | ≥50 of max stimulation or inhibition |                              |                                                          |
|                            |                                      | <b>Quantitation Method:</b>  | Spectrofluorimetric quantitation of aminomethyl coumarin |

### ■ 163950 Peptidase, Endothelin Converting Enzyme-1 (ECE-1)

|                            |                                                      |                              |                                                                     |
|----------------------------|------------------------------------------------------|------------------------------|---------------------------------------------------------------------|
| <b>Source:</b>             | Human recombinant NS0 cells                          | <b>Pre-Incub. Time/Temp:</b> | 15 minutes @ 25°C                                                   |
| <b>Substrate:</b>          | 10.0 µM Mca-Arg-Pro-Pro-Gly-Phe-Ser-Ala-Phe-Lys(Dnp) | <b>Incubation Time/Temp:</b> | 60 minutes @ 25°C                                                   |
| <b>Vehicle:</b>            | 1.00% DMSO                                           | <b>Incubation Buffer:</b>    | 100 mM NaCl, 100 mM MES, pH 6.0                                     |
| <b>Significance Crit.:</b> | ≥50% of max stimulation or inhibition                |                              |                                                                     |
|                            |                                                      | <b>Quantitation Method:</b>  | Spectrofluorimetric quantitation of Mca-Arg-Pro-Pro-Gly-Phe-Ser-Ala |

### ■ 114110 Peptidase, Matrix Metalloproteinase-1 (MMP-1)

|                            |                                                        |                              |                                                                                       |
|----------------------------|--------------------------------------------------------|------------------------------|---------------------------------------------------------------------------------------|
| <b>Source:</b>             | Human rheumatoid synovial fibroblast                   | <b>Pre-Incub. Time/Temp:</b> | 60 minutes @ 37°C                                                                     |
| <b>Substrate:</b>          | 4.0 µM Mca-Pro-Leu-Gly-Leu-Dap-Ala-Arg-NH <sub>2</sub> | <b>Incubation Time/Temp:</b> | 2 hours @ 37°C                                                                        |
| <b>Vehicle:</b>            | 1.00% DMSO                                             | <b>Incubation Buffer:</b>    | 50 mM MOPS, pH 7.2, 10 mM CaCl <sub>2</sub> , 10 µM ZnCl <sub>2</sub> , 0.05% Brij 35 |
| <b>Significance Crit.:</b> | ≥50% of max stimulation or inhibition                  |                              |                                                                                       |
|                            |                                                        | <b>Quantitation Method:</b>  | Spectrofluorimetric quantitation of Mca-Pro-Leu-Gly                                   |

## Methods

### ■ 114210 Peptidase, Matrix Metalloproteinase-2 (MMP-2)

|                            |                                                        |                              |                                                                                       |
|----------------------------|--------------------------------------------------------|------------------------------|---------------------------------------------------------------------------------------|
| <b>Source:</b>             | Human recombinant CHO cells                            | <b>Pre-Incub. Time/Temp:</b> | 60 minutes @ 37°C                                                                     |
| <b>Substrate:</b>          | 4.0 µM Mca-Pro-Leu-Gly-Leu-Dap-Ala-Arg-NH <sub>2</sub> | <b>Incubation Time/Temp:</b> | 2 hours @ 37°C                                                                        |
| <b>Vehicle:</b>            | 1.00% DMSO                                             | <b>Incubation Buffer:</b>    | 50 mM MOPS, pH 7.2, 10 mM CaCl <sub>2</sub> , 10 µM ZnCl <sub>2</sub> , 0.05% Brij 35 |
| <b>Significance Crit.:</b> | ≥50% of max stimulation or inhibition                  | <b>Quantitation Method:</b>  | Spectrofluorimetric quantitation of Mca-Pro-Leu-Gly                                   |

### ■ 114310 Peptidase, Matrix Metalloproteinase-3 (MMP-3)

|                            |                                                        |                              |                                                                                       |
|----------------------------|--------------------------------------------------------|------------------------------|---------------------------------------------------------------------------------------|
| <b>Source:</b>             | Human recombinant E. coli                              | <b>Pre-Incub. Time/Temp:</b> | 60 minutes @ 37°C                                                                     |
| <b>Substrate:</b>          | 4.0 µM Mca-Pro-Leu-Gly-Leu-Dap-Ala-Arg-NH <sub>2</sub> | <b>Incubation Time/Temp:</b> | 2 hours @ 37°C                                                                        |
| <b>Vehicle:</b>            | 1.00% DMSO                                             | <b>Incubation Buffer:</b>    | 50 mM MOPS, pH 7.2, 10 mM CaCl <sub>2</sub> , 10 µM ZnCl <sub>2</sub> , 0.05% Brij 35 |
| <b>Significance Crit.:</b> | ≥50% of max stimulation or inhibition                  | <b>Quantitation Method:</b>  | Spectrofluorimetric quantitation of Mca-Pro-Leu-Gly                                   |

### ■ 114710 Peptidase, Matrix Metalloproteinase-7 (MMP-7)

|                            |                                                        |                              |                                                                                       |
|----------------------------|--------------------------------------------------------|------------------------------|---------------------------------------------------------------------------------------|
| <b>Source:</b>             | Human recombinant E. coli                              | <b>Pre-Incub. Time/Temp:</b> | 60 minutes @ 37°C                                                                     |
| <b>Substrate:</b>          | 4.0 µM Mca-Pro-Leu-Gly-Leu-Dap-Ala-Arg-NH <sub>2</sub> | <b>Incubation Time/Temp:</b> | 2 hours @ 37°C                                                                        |
| <b>Vehicle:</b>            | 1.00% DMSO                                             | <b>Incubation Buffer:</b>    | 50 mM MOPS, pH 7.2, 10 mM CaCl <sub>2</sub> , 10 µM ZnCl <sub>2</sub> , 0.05% Brij 35 |
| <b>Significance Crit.:</b> | ≥50% of max stimulation or inhibition                  | <b>Quantitation Method:</b>  | Spectrofluorimetric quantitation of Mca-Pro-Leu-Gly                                   |

### ■ 114800 Peptidase, Matrix Metalloproteinase-8 (MMP-8)

|                            |                                                        |                              |                                                                                       |
|----------------------------|--------------------------------------------------------|------------------------------|---------------------------------------------------------------------------------------|
| <b>Source:</b>             | Human neutrophils                                      | <b>Pre-Incub. Time/Temp:</b> | 60 minutes @ 37°C                                                                     |
| <b>Substrate:</b>          | 4.0 µM Mca-Pro-Leu-Gly-Leu-Dap-Ala-Arg-NH <sub>2</sub> | <b>Incubation Time/Temp:</b> | 2 hours @ 37°C                                                                        |
| <b>Vehicle:</b>            | 1.00% DMSO                                             | <b>Incubation Buffer:</b>    | 50 mM MOPS, pH 7.2, 10 mM CaCl <sub>2</sub> , 10 µM ZnCl <sub>2</sub> , 0.05% Brij 35 |
| <b>Significance Crit.:</b> | ≥50% of max stimulation or inhibition                  | <b>Quantitation Method:</b>  | Spectrofluorimetric quantitation of Mca-Pro-Leu-Gly                                   |

### ■ 114910 Peptidase, Matrix Metalloproteinase-9 (MMP-9)

|                            |                                                        |                              |                                                                                       |
|----------------------------|--------------------------------------------------------|------------------------------|---------------------------------------------------------------------------------------|
| <b>Source:</b>             | Human recombinant Mammalian cells                      | <b>Pre-Incub. Time/Temp:</b> | 60 minutes @ 37°C                                                                     |
| <b>Substrate:</b>          | 4.0 µM Mca-Pro-Leu-Gly-Leu-Dap-Ala-Arg-NH <sub>2</sub> | <b>Incubation Time/Temp:</b> | 2 hours @ 37°C                                                                        |
| <b>Vehicle:</b>            | 1.00% DMSO                                             | <b>Incubation Buffer:</b>    | 50 mM MOPS, pH 7.2, 10 mM CaCl <sub>2</sub> , 10 µM ZnCl <sub>2</sub> , 0.05% Brij 35 |
| <b>Significance Crit.:</b> | ≥50% of max stimulation or inhibition                  | <b>Quantitation Method:</b>  | Spectrofluorimetric quantitation of Mca-Pro-Leu-Gly                                   |



## Methods

### ■ 114950 Peptidase, Matrix Metalloproteinase-10 (MMP-10)

|                            |                                                        |                              |                                                                                       |
|----------------------------|--------------------------------------------------------|------------------------------|---------------------------------------------------------------------------------------|
| <b>Source:</b>             | Human recombinant E. coli cells                        | <b>Pre-Incub. Time/Temp:</b> | 60 minutes @ 37°C                                                                     |
| <b>Substrate:</b>          | 4.0 µM Mca-Pro-Leu-Gly-Leu-Dap-Ala-Arg-NH <sub>2</sub> | <b>Incubation Time/Temp:</b> | 2 hours @ 37°C                                                                        |
| <b>Vehicle:</b>            | 1.00% DMSO                                             | <b>Incubation Buffer:</b>    | 50 mM MOPS, pH 7.2, 10 mM CaCl <sub>2</sub> , 10 µM ZnCl <sub>2</sub> , 0.05% Brij 35 |
| <b>Significance Crit.:</b> | ≥50% of max stimulation or inhibition                  | <b>Quantitation Method:</b>  | Spectrofluorimetric quantitation of Mca-Pro-Leu-Gly                                   |

### ■ 115200 Peptidase, Matrix Metalloproteinase-12 (MMP-12)

|                            |                                                        |                              |                                                                                       |
|----------------------------|--------------------------------------------------------|------------------------------|---------------------------------------------------------------------------------------|
| <b>Source:</b>             | Human recombinant E. coli                              | <b>Pre-Incub. Time/Temp:</b> | 60 minutes @ 37°C                                                                     |
| <b>Substrate:</b>          | 4.0 µM Mca-Pro-Leu-Gly-Leu-Dap-Ala-Arg-NH <sub>2</sub> | <b>Incubation Time/Temp:</b> | 2 hours @ 37°C                                                                        |
| <b>Vehicle:</b>            | 1.00% DMSO                                             | <b>Incubation Buffer:</b>    | 50 mM MOPS, pH 7.2, 10 mM CaCl <sub>2</sub> , 10 µM ZnCl <sub>2</sub> , 0.05% Brij 35 |
| <b>Significance Crit.:</b> | ≥50% of max stimulation or inhibition                  | <b>Quantitation Method:</b>  | Spectrofluorimetric quantitation of Mca-Pro-Leu-Gly                                   |

### ■ 115300 Peptidase, Matrix Metalloproteinase-13 (MMP-13)

|                            |                                                        |                              |                                                                                       |
|----------------------------|--------------------------------------------------------|------------------------------|---------------------------------------------------------------------------------------|
| <b>Source:</b>             | Human recombinant insect Sf9 cells                     | <b>Pre-Incub. Time/Temp:</b> | 60 minutes @ 37°C                                                                     |
| <b>Substrate:</b>          | 4.0 µM Mca-Pro-Leu-Gly-Leu-Dap-Ala-Arg-NH <sub>2</sub> | <b>Incubation Time/Temp:</b> | 2 hours @ 37°C                                                                        |
| <b>Vehicle:</b>            | 1.00% DMSO                                             | <b>Incubation Buffer:</b>    | 50 mM MOPS, pH 7.2, 10 mM CaCl <sub>2</sub> , 10 µM ZnCl <sub>2</sub> , 0.05% Brij 35 |
| <b>Significance Crit.:</b> | ≥50% of max stimulation or inhibition                  | <b>Quantitation Method:</b>  | Spectrofluorimetric quantitation of Mca-Pro-Leu-Gly                                   |

### ■ 115400 Peptidase, Matrix Metalloproteinase-14 (MMP-14)

|                            |                                                        |                              |                                                                                       |
|----------------------------|--------------------------------------------------------|------------------------------|---------------------------------------------------------------------------------------|
| <b>Source:</b>             | Human recombinant E. coli                              | <b>Pre-Incub. Time/Temp:</b> | 60 minutes @ 37°C                                                                     |
| <b>Substrate:</b>          | 4.0 µM Mca-Pro-Leu-Gly-Leu-Dap-Ala-Arg-NH <sub>2</sub> | <b>Incubation Time/Temp:</b> | 2 hours @ 37°C                                                                        |
| <b>Vehicle:</b>            | 1.00% DMSO                                             | <b>Incubation Buffer:</b>    | 50 mM MOPS, pH 7.2, 10 mM CaCl <sub>2</sub> , 10 µM ZnCl <sub>2</sub> , 0.05% Brij 35 |
| <b>Significance Crit.:</b> | ≥50% of max stimulation or inhibition                  | <b>Quantitation Method:</b>  | Spectrofluorimetric quantitation of Mca-Pro-Leu-Gly                                   |

### ■ 115450 Peptidase, Matrix Metalloproteinase-15 (MMP-15)

|                            |                                                        |                              |                                                                                       |
|----------------------------|--------------------------------------------------------|------------------------------|---------------------------------------------------------------------------------------|
| <b>Source:</b>             | Human recombinant NS0 cells                            | <b>Pre-Incub. Time/Temp:</b> | 60 minutes @ 37°C                                                                     |
| <b>Substrate:</b>          | 4.0 µM Mca-Pro-Leu-Gly-Leu-Dap-Ala-Arg-NH <sub>2</sub> | <b>Incubation Time/Temp:</b> | 2 hours @ 37°C                                                                        |
| <b>Vehicle:</b>            | 1.00% DMSO                                             | <b>Incubation Buffer:</b>    | 50 mM MOPS, pH 7.2, 10 mM CaCl <sub>2</sub> , 10 µM ZnCl <sub>2</sub> , 0.05% Brij 35 |
| <b>Significance Crit.:</b> | ≥50% of max stimulation or inhibition                  | <b>Quantitation Method:</b>  | Spectrofluorimetric quantitation of Mca-Pro-Leu-Gly                                   |

## Methods

### ■ 115490 Peptidase, Matrix Metalloproteinase-17 (MMP-17)

|                            |                                                        |                              |                                                                                       |
|----------------------------|--------------------------------------------------------|------------------------------|---------------------------------------------------------------------------------------|
| <b>Source:</b>             | Human recombinant NS0 cells                            | <b>Pre-Incub. Time/Temp:</b> | 60 minutes @ 37°C                                                                     |
| <b>Substrate:</b>          | 4.0 µM Mca-Pro-Leu-Gly-Leu-Dap-Ala-Arg-NH <sub>2</sub> | <b>Incubation Time/Temp:</b> | 2 hours @ 37°C                                                                        |
| <b>Vehicle:</b>            | 1.00% DMSO                                             | <b>Incubation Buffer:</b>    | 50 mM MOPS, pH 7.2, 10 mM CaCl <sub>2</sub> , 10 µM ZnCl <sub>2</sub> , 0.05% Brij 35 |
| <b>Significance Crit.:</b> | ≥50% of max stimulation or inhibition                  | <b>Quantitation Method:</b>  | Spectrofluorimetric quantitation of Mca-Pro-Leu-Gly                                   |

### ■ 115510 Peptidase, Matrix Metalloproteinase-19 (MMP-19)

|                            |                                                         |                              |                                                                                       |
|----------------------------|---------------------------------------------------------|------------------------------|---------------------------------------------------------------------------------------|
| <b>Source:</b>             | Human recombinant E. coli cells                         | <b>Pre-Incub. Time/Temp:</b> | 60 minutes @ 37°C                                                                     |
| <b>Substrate:</b>          | 50.0 µM Mca-Pro-Leu-Gly-Leu-Dap-Ala-Arg-NH <sub>2</sub> | <b>Incubation Time/Temp:</b> | 2 hours @ 37°C                                                                        |
| <b>Vehicle:</b>            | 1.00% DMSO                                              | <b>Incubation Buffer:</b>    | 50 mM MOPS, pH 7.2, 10 mM CaCl <sub>2</sub> , 10 µM ZnCl <sub>2</sub> , 0.05% Brij 35 |
| <b>Significance Crit.:</b> | ≥50% of max stimulation or inhibition                   | <b>Quantitation Method:</b>  | Spectrofluorimetric quantitation of Mca-Pro-Leu-Gly                                   |

### ■ 115520 Peptidase, Matrix Metalloproteinase-20 (MMP-20)

|                            |                                                        |                              |                                                                                       |
|----------------------------|--------------------------------------------------------|------------------------------|---------------------------------------------------------------------------------------|
| <b>Source:</b>             | Human recombinant E. coli cells                        | <b>Pre-Incub. Time/Temp:</b> | 60 minutes @ 37°C                                                                     |
| <b>Substrate:</b>          | 4.0 µM Mca-Pro-Leu-Gly-Leu-Dap-Ala-Arg-NH <sub>2</sub> | <b>Incubation Time/Temp:</b> | 2 hours @ 37°C                                                                        |
| <b>Vehicle:</b>            | 1.00% DMSO                                             | <b>Incubation Buffer:</b>    | 50 mM MOPS, pH 7.2, 10 mM CaCl <sub>2</sub> , 10 µM ZnCl <sub>2</sub> , 0.05% Brij 35 |
| <b>Significance Crit.:</b> | ≥50% of max stimulation or inhibition                  | <b>Quantitation Method:</b>  | Spectrofluorimetric quantitation of Mca-Pro-Leu-Gly                                   |

### ■ 115560 Peptidase, Matrix Metalloproteinase-24 (MMP-24)

|                            |                                                        |                              |                                                                                       |
|----------------------------|--------------------------------------------------------|------------------------------|---------------------------------------------------------------------------------------|
| <b>Source:</b>             | Human recombinant E. coli cells                        | <b>Pre-Incub. Time/Temp:</b> | 60 minutes @ 37°C                                                                     |
| <b>Substrate:</b>          | 4.0 µM Mca-Pro-Leu-Gly-Leu-Dap-Ala-Arg-NH <sub>2</sub> | <b>Incubation Time/Temp:</b> | 2 hours @ 37°C                                                                        |
| <b>Vehicle:</b>            | 1.00% DMSO                                             | <b>Incubation Buffer:</b>    | 50 mM MOPS, pH 7.2, 10 mM CaCl <sub>2</sub> , 10 µM ZnCl <sub>2</sub> , 0.05% Brij 35 |
| <b>Significance Crit.:</b> | ≥50% of max stimulation or inhibition                  | <b>Quantitation Method:</b>  | Spectrofluorimetric quantitation of Mca-Pro-Leu-Gly                                   |

### ■ 164010 Peptidase, Metalloproteinase, Neutral Endopeptidase

|                            |                                       |                              |                                                                    |
|----------------------------|---------------------------------------|------------------------------|--------------------------------------------------------------------|
| <b>Source:</b>             | Human recombinant CHO cells           | <b>Pre-Incub. Time/Temp:</b> | 15 minutes @ 25°C                                                  |
| <b>Substrate:</b>          | 10.0 µM Mca-R-P-P-G-F-S-A-F-K(Dnp)-OH | <b>Incubation Time/Temp:</b> | 30 minutes @ 25°C                                                  |
| <b>Vehicle:</b>            | 1.00% DMSO                            | <b>Incubation Buffer:</b>    | 50 mM Tris-HCl, pH 9.0, 0.05 % Brij-35                             |
| <b>Significance Crit.:</b> | ≥50% of max stimulation or inhibition | <b>Quantitation Method:</b>  | Spectrophotometric quantitation of Mca-Arg-Pro-Pro-Gly-Phe-Ser-Ala |

## Methods

### ■ 166500 Peptidase, Tumor Necrosis Factor- $\alpha$ Converting Enzyme (TACE)

---

|                            |                                                            |                              |                                                                       |
|----------------------------|------------------------------------------------------------|------------------------------|-----------------------------------------------------------------------|
| <b>Source:</b>             | Human recombinant insect Sf21 cells                        | <b>Pre-Incub. Time/Temp:</b> | 15 minutes @ 25°C                                                     |
| <b>Substrate:</b>          | 10.0 $\mu$ M Mca-P-L-A-Q-A-V-Dpa-R-S-S-S-R-NH <sub>2</sub> | <b>Incubation Time/Temp:</b> | 30 minutes @ 25°C                                                     |
| <b>Vehicle:</b>            | 1.00% DMSO                                                 | <b>Incubation Buffer:</b>    | 25 mM Tris-HCl, pH 9.0, 2.5 $\mu$ M ZnCl <sub>2</sub> , 0.05% Brij 35 |
| <b>Significance Crit.:</b> | $\geq$ 50% of max stimulation or inhibition                | <b>Quantitation Method:</b>  | Spectrofluorimetric quantitation of Mca-P-L-A-Q-A                     |

## Literature References

**Cat # Reference**

---

- 112250 Barrett AJ (1980)**  
Fluorimetric assays for cathepsin B and cathepsin H with methylcoumarylamide substrates. *Biochem J.* 187: 909 - 912.
- Hulkower KI, Butler CC, Linebaugh BE, Klaus JK, Keppler D, Giranda VL and Sloane BF (2000)**  
Fluorescent microplate assay for cancer cell-associated cathepsin B. *Eur J Biochem.* 267(13): 4165 - 4170.
- 112350 Yasuda Y, Kageyama T, Akamine A, Shibata M, Kominami E, Uchiyama Y and Yamamoto K (1999)**  
Characterization of new fluorogenic substrates for the rapid and sensitive assay of cathepsin E and cathepsin D. *J Biochem.* 125(6): 1137-1143.
- 114110 Johnson LL, Dyer R and Hupe DJ (1998)**  
Matrix metalloproteinases. *Curr Opin Chem Biol.* 2: 466 - 471.
- Knight CG, Willenbrock F and Murphy G (1992)**  
A novel coumarin-labelled peptide for sensitive continuous assays of the matrix metalloproteinases. *FEBS Lett.* 296 (3): 263 - 266.
- 114210 Knight CG, Willenbrock F and Murphy G (1992)**  
A novel coumarin-labelled peptide for sensitive continuous assays of the matrix metalloproteinases. *FEBS Lett.* 296(3): 263 - 266.
- Olson MW, Gervasi DC, Mobashery S and Fridman R (1997)**  
Kinetic analysis of the binding of human matrix metalloproteinase-2 and -9 to tissue inhibitor of metalloproteinase (TIMP)-1 and TIMP-2. *Biol Chem.* 272 (47): 29975 - 29983.
- 114310 Johnson LL, Dyer R and Hupe DJ (1998)**  
Matrix metalloproteinases. *Curr Opin Chem Biol.* 2: 466 - 471.
- Knight CG, Willenbrock F and Murphy G (1992)**  
A novel coumarin-labelled peptide for sensitive continuous assays of the matrix metalloproteinases. *FEBS Lett.* 296(3): 263 - 266.
- 114710 Johnson LL, Dyer R and Hupe DJ (1998)**  
Matrix metalloproteinases. *Curr Opin Chem Biol.* 2: 466 - 471.
- Knight CG, Willenbrock F and Murphy G (1992)**  
A novel coumarin-labelled peptide for sensitive continuous assays of the matrix metalloproteinases. *FEBS Lett.* 296(3): 263 - 266.
- 114800 Johnson LL, Dyer R and Hupe DJ (1998)**  
Matrix metalloproteinases. *Curr Opin Chem Biol.* 2: 466 - 471.
- Knight CG, Willenbrock F and Murphy G (1992)**  
A novel coumarin-labelled peptide for sensitive continuous assays of the matrix metalloproteinases. *FEBS Lett.* 296(3): 263 - 266.
- 114910 Knight CG, Willenbrock F and Murphy G (1992)**  
A novel coumarin-labelled peptide for sensitive continuous assays of the matrix metalloproteinases. *FEBS Lett.* 296(3): 263 - 266.
- Olson MW, Gervasi DC, Mobashery S and Fridman R (1997)**  
Kinetic analysis of the binding of human matrix metalloproteinase-2 and -9 to tissue inhibitor of metalloproteinase (TIMP)-1 and TIMP-2. *J Biol Chem.* 272 (47): 29975 - 29983.
- 114950 Belaouaj AA, Li A, Wun TC, Welgus HG and Shapiro SD (2000)**  
Matrix metalloproteinases cleave tissue factor pathway inhibitor. Effects on coagulation. *J Biol Chem.* 275(35): 27123-27128.

---

Howard Hughes Medical Institute

Study #: TW04-0003166, Compound Code: li1 (1222268)

Thursday, November 08, 2018

Page 12 of 15

## Literature References

### Cat # Reference

- 
- Pittayapruek P, Meephansan J, Prapapan O, Komine M and Ohtsuki M (2016)**  
Role of matrix metalloproteinases in photoaging and photocarcinogenesis. *Int J Mol Sci.* 17(6): 868-887.
- 115200 Belaouaj AA, Li A, Wun TC, Welgus HG and Shapiro SD (2000)**  
Matrix metalloproteinases cleave tissue factor pathway inhibitor. Effects on coagulation. *J Biol Chem.* 275(35): 27123-27128.
- Warner RL, Lewis CS, Beltran L, Younkin EM, Varani and Johnson KJ (2001)**  
The role of metalloelastase in immune complex-induced acute lung injury. *Am J Pathol.* 158(6): 2139-2144.
- 115300 Johnson LL, Dyer R and Hupe DJ (1998)**  
Matrix metalloproteinases. *Curr Opin Chem Biol.* 2: 466 - 471.
- Knight CG, Willenbrock F and Murphy G (1992)**  
A novel coumarin-labelled peptide for sensitive continuous assays of the matrix metalloproteinases. *FEBS Lett.* 296(3): 263 - 266.
- 115400 Johnson LL, Dyer R and Hupe DJ (1998)**  
Matrix metalloproteinases. *Curr Opin Chem Biol.* 2: 466-471.
- Knight CG, Willenbrock F and Murphy G (1992)**  
A novel coumarin-labelled peptide for sensitive continuous assays of the matrix metalloproteinases. *FEBS Lett.* 296(3): 263 - 266.
- 115450 Belaouaj AA, Li A, Wun TC, Welgus HG and Shapiro SD (2000)**  
Matrix metalloproteinases cleave tissue factor pathway inhibitor. Effects on coagulation. *J Biol Chem.* 275(35): 27123-27128.
- Pittayapruek P, Meephansan J, Prapapan O, Komine M and Ohtsuki M (2016)**  
Role of matrix metalloproteinases in photoaging and photocarcinogenesis. *Int J Mol Sci.* 17(6): 868-887.
- 115490 Belaouaj AA, Li A, Wun TC, Welgus HG and Shapiro SD (2000)**  
Matrix metalloproteinases cleave tissue factor pathway inhibitor. Effects on coagulation. *J Biol Chem.* 275(35): 27123-27128.
- Pittayapruek P, Meephansan J, Prapapan O, Komine M and Ohtsuki M (2016)**  
Role of matrix metalloproteinases in photoaging and photocarcinogenesis. *Int J Mol Sci.* 17(6): 868-887.
- 115510 Belaouaj AA, Li A, Wun TC, Welgus HG and Shapiro SD (2000)**  
Matrix metalloproteinases cleave tissue factor pathway inhibitor. Effects on coagulation. *J Biol Chem.* 275(35): 27123-27128.
- Pittayapruek P, Meephansan J, Prapapan O, Komine M and Ohtsuki M (2016)**  
Role of matrix metalloproteinases in photoaging and photocarcinogenesis. *Int J Mol Sci.* 17(6): 868-887.
- 115520 Belaouaj AA, Li A, Wun TC, Welgus HG and Shapiro SD (2000)**  
Matrix metalloproteinases cleave tissue factor pathway inhibitor. Effects on coagulation. *J Biol Chem.* 275(35): 27123-27128.
- Pittayapruek P, Meephansan J, Prapapan O, Komine M and Ohtsuki M (2016)**  
Role of matrix metalloproteinases in photoaging and photocarcinogenesis. *Int J Mol Sci.* 17(6): 868-887.
- 115560 Belaouaj AA, Li A, Wun TC, Welgus HG and Shapiro SD (2000)**  
Matrix metalloproteinases cleave tissue factor pathway inhibitor. Effects on coagulation. *J Biol Chem.* 275(35): 27123-27128.

## Literature References

**Cat # Reference**

- 
- Pittayapruek P, Meephansan J, Prapapan O, Komine M and Ohtsuki M (2016)**  
Role of matrix metalloproteinases in photoaging and photocarcinogenesis. *Int J Mol Sci.* 17(6): 868-887.
- 163950 Russell FD and Davenport AP (1999)**  
Evidence for intracellular endothelin-converting enzyme-2 expression in cultured human vascular endothelial cells. *Circ Res.* 84(8): 891-896.
- Valdenaire O, Lepailleur-Enouf D, Egidy G, Thouard A, Barret A, Vranckx R, Tougard C and Michel JB (1999)**  
A fourth isoform of endothelin-converting enzyme (ECE-1) is generated from an additional promoter molecular cloning and characterization. *Eur J Biochem.* 264(2): 341-349.
- 164010 Erdos EG and Skidgel RA (1989)**  
Neutral endopeptidase 24.11 (enkephalinase) and related regulators of peptide hormones. *FASEB J.* 3:145-151.
- Shipp MA, Vijayaraghavan J, Schmidt EV, Masteller EL, D'Adamio L, Hersh LB and Reinherz EL (1989)**  
Common acute lymphoblastic leukemia antigen (CALLA) is active neutral endopeptidase 24.11 ("enkephalinase"): Direct evidence by cDNA transfection analysis. *Proc Natl Acad Sci USA.* 86:297-301.
- 166500 Amour A, Slocombe PM, Webster A, Butler M, Knight CG, Smith BJ, Stephens PE, Shelley C, Hutton M, Knauper V, Docherty AJ and Murphy G (1998)**  
TNF-alpha converting enzyme (TACE) is inhibited by TIMP-3. *FEBS Lett.* 435(1): 39 - 44.
- 199007 Takasaki K, Iwase M, Nakajima T, Ueno K, Nomoto Y, Nakanishi S and Higo K. (2004)**  
K579, a slow-binding inhibitor of dipeptidyl peptidase, is a long-acting hypoglycemic agent. *Eur. J. Pharmacol.*, 486(3): 335-342.

## Reference Compounds

| Cat #  | Assay Name                                                  | Reference Compound | Historical         |                |                | Concurrent |                    |
|--------|-------------------------------------------------------------|--------------------|--------------------|----------------|----------------|------------|--------------------|
|        |                                                             |                    | IC <sub>50</sub> * | K <sub>i</sub> | n <sub>H</sub> | Batch *    | IC <sub>50</sub> * |
| 112250 | Peptidase, CTSB (Cathepsin B)                               | E-64               | 4.20 nM            |                |                | 429901     | 5.23 nM            |
| 112350 | Peptidase, CTSD (Cathepsin D)                               | Pepstatin A        | 0.93 nM            |                |                | 430131     | 1.38 nM            |
| 199007 | Peptidase, Dipeptidyl Peptidase 4 (DPP4, DPP IV)            | K579               | 3.70 nM            |                |                | 429912     | 7.48 nM            |
| 163950 | Peptidase, Endothelin Converting Enzyme-1 (ECE-1)           | Phosphoramidon     | 4.90 nM            |                |                | 429910     | 12.4 nM            |
| 114110 | Peptidase, Matrix Metalloproteinase-1 (MMP-1)               | GM-6001            | 7.50 nM            |                |                | 430051     | 8.86 nM            |
| 114210 | Peptidase, Matrix Metalloproteinase-2 (MMP-2)               | GM-6001            | 1.20 nM            |                |                | 429904     | 1.60 nM            |
| 114310 | Peptidase, Matrix Metalloproteinase-3 (MMP-3)               | GM-6001            | 0.056 μM           |                |                | 430052     | 0.044 μM           |
| 114710 | Peptidase, Matrix Metalloproteinase-7 (MMP-7)               | GM-6001            | 0.066 μM           |                |                | 429905     | 0.066 μM           |
| 114800 | Peptidase, Matrix Metalloproteinase-8 (MMP-8)               | GM-6001            | 0.86 nM            |                |                | 430053     | 0.69 nM            |
| 114910 | Peptidase, Matrix Metalloproteinase-9 (MMP-9)               | GM-6001            | 0.72 nM            |                |                | 430054     | 0.64 nM            |
| 114950 | Peptidase, Matrix Metalloproteinase-10 (MMP-10)             | GM-6001            | 0.12 μM            |                |                | 430055     | 0.12 μM            |
| 115200 | Peptidase, Matrix Metalloproteinase-12 (MMP-12)             | GM-6001            | 0.80 nM            |                |                | 429906     | 1.05 nM            |
| 115300 | Peptidase, Matrix Metalloproteinase-13 (MMP-13)             | GM-6001            | 2.50 nM            |                |                | 430056     | 1.59 nM            |
| 115400 | Peptidase, Matrix Metalloproteinase-14 (MMP-14)             | GM-6001            | 8.30 nM            |                |                | 430057     | 6.58 nM            |
| 115450 | Peptidase, Matrix Metalloproteinase-15 (MMP-15)             | GM-6001            | 3.40 nM            |                |                | 430058     | 3.14 nM            |
| 115490 | Peptidase, Matrix Metalloproteinase-17 (MMP-17)             | GM-6001            | 13.0 nM            |                |                | 430061     | 0.023 μM           |
| 115510 | Peptidase, Matrix Metalloproteinase-19 (MMP-19)             | GM-6001            | 0.11 μM            |                |                | 430062     | 0.11 μM            |
| 115520 | Peptidase, Matrix Metalloproteinase-20 (MMP-20)             | GM-6001            | 8.80 nM            |                |                | 430059     | 3.41 nM            |
| 115560 | Peptidase, Matrix Metalloproteinase-24 (MMP-24)             | GM-6001            | 2.70 nM            |                |                | 430060     | 1.40 nM            |
| 164010 | Peptidase, Metalloproteinase, Neutral Endopeptidase         | Phosphoramidon     | 1.60 μM            |                |                | 429911     | 0.83 μM            |
| 166500 | Peptidase, Tumor Necrosis Factor-α Converting Enzyme (TACE) | GM-6001            | 0.021 μM           |                |                | 430142     | 0.042 μM           |

\* Batch: Represents compounds tested concurrently in the same assay(s).

Howard Hughes Medical Institute

Study #: TW04-0003166, Compound Code: li1 (1222268)

Thursday, November 08, 2018

Page 15 of 15

## Data Report for Pharmacology Services

### Howard Hughes Medical Institute

4000 Jones Bridge Rd, Chevy Chase, MD 20815, United States

**Study #:** TW04-0003166

**Quote #:** TW04-0003166-Q07

**Client Study #:**

**Study Date:** Oct 25, 2018 - Nov 08, 2018

**PO #:**

### Compound Information

---

**Panlabs Code:** HHMI-4

**Panlabs #:** 1222269

**Alt. Code 1:** JP43

**Alt. Code 2:**

**Alt. Code 3:**

**M.W.:** 494.654

### Eurofins Panlabs Discovery Services Taiwan, Ltd.

158 Li-Teh Road, Peitou

Taipei Taiwan R.O.C. 11259

Tel: + 886-2-2898-7888 • Fax: +886-2-2894-8267 • e-mail:

*Cerep and Eurofins Panlabs are two companies of the Eurofins Group*

---

Howard Hughes Medical Institute

Study #: TW04-0003166, Compound Code: JP43 (1222269)

Thursday, November 08, 2018

Page 1 of 16



### Services Performed

Individual Tests (Total # of Assays: 21)

### Study Objectives

To evaluate, in Enzyme assays, the activity of test compound JP43 (Panlabs # 1222269).

### Study Signatures

---



---

Chi-Ling Teng, M.A.

Study Director for Enzyme Assays

"This study was conducted according to the procedures described in this report. All data presented are authentic, accurate and correct to the best of our knowledge."

---

## Table of Contents

| Report Section                 | Page |
|--------------------------------|------|
| Cover Page                     | 1    |
| Study Signatures               | 2    |
| Table of Contents              | 3    |
| Summary                        | 4    |
| Summary of Significant Results | 5    |
| Experimental Results           | 6    |
| Methods                        | 8    |
| Literature References          | 13   |
| Reference Compounds            | 16   |

---

## Summary

### STUDY OBJECTIVE

To evaluate, in Enzyme assays, the activity of compound JP43 (HHMI-4, PT# 1222269).

### METHODS

Methods employed in this study have been adapted from the scientific literature to maximize reliability and reproducibility. Reference standards were run as an integral part of each assay to ensure the validity of the results obtained. Assays were performed under conditions described in the accompanying "Methods" section of this report.

Where presented,  $IC_{50}$  values were determined by a non-linear, least squares regression analysis using MathIQ™ (ID Business Solutions Ltd., UK). Where inhibition constants ( $K_i$ ) are presented, the  $K_i$  values were calculated using the equation of Cheng and Prusoff (Cheng, Y., Prusoff, W.H., *Biochem. Pharmacol.* **22**:3099-3108, 1973) using the observed  $IC_{50}$  of the tested compound, the concentration of radioligand employed in the assay, and the historical values for the  $K_D$  of the ligand (obtained experimentally at **Eurofins Panlabs, Inc.**). Where presented, the Hill coefficient ( $n_H$ ), defining the slope of the competitive binding curve, was calculated using MathIQ™. Hill coefficients significantly different than 1.0, may suggest that the binding displacement does not follow the laws of mass action with a single binding site. Where  $IC_{50}$ ,  $K_i$ , and/or  $n_H$  data are presented without Standard Error of the Mean (SEM), data are insufficient to be quantitative, and the values presented ( $K_i$ ,  $IC_{50}$ ,  $n_H$ ) should be interpreted with caution.

### RESULTS

A summary of results meeting the significance criteria is presented in the following sections. Complete results are presented under the section labeled "Experimental Results". Individual responses, if requested, are presented in the section labeled "Individual Responses".

### SUMMARY/CONCLUSION

Significant results are displayed in the following table(s) in rank order of potency for estimated  $IC_{50}$  and/or  $K_i$  values.

---

## Summary of Significant Results

Biochemical assay results are presented as the percent inhibition of specific binding or activity throughout the report. All other results are expressed in terms of that assay's quantitation method.

- For primary assays, only the lowest concentration with a significant response judged by the assays' criteria, is shown in this summary.
- Where applicable, either the secondary assay results with the lowest dose/concentration meeting the significance criteria or, if inactive, the highest dose/concentration that did not meet the significance criteria is shown.
- Unless otherwise requested, primary screening in duplicate with quantitative data (e.g.,  $IC_{50} \pm SEM$ ,  $K_i \pm SEM$  and  $n_H$ ) are shown where applicable for individual requested assays. In screening packages, primary screening in duplicate with semi-quantitative data (e.g., estimated  $IC_{50}$ ,  $K_i$  and  $n_H$ ) are shown where applicable (concentration range of 4 log units); available secondary functional assays are carried out (30 mM) and MEC or MIC determined only if active in primary assays >50% at 1 log unit below initial test concentration.

Significant responses ( $\geq 50\%$  inhibition or stimulation for Biochemical assays) were noted in the primary assays listed below:

---

*No significant results noted.*

## Experimental Results

| Cat #                                | Assay Name                                        | Batch* | Spec. | Rep. | Conc. | % Inh. | IC <sub>50</sub> * | K <sub>i</sub> | n <sub>H</sub> | R |
|--------------------------------------|---------------------------------------------------|--------|-------|------|-------|--------|--------------------|----------------|----------------|---|
| <b>Compound: JP43, PT #: 1222269</b> |                                                   |        |       |      |       |        |                    |                |                |   |
| 112250                               | Peptidase, CTSB (Cathepsin B)                     | 429901 | hum   | 1    | 10 µM | 3      |                    |                |                |   |
|                                      |                                                   |        | hum   | 1    | 1 µM  | 1      |                    |                |                |   |
| 112350                               | Peptidase, CTSD (Cathepsin D)                     | 430131 | hum   | 1    | 10 µM | 0      |                    |                |                |   |
|                                      |                                                   |        | hum   | 1    | 1 µM  | -1     |                    |                |                |   |
| 199007                               | Peptidase, Dipeptidyl Peptidase 4 (DPP4, DPP IV)  | 429912 | hum   | 1    | 10 µM | -6     |                    |                |                |   |
|                                      |                                                   |        | hum   | 1    | 1 µM  | -2     |                    |                |                |   |
| 163950                               | Peptidase, Endothelin Converting Enzyme-1 (ECE-1) | 429910 | hum   | 1    | 10 µM | 5      |                    |                |                |   |
|                                      |                                                   |        | hum   | 1    | 1 µM  | 2      |                    |                |                |   |
| 114110                               | Peptidase, Matrix Metalloproteinase-1 (MMP-1)     | 430051 | hum   | 1    | 10 µM | 1      |                    |                |                |   |
|                                      |                                                   |        | hum   | 1    | 1 µM  | -1     |                    |                |                |   |
| 114210                               | Peptidase, Matrix Metalloproteinase-2 (MMP-2)     | 429904 | hum   | 1    | 10 µM | 5      |                    |                |                |   |
|                                      |                                                   |        | hum   | 1    | 1 µM  | 1      |                    |                |                |   |
| 114310                               | Peptidase, Matrix Metalloproteinase-3 (MMP-3)     | 430052 | hum   | 1    | 10 µM | 1      |                    |                |                |   |
|                                      |                                                   |        | hum   | 1    | 1 µM  | 1      |                    |                |                |   |
| 114710                               | Peptidase, Matrix Metalloproteinase-7 (MMP-7)     | 429905 | hum   | 1    | 10 µM | 1      |                    |                |                |   |
|                                      |                                                   |        | hum   | 1    | 1 µM  | -1     |                    |                |                |   |
| 114800                               | Peptidase, Matrix Metalloproteinase-8 (MMP-8)     | 430053 | hum   | 1    | 10 µM | -3     |                    |                |                |   |
|                                      |                                                   |        | hum   | 1    | 1 µM  | -1     |                    |                |                |   |
| 114910                               | Peptidase, Matrix Metalloproteinase-9 (MMP-9)     | 430054 | hum   | 1    | 10 µM | -18    |                    |                |                |   |
|                                      |                                                   |        | hum   | 1    | 1 µM  | -10    |                    |                |                |   |
| 114950                               | Peptidase, Matrix Metalloproteinase-10 (MMP-10)   | 430055 | hum   | 1    | 10 µM | 5      |                    |                |                |   |
|                                      |                                                   |        | hum   | 1    | 1 µM  | 0      |                    |                |                |   |
| 115200                               | Peptidase, Matrix Metalloproteinase-12 (MMP-12)   | 429906 | hum   | 1    | 10 µM | 6      |                    |                |                |   |
|                                      |                                                   |        | hum   | 1    | 1 µM  | 6      |                    |                |                |   |
| 115300                               | Peptidase, Matrix Metalloproteinase-13 (MMP-13)   | 430056 | hum   | 1    | 10 µM | 6      |                    |                |                |   |
|                                      |                                                   |        | hum   | 1    | 1 µM  | 3      |                    |                |                |   |
| 115400                               | Peptidase, Matrix Metalloproteinase-14 (MMP-14)   | 430057 | hum   | 1    | 10 µM | 2      |                    |                |                |   |
|                                      |                                                   |        | hum   | 1    | 1 µM  | 1      |                    |                |                |   |

Note: Items meeting criteria for significance (≥50% stimulation or inhibition) are highlighted.

\* Batch: Represents compounds tested concurrently in the same assay(s).

hum=Human

Howard Hughes Medical Institute

Study #: TW04-0003166, Compound Code: JP43 (1222269)

Thursday, November 08, 2018

Page 6 of 16

## Experimental Results

| Cat #  | Assay Name                                                  | Batch* | Spec. | Rep. | Conc. | % Inh. | IC <sub>50</sub> * | K <sub>i</sub> | n <sub>H</sub> | R |
|--------|-------------------------------------------------------------|--------|-------|------|-------|--------|--------------------|----------------|----------------|---|
| 115450 | Peptidase, Matrix Metalloproteinase-15 (MMP-15)             | 430058 | hum   | 1    | 10 µM | -4     |                    |                |                |   |
|        |                                                             |        | hum   | 1    | 1 µM  | -5     |                    |                |                |   |
| 115490 | Peptidase, Matrix Metalloproteinase-17 (MMP-17)             | 430061 | hum   | 1    | 10 µM | 0      |                    |                |                |   |
|        |                                                             |        | hum   | 1    | 1 µM  | -1     |                    |                |                |   |
| 115510 | Peptidase, Matrix Metalloproteinase-19 (MMP-19)             | 430062 | hum   | 1    | 10 µM | 4      |                    |                |                |   |
|        |                                                             |        | hum   | 1    | 1 µM  | -2     |                    |                |                |   |
| 115520 | Peptidase, Matrix Metalloproteinase-20 (MMP-20)             | 430059 | hum   | 1    | 10 µM | 3      |                    |                |                |   |
|        |                                                             |        | hum   | 1    | 1 µM  | 1      |                    |                |                |   |
| 115560 | Peptidase, Matrix Metalloproteinase-24 (MMP-24)             | 430060 | hum   | 1    | 10 µM | 30     |                    |                |                |   |
|        |                                                             |        | hum   | 1    | 1 µM  | -8     |                    |                |                |   |
| 164010 | Peptidase, Metalloproteinase, Neutral Endopeptidase         | 429911 | hum   | 1    | 10 µM | -13    |                    |                |                |   |
|        |                                                             |        | hum   | 1    | 1 µM  | -10    |                    |                |                |   |
| 166500 | Peptidase, Tumor Necrosis Factor-α Converting Enzyme (TACE) | 430142 | hum   | 1    | 10 µM | 8      |                    |                |                |   |
|        |                                                             |        | hum   | 1    | 1 µM  | 1      |                    |                |                |   |

Note: Items meeting criteria for significance (≥50% stimulation or inhibition) are highlighted.

\* Batch: Represents compounds tested concurrently in the same assay(s).

hum=Human

## Methods

### ■ 112250 Peptidase, CTSB (Cathepsin B)

|                            |                                       |                              |                                                          |
|----------------------------|---------------------------------------|------------------------------|----------------------------------------------------------|
| <b>Source:</b>             | Human liver                           | <b>Pre-Incub. Time/Temp:</b> | 15 minutes @ 25°C                                        |
| <b>Substrate:</b>          | 20.0 µM Boc-Leu-Arg-Arg-AMC           | <b>Incubation Time/Temp:</b> | 30 minutes @ 25°C                                        |
| <b>Vehicle:</b>            | 1.00% DMSO                            | <b>Incubation Buffer:</b>    | 50 mM CH <sub>3</sub> COONa, pH 5.5, 1 mM DTT, 2 mM EDTA |
| <b>Significance Crit.:</b> | ≥50% of max stimulation or inhibition |                              |                                                          |
|                            |                                       | <b>Quantitation Method:</b>  | Spectrofluorimetric quantitation of AMC                  |

### ■ 112350 Peptidase, CTSD (Cathepsin D)

|                            |                                                                                  |                              |                                                                   |
|----------------------------|----------------------------------------------------------------------------------|------------------------------|-------------------------------------------------------------------|
| <b>Source:</b>             | Human liver                                                                      | <b>Pre-Incub. Time/Temp:</b> | 15 minutes @ 37°C                                                 |
| <b>Substrate:</b>          | 20.0 µM MOCAC-Gly-Lys-Pro-Ile-Leu-Phe-Phe-Arg-Leu-Lys(Dnp)-D-Arg-NH <sub>2</sub> | <b>Incubation Time/Temp:</b> | 10 minutes @ 37°C                                                 |
| <b>Vehicle:</b>            | 1.00% DMSO                                                                       | <b>Incubation Buffer:</b>    | 50 mM CH <sub>3</sub> COONa, pH 4.0                               |
| <b>Significance Crit.:</b> | ≥50% of max stimulation or inhibition                                            |                              |                                                                   |
|                            |                                                                                  | <b>Quantitation Method:</b>  | Spectrofluorimetric quantitation of MOCAC-Gly-Lys-Pro-Ile-Leu-Phe |

### ■ 199007 Peptidase, Dipeptidyl Peptidase 4 (DPP4, DPP IV)

|                            |                                      |                              |                                                          |
|----------------------------|--------------------------------------|------------------------------|----------------------------------------------------------|
| <b>Source:</b>             | Human recombinant insect cells       | <b>Pre-Incub. Time/Temp:</b> | 10 minutes @ 25°C                                        |
| <b>Substrate:</b>          | 40.0 µM GP-AMC                       | <b>Incubation Time/Temp:</b> | 10 minutes @ 25°C                                        |
| <b>Vehicle:</b>            | 1.00% DMSO                           | <b>Incubation Buffer:</b>    | 50 mM Tris-HCl, pH 7.4                                   |
| <b>Significance Crit.:</b> | ≥50 of max stimulation or inhibition |                              |                                                          |
|                            |                                      | <b>Quantitation Method:</b>  | Spectrofluorimetric quantitation of aminomethyl coumarin |

### ■ 163950 Peptidase, Endothelin Converting Enzyme-1 (ECE-1)

|                            |                                                      |                              |                                                                     |
|----------------------------|------------------------------------------------------|------------------------------|---------------------------------------------------------------------|
| <b>Source:</b>             | Human recombinant NS0 cells                          | <b>Pre-Incub. Time/Temp:</b> | 15 minutes @ 25°C                                                   |
| <b>Substrate:</b>          | 10.0 µM Mca-Arg-Pro-Pro-Gly-Phe-Ser-Ala-Phe-Lys(Dnp) | <b>Incubation Time/Temp:</b> | 60 minutes @ 25°C                                                   |
| <b>Vehicle:</b>            | 1.00% DMSO                                           | <b>Incubation Buffer:</b>    | 100 mM NaCl, 100 mM MES, pH 6.0                                     |
| <b>Significance Crit.:</b> | ≥50% of max stimulation or inhibition                |                              |                                                                     |
|                            |                                                      | <b>Quantitation Method:</b>  | Spectrofluorimetric quantitation of Mca-Arg-Pro-Pro-Gly-Phe-Ser-Ala |

### ■ 114110 Peptidase, Matrix Metalloproteinase-1 (MMP-1)

|                            |                                                        |                              |                                                                                       |
|----------------------------|--------------------------------------------------------|------------------------------|---------------------------------------------------------------------------------------|
| <b>Source:</b>             | Human rheumatoid synovial fibroblast                   | <b>Pre-Incub. Time/Temp:</b> | 60 minutes @ 37°C                                                                     |
| <b>Substrate:</b>          | 4.0 µM Mca-Pro-Leu-Gly-Leu-Dap-Ala-Arg-NH <sub>2</sub> | <b>Incubation Time/Temp:</b> | 2 hours @ 37°C                                                                        |
| <b>Vehicle:</b>            | 1.00% DMSO                                             | <b>Incubation Buffer:</b>    | 50 mM MOPS, pH 7.2, 10 mM CaCl <sub>2</sub> , 10 µM ZnCl <sub>2</sub> , 0.05% Brij 35 |
| <b>Significance Crit.:</b> | ≥50% of max stimulation or inhibition                  |                              |                                                                                       |
|                            |                                                        | <b>Quantitation Method:</b>  | Spectrofluorimetric quantitation of Mca-Pro-Leu-Gly                                   |

## Methods

### ■ 114210 Peptidase, Matrix Metalloproteinase-2 (MMP-2)

|                            |                                                        |                              |                                                                                       |
|----------------------------|--------------------------------------------------------|------------------------------|---------------------------------------------------------------------------------------|
| <b>Source:</b>             | Human recombinant CHO cells                            | <b>Pre-Incub. Time/Temp:</b> | 60 minutes @ 37°C                                                                     |
| <b>Substrate:</b>          | 4.0 µM Mca-Pro-Leu-Gly-Leu-Dap-Ala-Arg-NH <sub>2</sub> | <b>Incubation Time/Temp:</b> | 2 hours @ 37°C                                                                        |
| <b>Vehicle:</b>            | 1.00% DMSO                                             | <b>Incubation Buffer:</b>    | 50 mM MOPS, pH 7.2, 10 mM CaCl <sub>2</sub> , 10 µM ZnCl <sub>2</sub> , 0.05% Brij 35 |
| <b>Significance Crit.:</b> | ≥50% of max stimulation or inhibition                  | <b>Quantitation Method:</b>  | Spectrofluorimetric quantitation of Mca-Pro-Leu-Gly                                   |

### ■ 114310 Peptidase, Matrix Metalloproteinase-3 (MMP-3)

|                            |                                                        |                              |                                                                                       |
|----------------------------|--------------------------------------------------------|------------------------------|---------------------------------------------------------------------------------------|
| <b>Source:</b>             | Human recombinant E. coli                              | <b>Pre-Incub. Time/Temp:</b> | 60 minutes @ 37°C                                                                     |
| <b>Substrate:</b>          | 4.0 µM Mca-Pro-Leu-Gly-Leu-Dap-Ala-Arg-NH <sub>2</sub> | <b>Incubation Time/Temp:</b> | 2 hours @ 37°C                                                                        |
| <b>Vehicle:</b>            | 1.00% DMSO                                             | <b>Incubation Buffer:</b>    | 50 mM MOPS, pH 7.2, 10 mM CaCl <sub>2</sub> , 10 µM ZnCl <sub>2</sub> , 0.05% Brij 35 |
| <b>Significance Crit.:</b> | ≥50% of max stimulation or inhibition                  | <b>Quantitation Method:</b>  | Spectrofluorimetric quantitation of Mca-Pro-Leu-Gly                                   |

### ■ 114710 Peptidase, Matrix Metalloproteinase-7 (MMP-7)

|                            |                                                        |                              |                                                                                       |
|----------------------------|--------------------------------------------------------|------------------------------|---------------------------------------------------------------------------------------|
| <b>Source:</b>             | Human recombinant E. coli                              | <b>Pre-Incub. Time/Temp:</b> | 60 minutes @ 37°C                                                                     |
| <b>Substrate:</b>          | 4.0 µM Mca-Pro-Leu-Gly-Leu-Dap-Ala-Arg-NH <sub>2</sub> | <b>Incubation Time/Temp:</b> | 2 hours @ 37°C                                                                        |
| <b>Vehicle:</b>            | 1.00% DMSO                                             | <b>Incubation Buffer:</b>    | 50 mM MOPS, pH 7.2, 10 mM CaCl <sub>2</sub> , 10 µM ZnCl <sub>2</sub> , 0.05% Brij 35 |
| <b>Significance Crit.:</b> | ≥50% of max stimulation or inhibition                  | <b>Quantitation Method:</b>  | Spectrofluorimetric quantitation of Mca-Pro-Leu-Gly                                   |

### ■ 114800 Peptidase, Matrix Metalloproteinase-8 (MMP-8)

|                            |                                                        |                              |                                                                                       |
|----------------------------|--------------------------------------------------------|------------------------------|---------------------------------------------------------------------------------------|
| <b>Source:</b>             | Human neutrophils                                      | <b>Pre-Incub. Time/Temp:</b> | 60 minutes @ 37°C                                                                     |
| <b>Substrate:</b>          | 4.0 µM Mca-Pro-Leu-Gly-Leu-Dap-Ala-Arg-NH <sub>2</sub> | <b>Incubation Time/Temp:</b> | 2 hours @ 37°C                                                                        |
| <b>Vehicle:</b>            | 1.00% DMSO                                             | <b>Incubation Buffer:</b>    | 50 mM MOPS, pH 7.2, 10 mM CaCl <sub>2</sub> , 10 µM ZnCl <sub>2</sub> , 0.05% Brij 35 |
| <b>Significance Crit.:</b> | ≥50% of max stimulation or inhibition                  | <b>Quantitation Method:</b>  | Spectrofluorimetric quantitation of Mca-Pro-Leu-Gly                                   |

### ■ 114910 Peptidase, Matrix Metalloproteinase-9 (MMP-9)

|                            |                                                        |                              |                                                                                       |
|----------------------------|--------------------------------------------------------|------------------------------|---------------------------------------------------------------------------------------|
| <b>Source:</b>             | Human recombinant Mammalian cells                      | <b>Pre-Incub. Time/Temp:</b> | 60 minutes @ 37°C                                                                     |
| <b>Substrate:</b>          | 4.0 µM Mca-Pro-Leu-Gly-Leu-Dap-Ala-Arg-NH <sub>2</sub> | <b>Incubation Time/Temp:</b> | 2 hours @ 37°C                                                                        |
| <b>Vehicle:</b>            | 1.00% DMSO                                             | <b>Incubation Buffer:</b>    | 50 mM MOPS, pH 7.2, 10 mM CaCl <sub>2</sub> , 10 µM ZnCl <sub>2</sub> , 0.05% Brij 35 |
| <b>Significance Crit.:</b> | ≥50% of max stimulation or inhibition                  | <b>Quantitation Method:</b>  | Spectrofluorimetric quantitation of Mca-Pro-Leu-Gly                                   |



## Methods

### ■ 114950 Peptidase, Matrix Metalloproteinase-10 (MMP-10)

|                            |                                                        |                              |                                                                                       |
|----------------------------|--------------------------------------------------------|------------------------------|---------------------------------------------------------------------------------------|
| <b>Source:</b>             | Human recombinant E. coli cells                        | <b>Pre-Incub. Time/Temp:</b> | 60 minutes @ 37°C                                                                     |
| <b>Substrate:</b>          | 4.0 µM Mca-Pro-Leu-Gly-Leu-Dap-Ala-Arg-NH <sub>2</sub> | <b>Incubation Time/Temp:</b> | 2 hours @ 37°C                                                                        |
| <b>Vehicle:</b>            | 1.00% DMSO                                             | <b>Incubation Buffer:</b>    | 50 mM MOPS, pH 7.2, 10 mM CaCl <sub>2</sub> , 10 µM ZnCl <sub>2</sub> , 0.05% Brij 35 |
| <b>Significance Crit.:</b> | ≥50% of max stimulation or inhibition                  | <b>Quantitation Method:</b>  | Spectrofluorimetric quantitation of Mca-Pro-Leu-Gly                                   |

### ■ 115200 Peptidase, Matrix Metalloproteinase-12 (MMP-12)

|                            |                                                        |                              |                                                                                       |
|----------------------------|--------------------------------------------------------|------------------------------|---------------------------------------------------------------------------------------|
| <b>Source:</b>             | Human recombinant E. coli                              | <b>Pre-Incub. Time/Temp:</b> | 60 minutes @ 37°C                                                                     |
| <b>Substrate:</b>          | 4.0 µM Mca-Pro-Leu-Gly-Leu-Dap-Ala-Arg-NH <sub>2</sub> | <b>Incubation Time/Temp:</b> | 2 hours @ 37°C                                                                        |
| <b>Vehicle:</b>            | 1.00% DMSO                                             | <b>Incubation Buffer:</b>    | 50 mM MOPS, pH 7.2, 10 mM CaCl <sub>2</sub> , 10 µM ZnCl <sub>2</sub> , 0.05% Brij 35 |
| <b>Significance Crit.:</b> | ≥50% of max stimulation or inhibition                  | <b>Quantitation Method:</b>  | Spectrofluorimetric quantitation of Mca-Pro-Leu-Gly                                   |

### ■ 115300 Peptidase, Matrix Metalloproteinase-13 (MMP-13)

|                            |                                                        |                              |                                                                                       |
|----------------------------|--------------------------------------------------------|------------------------------|---------------------------------------------------------------------------------------|
| <b>Source:</b>             | Human recombinant insect Sf9 cells                     | <b>Pre-Incub. Time/Temp:</b> | 60 minutes @ 37°C                                                                     |
| <b>Substrate:</b>          | 4.0 µM Mca-Pro-Leu-Gly-Leu-Dap-Ala-Arg-NH <sub>2</sub> | <b>Incubation Time/Temp:</b> | 2 hours @ 37°C                                                                        |
| <b>Vehicle:</b>            | 1.00% DMSO                                             | <b>Incubation Buffer:</b>    | 50 mM MOPS, pH 7.2, 10 mM CaCl <sub>2</sub> , 10 µM ZnCl <sub>2</sub> , 0.05% Brij 35 |
| <b>Significance Crit.:</b> | ≥50% of max stimulation or inhibition                  | <b>Quantitation Method:</b>  | Spectrofluorimetric quantitation of Mca-Pro-Leu-Gly                                   |

### ■ 115400 Peptidase, Matrix Metalloproteinase-14 (MMP-14)

|                            |                                                        |                              |                                                                                       |
|----------------------------|--------------------------------------------------------|------------------------------|---------------------------------------------------------------------------------------|
| <b>Source:</b>             | Human recombinant E. coli                              | <b>Pre-Incub. Time/Temp:</b> | 60 minutes @ 37°C                                                                     |
| <b>Substrate:</b>          | 4.0 µM Mca-Pro-Leu-Gly-Leu-Dap-Ala-Arg-NH <sub>2</sub> | <b>Incubation Time/Temp:</b> | 2 hours @ 37°C                                                                        |
| <b>Vehicle:</b>            | 1.00% DMSO                                             | <b>Incubation Buffer:</b>    | 50 mM MOPS, pH 7.2, 10 mM CaCl <sub>2</sub> , 10 µM ZnCl <sub>2</sub> , 0.05% Brij 35 |
| <b>Significance Crit.:</b> | ≥50% of max stimulation or inhibition                  | <b>Quantitation Method:</b>  | Spectrofluorimetric quantitation of Mca-Pro-Leu-Gly                                   |

### ■ 115450 Peptidase, Matrix Metalloproteinase-15 (MMP-15)

|                            |                                                        |                              |                                                                                       |
|----------------------------|--------------------------------------------------------|------------------------------|---------------------------------------------------------------------------------------|
| <b>Source:</b>             | Human recombinant NS0 cells                            | <b>Pre-Incub. Time/Temp:</b> | 60 minutes @ 37°C                                                                     |
| <b>Substrate:</b>          | 4.0 µM Mca-Pro-Leu-Gly-Leu-Dap-Ala-Arg-NH <sub>2</sub> | <b>Incubation Time/Temp:</b> | 2 hours @ 37°C                                                                        |
| <b>Vehicle:</b>            | 1.00% DMSO                                             | <b>Incubation Buffer:</b>    | 50 mM MOPS, pH 7.2, 10 mM CaCl <sub>2</sub> , 10 µM ZnCl <sub>2</sub> , 0.05% Brij 35 |
| <b>Significance Crit.:</b> | ≥50% of max stimulation or inhibition                  | <b>Quantitation Method:</b>  | Spectrofluorimetric quantitation of Mca-Pro-Leu-Gly                                   |

## Methods

### ■ 115490 Peptidase, Matrix Metalloproteinase-17 (MMP-17)

|                            |                                                        |                              |                                                                                       |
|----------------------------|--------------------------------------------------------|------------------------------|---------------------------------------------------------------------------------------|
| <b>Source:</b>             | Human recombinant NS0 cells                            | <b>Pre-Incub. Time/Temp:</b> | 60 minutes @ 37°C                                                                     |
| <b>Substrate:</b>          | 4.0 µM Mca-Pro-Leu-Gly-Leu-Dap-Ala-Arg-NH <sub>2</sub> | <b>Incubation Time/Temp:</b> | 2 hours @ 37°C                                                                        |
| <b>Vehicle:</b>            | 1.00% DMSO                                             | <b>Incubation Buffer:</b>    | 50 mM MOPS, pH 7.2, 10 mM CaCl <sub>2</sub> , 10 µM ZnCl <sub>2</sub> , 0.05% Brij 35 |
| <b>Significance Crit.:</b> | ≥50% of max stimulation or inhibition                  | <b>Quantitation Method:</b>  | Spectrofluorimetric quantitation of Mca-Pro-Leu-Gly                                   |

### ■ 115510 Peptidase, Matrix Metalloproteinase-19 (MMP-19)

|                            |                                                         |                              |                                                                                       |
|----------------------------|---------------------------------------------------------|------------------------------|---------------------------------------------------------------------------------------|
| <b>Source:</b>             | Human recombinant E. coli cells                         | <b>Pre-Incub. Time/Temp:</b> | 60 minutes @ 37°C                                                                     |
| <b>Substrate:</b>          | 50.0 µM Mca-Pro-Leu-Gly-Leu-Dap-Ala-Arg-NH <sub>2</sub> | <b>Incubation Time/Temp:</b> | 2 hours @ 37°C                                                                        |
| <b>Vehicle:</b>            | 1.00% DMSO                                              | <b>Incubation Buffer:</b>    | 50 mM MOPS, pH 7.2, 10 mM CaCl <sub>2</sub> , 10 µM ZnCl <sub>2</sub> , 0.05% Brij 35 |
| <b>Significance Crit.:</b> | ≥50% of max stimulation or inhibition                   | <b>Quantitation Method:</b>  | Spectrofluorimetric quantitation of Mca-Pro-Leu-Gly                                   |

### ■ 115520 Peptidase, Matrix Metalloproteinase-20 (MMP-20)

|                            |                                                        |                              |                                                                                       |
|----------------------------|--------------------------------------------------------|------------------------------|---------------------------------------------------------------------------------------|
| <b>Source:</b>             | Human recombinant E. coli cells                        | <b>Pre-Incub. Time/Temp:</b> | 60 minutes @ 37°C                                                                     |
| <b>Substrate:</b>          | 4.0 µM Mca-Pro-Leu-Gly-Leu-Dap-Ala-Arg-NH <sub>2</sub> | <b>Incubation Time/Temp:</b> | 2 hours @ 37°C                                                                        |
| <b>Vehicle:</b>            | 1.00% DMSO                                             | <b>Incubation Buffer:</b>    | 50 mM MOPS, pH 7.2, 10 mM CaCl <sub>2</sub> , 10 µM ZnCl <sub>2</sub> , 0.05% Brij 35 |
| <b>Significance Crit.:</b> | ≥50% of max stimulation or inhibition                  | <b>Quantitation Method:</b>  | Spectrofluorimetric quantitation of Mca-Pro-Leu-Gly                                   |

### ■ 115560 Peptidase, Matrix Metalloproteinase-24 (MMP-24)

|                            |                                                        |                              |                                                                                       |
|----------------------------|--------------------------------------------------------|------------------------------|---------------------------------------------------------------------------------------|
| <b>Source:</b>             | Human recombinant E. coli cells                        | <b>Pre-Incub. Time/Temp:</b> | 60 minutes @ 37°C                                                                     |
| <b>Substrate:</b>          | 4.0 µM Mca-Pro-Leu-Gly-Leu-Dap-Ala-Arg-NH <sub>2</sub> | <b>Incubation Time/Temp:</b> | 2 hours @ 37°C                                                                        |
| <b>Vehicle:</b>            | 1.00% DMSO                                             | <b>Incubation Buffer:</b>    | 50 mM MOPS, pH 7.2, 10 mM CaCl <sub>2</sub> , 10 µM ZnCl <sub>2</sub> , 0.05% Brij 35 |
| <b>Significance Crit.:</b> | ≥50% of max stimulation or inhibition                  | <b>Quantitation Method:</b>  | Spectrofluorimetric quantitation of Mca-Pro-Leu-Gly                                   |

### ■ 164010 Peptidase, Metalloproteinase, Neutral Endopeptidase

|                            |                                       |                              |                                                                    |
|----------------------------|---------------------------------------|------------------------------|--------------------------------------------------------------------|
| <b>Source:</b>             | Human recombinant CHO cells           | <b>Pre-Incub. Time/Temp:</b> | 15 minutes @ 25°C                                                  |
| <b>Substrate:</b>          | 10.0 µM Mca-R-P-P-G-F-S-A-F-K(Dnp)-OH | <b>Incubation Time/Temp:</b> | 30 minutes @ 25°C                                                  |
| <b>Vehicle:</b>            | 1.00% DMSO                            | <b>Incubation Buffer:</b>    | 50 mM Tris-HCl, pH 9.0, 0.05 % Brij-35                             |
| <b>Significance Crit.:</b> | ≥50% of max stimulation or inhibition | <b>Quantitation Method:</b>  | Spectrophotometric quantitation of Mca-Arg-Pro-Pro-Gly-Phe-Ser-Ala |

## Methods

### ■ 166500 Peptidase, Tumor Necrosis Factor- $\alpha$ Converting Enzyme (TACE)

---

|                            |                                                            |                              |                                                                       |
|----------------------------|------------------------------------------------------------|------------------------------|-----------------------------------------------------------------------|
| <b>Source:</b>             | Human recombinant insect Sf21 cells                        | <b>Pre-Incub. Time/Temp:</b> | 15 minutes @ 25°C                                                     |
| <b>Substrate:</b>          | 10.0 $\mu$ M Mca-P-L-A-Q-A-V-Dpa-R-S-S-S-R-NH <sub>2</sub> | <b>Incubation Time/Temp:</b> | 30 minutes @ 25°C                                                     |
| <b>Vehicle:</b>            | 1.00% DMSO                                                 | <b>Incubation Buffer:</b>    | 25 mM Tris-HCl, pH 9.0, 2.5 $\mu$ M ZnCl <sub>2</sub> , 0.05% Brij 35 |
| <b>Significance Crit.:</b> | $\geq$ 50% of max stimulation or inhibition                | <b>Quantitation Method:</b>  | Spectrofluorimetric quantitation of Mca-P-L-A-Q-A                     |

## Literature References

**Cat # Reference**


---

- 112250 Barrett AJ (1980)**  
Fluorimetric assays for cathepsin B and cathepsin H with methylcoumarylamide substrates. *Biochem J.* 187: 909 - 912.
- Hulkower KI, Butler CC, Linebaugh BE, Klaus JK, Keppler D, Giranda VL and Sloane BF (2000)**  
Fluorescent microplate assay for cancer cell-associated cathepsin B. *Eur J Biochem.* 267(13): 4165 - 4170.
- 112350 Yasuda Y, Kageyama T, Akamine A, Shibata M, Kominami E, Uchiyama Y and Yamamoto K (1999)**  
Characterization of new fluorogenic substrates for the rapid and sensitive assay of cathepsin E and cathepsin D. *J Biochem.* 125(6): 1137-1143.
- 114110 Johnson LL, Dyer R and Hupe DJ (1998)**  
Matrix metalloproteinases. *Curr Opin Chem Biol.* 2: 466 - 471.
- Knight CG, Willenbrock F and Murphy G (1992)**  
A novel coumarin-labelled peptide for sensitive continuous assays of the matrix metalloproteinases. *FEBS Lett.* 296 (3): 263 - 266.
- 114210 Knight CG, Willenbrock F and Murphy G (1992)**  
A novel coumarin-labelled peptide for sensitive continuous assays of the matrix metalloproteinases. *FEBS Lett.* 296(3): 263 - 266.
- Olson MW, Gervasi DC, Mobashery S and Fridman R (1997)**  
Kinetic analysis of the binding of human matrix metalloproteinase-2 and -9 to tissue inhibitor of metalloproteinase (TIMP)-1 and TIMP-2. *Biol Chem.* 272 (47): 29975 - 29983.
- 114310 Johnson LL, Dyer R and Hupe DJ (1998)**  
Matrix metalloproteinases. *Curr Opin Chem Biol.* 2: 466 - 471.
- Knight CG, Willenbrock F and Murphy G (1992)**  
A novel coumarin-labelled peptide for sensitive continuous assays of the matrix metalloproteinases. *FEBS Lett.* 296(3): 263 - 266.
- 114710 Johnson LL, Dyer R and Hupe DJ (1998)**  
Matrix metalloproteinases. *Curr Opin Chem Biol.* 2: 466 - 471.
- Knight CG, Willenbrock F and Murphy G (1992)**  
A novel coumarin-labelled peptide for sensitive continuous assays of the matrix metalloproteinases. *FEBS Lett.* 296(3): 263 - 266.
- 114800 Johnson LL, Dyer R and Hupe DJ (1998)**  
Matrix metalloproteinases. *Curr Opin Chem Biol.* 2: 466 - 471.
- Knight CG, Willenbrock F and Murphy G (1992)**  
A novel coumarin-labelled peptide for sensitive continuous assays of the matrix metalloproteinases. *FEBS Lett.* 296(3): 263 - 266.
- 114910 Knight CG, Willenbrock F and Murphy G (1992)**  
A novel coumarin-labelled peptide for sensitive continuous assays of the matrix metalloproteinases. *FEBS Lett.* 296(3): 263 - 266.
- Olson MW, Gervasi DC, Mobashery S and Fridman R (1997)**  
Kinetic analysis of the binding of human matrix metalloproteinase-2 and -9 to tissue inhibitor of metalloproteinase (TIMP)-1 and TIMP-2. *J Biol Chem.* 272 (47): 29975 - 29983.
- 114950 Belaaouaj AA, Li A, Wun TC, Welgus HG and Shapiro SD (2000)**  
Matrix metalloproteinases cleave tissue factor pathway inhibitor. Effects on coagulation. *J Biol Chem.* 275(35): 27123-27128.

---

Howard Hughes Medical Institute

Study #: TW04-0003166, Compound Code: JP43 (1222269)

Thursday, November 08, 2018

Page 13 of 16

## Literature References

| Cat #  | Reference                                                                                                                                                                                                |
|--------|----------------------------------------------------------------------------------------------------------------------------------------------------------------------------------------------------------|
|        | <b>Pittayapruek P, Meephansan J, Prapapan O, Komine M and Ohtsuki M (2016)</b><br>Role of matrix metalloproteinases in photoaging and photocarcinogenesis. <i>Int J Mol Sci.</i> 17(6): 868-887.         |
| 115200 | <b>Belaouaj AA, Li A, Wun TC, Welgus HG and Shapiro SD (2000)</b><br>Matrix metalloproteinases cleave tissue factor pathway inhibitor. Effects on coagulation. <i>J Biol Chem.</i> 275(35): 27123-27128. |
|        | <b>Warner RL, Lewis CS, Beltran L, Younkin EM, Varani and Johnson KJ (2001)</b><br>The role of metalloelastase in immune complex-induced acute lung injury. <i>Am J Pathol.</i> 158(6): 2139-2144.       |
| 115300 | <b>Johnson LL, Dyer R and Hupe DJ (1998)</b><br>Matrix metalloproteinases. <i>Curr Opin Chem Biol.</i> 2: 466 - 471.                                                                                     |
|        | <b>Knight CG, Willenbrock F and Murphy G (1992)</b><br>A novel coumarin-labelled peptide for sensitive continuous assays of the matrix metalloproteinases. <i>FEBS Lett.</i> 296(3): 263 - 266.          |
| 115400 | <b>Johnson LL, Dyer R and Hupe DJ (1998)</b><br>Matrix metalloproteinases. <i>Curr Opin Chem Biol.</i> 2: 466-471.                                                                                       |
|        | <b>Knight CG, Willenbrock F and Murphy G (1992)</b><br>A novel coumarin-labelled peptide for sensitive continuous assays of the matrix metalloproteinases. <i>FEBS Lett.</i> 296(3): 263 - 266.          |
| 115450 | <b>Belaouaj AA, Li A, Wun TC, Welgus HG and Shapiro SD (2000)</b><br>Matrix metalloproteinases cleave tissue factor pathway inhibitor. Effects on coagulation. <i>J Biol Chem.</i> 275(35): 27123-27128. |
|        | <b>Pittayapruek P, Meephansan J, Prapapan O, Komine M and Ohtsuki M (2016)</b><br>Role of matrix metalloproteinases in photoaging and photocarcinogenesis. <i>Int J Mol Sci.</i> 17(6): 868-887.         |
| 115490 | <b>Belaouaj AA, Li A, Wun TC, Welgus HG and Shapiro SD (2000)</b><br>Matrix metalloproteinases cleave tissue factor pathway inhibitor. Effects on coagulation. <i>J Biol Chem.</i> 275(35): 27123-27128. |
|        | <b>Pittayapruek P, Meephansan J, Prapapan O, Komine M and Ohtsuki M (2016)</b><br>Role of matrix metalloproteinases in photoaging and photocarcinogenesis. <i>Int J Mol Sci.</i> 17(6): 868-887.         |
| 115510 | <b>Belaouaj AA, Li A, Wun TC, Welgus HG and Shapiro SD (2000)</b><br>Matrix metalloproteinases cleave tissue factor pathway inhibitor. Effects on coagulation. <i>J Biol Chem.</i> 275(35): 27123-27128. |
|        | <b>Pittayapruek P, Meephansan J, Prapapan O, Komine M and Ohtsuki M (2016)</b><br>Role of matrix metalloproteinases in photoaging and photocarcinogenesis. <i>Int J Mol Sci.</i> 17(6): 868-887.         |
| 115520 | <b>Belaouaj AA, Li A, Wun TC, Welgus HG and Shapiro SD (2000)</b><br>Matrix metalloproteinases cleave tissue factor pathway inhibitor. Effects on coagulation. <i>J Biol Chem.</i> 275(35): 27123-27128. |
|        | <b>Pittayapruek P, Meephansan J, Prapapan O, Komine M and Ohtsuki M (2016)</b><br>Role of matrix metalloproteinases in photoaging and photocarcinogenesis. <i>Int J Mol Sci.</i> 17(6): 868-887.         |
| 115560 | <b>Belaouaj AA, Li A, Wun TC, Welgus HG and Shapiro SD (2000)</b><br>Matrix metalloproteinases cleave tissue factor pathway inhibitor. Effects on coagulation. <i>J Biol Chem.</i> 275(35): 27123-27128. |

---

## Literature References

**Cat # Reference**

---

**Pittayapruek P, Meephanan J, Prapapan O, Komine M and Ohtsuki M (2016)**

Role of matrix metalloproteinases in photoaging and photocarcinogenesis. *Int J Mol Sci.* 17(6): 868-887.

**163950 Russell FD and Davenport AP (1999)**

Evidence for intracellular endothelin-converting enzyme-2 expression in cultured human vascular endothelial cells. *Circ Res.* 84(8): 891-896.

**Valdenaire O, Lepailleur-Enouf D, Egidy G, Thouard A, Barret A, Vranckx R, Tougard C and Michel JB (1999)**

A fourth isoform of endothelin-converting enzyme (ECE-1) is generated from an additional promoter molecular cloning and characterization. *Eur J Biochem.* 264(2): 341-349.

**164010 Erdos EG and Skidgel RA (1989)**

Neutral endopeptidase 24.11 (enkephalinase) and related regulators of peptide hormones. *FASEB J.* 3:145-151.

**Shipp MA, Vijayaraghavan J, Schmidt EV, Masteller EL, D'Adamio L, Hersh LB and Reinherz EL (1989)**

Common acute lymphoblastic leukemia antigen (CALLA) is active neutral endopeptidase 24.11 ("enkephalinase"): Direct evidence by cDNA transfection analysis. *Proc Natl Acad Sci USA.* 86:297-301.

**166500 Amour A, Slocombe PM, Webster A, Butler M, Knight CG, Smith BJ, Stephens PE, Shelley C, Hutton M, Knauper V, Docherty AJ and Murphy G (1998)**

TNF-alpha converting enzyme (TACE) is inhibited by TIMP-3. *FEBS Lett.* 435(1): 39 - 44.

**199007 Takasaki K, Iwase M, Nakajima T, Ueno K, Nomoto Y, Nakanishi S and Higo K. (2004)**

K579, a slow-binding inhibitor of dipeptidyl peptidase, is a long-acting hypoglycemic agent. *Eur. J. Pharmacol.*, 486(3): 335-342.

## Reference Compounds

| Cat #  | Assay Name                                                  | Reference Compound | Historical         |                |                | Concurrent |                    |
|--------|-------------------------------------------------------------|--------------------|--------------------|----------------|----------------|------------|--------------------|
|        |                                                             |                    | IC <sub>50</sub> * | K <sub>i</sub> | n <sub>H</sub> | Batch *    | IC <sub>50</sub> * |
| 112250 | Peptidase, CTSB (Cathepsin B)                               | E-64               | 4.20 nM            |                |                | 429901     | 5.23 nM            |
| 112350 | Peptidase, CTSD (Cathepsin D)                               | Pepstatin A        | 0.93 nM            |                |                | 430131     | 1.38 nM            |
| 199007 | Peptidase, Dipeptidyl Peptidase 4 (DPP4, DPP IV)            | K579               | 3.70 nM            |                |                | 429912     | 7.48 nM            |
| 163950 | Peptidase, Endothelin Converting Enzyme-1 (ECE-1)           | Phosphoramidon     | 4.90 nM            |                |                | 429910     | 12.4 nM            |
| 114110 | Peptidase, Matrix Metalloproteinase-1 (MMP-1)               | GM-6001            | 7.50 nM            |                |                | 430051     | 8.86 nM            |
| 114210 | Peptidase, Matrix Metalloproteinase-2 (MMP-2)               | GM-6001            | 1.20 nM            |                |                | 429904     | 1.60 nM            |
| 114310 | Peptidase, Matrix Metalloproteinase-3 (MMP-3)               | GM-6001            | 0.056 µM           |                |                | 430052     | 0.044 µM           |
| 114710 | Peptidase, Matrix Metalloproteinase-7 (MMP-7)               | GM-6001            | 0.066 µM           |                |                | 429905     | 0.066 µM           |
| 114800 | Peptidase, Matrix Metalloproteinase-8 (MMP-8)               | GM-6001            | 0.86 nM            |                |                | 430053     | 0.69 nM            |
| 114910 | Peptidase, Matrix Metalloproteinase-9 (MMP-9)               | GM-6001            | 0.72 nM            |                |                | 430054     | 0.64 nM            |
| 114950 | Peptidase, Matrix Metalloproteinase-10 (MMP-10)             | GM-6001            | 0.12 µM            |                |                | 430055     | 0.12 µM            |
| 115200 | Peptidase, Matrix Metalloproteinase-12 (MMP-12)             | GM-6001            | 0.80 nM            |                |                | 429906     | 1.05 nM            |
| 115300 | Peptidase, Matrix Metalloproteinase-13 (MMP-13)             | GM-6001            | 2.50 nM            |                |                | 430056     | 1.59 nM            |
| 115400 | Peptidase, Matrix Metalloproteinase-14 (MMP-14)             | GM-6001            | 8.30 nM            |                |                | 430057     | 6.58 nM            |
| 115450 | Peptidase, Matrix Metalloproteinase-15 (MMP-15)             | GM-6001            | 3.40 nM            |                |                | 430058     | 3.14 nM            |
| 115490 | Peptidase, Matrix Metalloproteinase-17 (MMP-17)             | GM-6001            | 13.0 nM            |                |                | 430061     | 0.023 µM           |
| 115510 | Peptidase, Matrix Metalloproteinase-19 (MMP-19)             | GM-6001            | 0.11 µM            |                |                | 430062     | 0.11 µM            |
| 115520 | Peptidase, Matrix Metalloproteinase-20 (MMP-20)             | GM-6001            | 8.80 nM            |                |                | 430059     | 3.41 nM            |
| 115560 | Peptidase, Matrix Metalloproteinase-24 (MMP-24)             | GM-6001            | 2.70 nM            |                |                | 430060     | 1.40 nM            |
| 164010 | Peptidase, Metalloproteinase, Neutral Endopeptidase         | Phosphoramidon     | 1.60 µM            |                |                | 429911     | 0.83 µM            |
| 166500 | Peptidase, Tumor Necrosis Factor-α Converting Enzyme (TACE) | GM-6001            | 0.021 µM           |                |                | 430142     | 0.042 µM           |

\* Batch: Represents compounds tested concurrently in the same assay(s).

Howard Hughes Medical Institute

Study #: TW04-0003166, Compound Code: JP43 (1222269)

Thursday, November 08, 2018

Page 16 of 16
